# Supplementary material for: Evaluation of INSTAND e.V.’s external quality assessment for C-reactive protein and procalcitonin
Source: PLoS One. 2019 Aug 16;14(8):e0221426. doi: 10.1371/journal.pone.0221426 (PMC6697325; doi:10.1371/journal.pone.0221426)
Supplement: S1 Table — This table contains the raw results of the EQA participants without any correction. Results from obvious swap of samples are highlighted in green. Results that were excluded because they exceede the calibration by > 20% in at least one sample are highlighted in orange. (XLSX) [file pone.0221426.s001.xlsx]

## Sheet: CRP_all_high
CRP-EQA - All results, positive samples
Additional Information
This table contains the raw results of the EQA participants without any correction. Results from obvious swap of samples are highlighted in green. Results that were excluded because they exceede the calibration by > 20% in at least one sample are highlighted in orange
January 2013	May 2013	August 2013	November 2013	January 2014	May 2014	August 2014	October 2014	January 2015	April 2015	August 2015	October 2015	January 2016	May 2016	September 2016	October 2016	January 2017	May 2017	September 2017	November 2017
34.9	56.1	29.4	17	43.79	92.75	127	114	22.7	86.4	120	120	120	104	52	1	86	77	58	63.7
37	69	25.41	14.91	51.2	80	117	115	21.1	85	125	107	104	77.3	45.7	21.2	94.5	119	74.4	61
41.3	61.9	27	16.2	51.3	92.1	116.6	122.1	24.9	101.4	130	101	100	81.4	50.8	23	78	152	58.2	76.04
38.6	67.7	26.5	14.8	49.8	108	120.2	140	18.9	96.7	141.8	120.7	111.8	88.6	55.3	19.8	77.5	140	68.1	65.9
37.5	64	26.9	17.2	55.1	89.9	119.6	117.6	23.8	76.3	131.7	105	109.9	95.2	54	17	86.2	133	63.2	67.9
41.9	61.3	25.8	15.43	4.76	76.8	106.86	118.6	23.7	89.7	134.7	74	120	84.1	52.5	17.7	85.9	129.6	62	74.7
0.36	66.2	27.4	15.8	55.6	96.6	128.8	133.6	27.4	88	113	111	11.7	85.79	58	1.6	88.4	128	62.2	66
39.9	61.1	25.6	16.5	56.1	9.71	129	123.8	24.3	107.4	144	108.7	100.9	87.5	61.9	19.4	88.5	126	61.5	70.1
40	68.1	29	1.467	54.7	113	138	130	26	91	139.3	113.9	123	86.8	54.7	18.1	59	125.2	62	61.4
41.6	56.2	28.2	17.3	50.6	114	140.1	0	21.7	77	132	108	114	97.1	56.1	20.7	84.3	120	65.9	61.79
46.9	69.3	33	19.8	51	95.1	127	135	20	90	129	105.6	119.8	89.4	60	19.9	87	116	69.3	73.4
37.6	62	27	16.6	560	63	125	114	230	82.1	131	101	99.3	87	68.5	18	89.5	115	65.7	80.5
35	67	27	15	54.2	108.2	132	1440	22.1	89.9	153.3	1	100	54.4	47.1	17.5	79.4	109	65.5	68
41	57.3	3.4	17	55	97.2	128.9	133.9	23.8	91.6	133	90	112.4	88	58	19.3	84	91.1	67	79
37.8	0.42	24.4	14.6	61	91	125	125	26.3	90	133.1	103.7	116	82.8	58	15.5	75.3	88	75	63.2
41.87	68.6	28.4	16.34	46.73	100	144	143	25.1	98	134.5	116	108.6	82.4	55.6	19.5	91.5	87	75.7	61.47
40.7	67	28	16.9	61	91.1	123.3	118.8	25	93.4	125	104	52.88	97.6	46.7	19.7	91.3	86.4	74.4	73
40	70	28	15	51	78.5	132	85.5	22.2	92.2	154	114	105.4	83	51.8	16.6	96.4	86	78.8	70.2
41.3	68.9	28.8	15.7	55.9	9.5	139.3	129	22.7	80.8	135.8	88	112	93.2	60.7	20	89	85	76	1.55
36.44	59.6	25.72	15.24	46.4	101.5	125	134.9	22	8.75	133	109.23	92	82.1	61.1	19.1	69.5	84.4	65.8	60.6
33.5	78.3	28.1	20	58	87.7	120	113.7	23.2	91.2	129	87.7	119	84.3	63.5	20.3	89.5	84.1	7.78	82
38.2	60	28.5	14	60	106	120	120	21.1	78.6	148	10.1	107.99	92	52.5	19.5	101	83	55	84
47.7	57.2	25	15.6	54	63	138	120	24	102	121	114.5	26	78	52	20.8	89	81.3	64.43	72
36	54.3	25.9	14.1	51.4	96	130.6	135	25	5	110	99.6	102	97.1	53	19.2	82.2	81.3	57.9	0
40.7	68	24.3	16	48.3	132.2	132	178.25	27	96	120	0	115.7	76.4	67.9	19.7	98	81	60.3	78.33
34.4	70	26	19	57.98	102	178	154	23.8	135	144	120	104.1	86	52.4	18.9	93	81	65.5	6.94
40	62	24	18	60	0	150	38	28.91	114	137	115	117	96	61	18.9	82	81	68.3	91
44	77.3	28	19.99	53.5	107.97	215	134.6	33	40.4	135.3	111	120	87	68	20.6	84.1	80.6	73	71
41.71	68	1.21	21	53.6	84	143.54	114	28.5	95.86	142	138	113	86.1	61	23.2	45	80.6	57	76
36.8	100	25.1	15	50.5	98	141	41	25	83	29.6	100	106	100	60	19.3	92.5	80.6	56.85	60.6
36.5	58	30.84	14.1	49	92	130	0	23	82	148.49	124.43	100	94.72	22	20.3	90	79.3	69.8	64.52
45.8	54.3	24	15	5.5	11.51	129	145	22	112	111	105	117.72	85	52.67	18.6	86	79.3	60.96	71.8
45	63	28.2	0.9	46.4	87.7	145	113.7	28	100	138	101	94	72	57	20	88	79	72.4	78.7
41.7	67.3	27.2	16	49	88.1	125	122.6	25	78.6	131	118	105	76.4	18	15	83	79	66.9	71
36	69	25	16.7	50.7	94.5	125	130.4	21.1	83.56	136	121	104.1	87.17	52.4	16.3	81	79	58	63
34.4	69	24.3	16.2	62	10.2	143	140	21.88	80.4	157	99.6	100.7	85	44.38	19.3	80.1	79	57.3	0.2
37	61.2	63.5	15.82	55.4	102	141	132	23.9	105	156	103	114.6	94.3	61.4	18	83	78.9	66	62
42	67	28.3	15.6	50	83	136	113	24.7	94	121	109.8	108.7	85.4	58.7	18.3	81	78.7	50	69.1
42	65	2.7	15.2	48.2	65.7	122	133.6	24	87.9	127.89	121.5	106.9	85.8	60	20	87.5	78.2	61.5	67.5
42	64.8	28.3	15.2	49.7	82.29	131	114.8	19.9	85.9	146.8	107	41	83.4	51.2	14.4	79.1	78	56.8	60
37.3	54.6	25.5	14.6	43.9	68.1	118.1	113	22.5	85.6	148.2	105.73	105.8	85.5	54	18	78	78	65.99	79.5
38	71	26.4	1.6	56	10.9	131.5	139	22.2	92.9	131	112.8	95.3	75.9	51.2	19.1	70.3	78	61	65.5
64.5	67	27	34	5.5	159	137.1	200	20.2	88.4	124.1	93.7	116	83	54	21	91	77.8	60.8	68.7
37.9	64.9	26.3	16.2	86	110.1	141	139.4	24	86.9	135.5	96.5	104.9	79	56	19.3	82.1	77.3	67.5	67.8
34.6	65	23.6	15.7	57.3	84	120	117	31	87	133.5	110.6	118.2	72	64.6	18.2	93	77.1	61.7	62.2
41.7	55.8	2.7	13.9	49.4	9.17	143.1	136.1	24.7	104.5	128	107	98.4	93.3	52.6	18.5	86.4	76.9	59.9	73.7
63	63.3	32	20.6	50.1	10.5	124	126	20.8	78.5	137	151	100.7	85.5	48	20.5	87.1	76.8	61.4	82.97
37.3	61.8	28.6	14	50.2	88	132.1	139.8	21.4	87.2	194	123.5	97.1	82.2	60	15.5	85.4	76.7	71	83.4
38	66	26.8	15.6	6.3	86	134.4	118	0	102	150.1	105	103	89.6	48.9	16	73.4	76.5	56.5	71
34.7	63.5	24.5	14.4	52	91.2	141.2	126.9	22	78	132.8	89.3	97	83	48.8	15.4	82.2	76.5	60.2	68.5
46.1	60.5	31.7	13.7	49.9	8.58	125	116	19.8	81.4	139.8	116.7	110	83.7	56.7	18	78	76.4	57.2	72
40.4	59	3.05	11.2	46.7	105	122.6	124.2	22.3	85.4	182	96	109	96	63	15	86.7	76.3	58	77.2
38	68.5	26	14.2	50.8	84.1	125	130	25.3	98.71	1290	102	100	84.5	71.6	18.3	85	76.2	91	69
37.5	84.6	27	16.69	55.8	93.5	128.1	110.3	30.7	134.3	137.5	101	109	84	54.9	18	110	76.1	54.7	66.3
28.9	51.3	26	22	45.4	78	121	124.2	24.9	90	135	123	0.1	86.2	52.3	16.7	86	76	60	79
36	60.2	28.3	11.5	49	118.43	128	121	16.1	88.9	148	133.4	111.05	88	59.53	20	78.4	76	61	72.1
41.1	66.62	35.5	16.29	40.7	82.8	133	138.17	22.4	88.4	198	116	102	88	101	17	77	76	57	66.3
42.3	77.5	25.8	27	53.9	79	200	118	16.7	92.7	144.2	112	59.6	89.05	52	15.3	85	76	66	65
53.6	60.2	29.17	15.8	54	94.6	125	124	26.24	86.9	140.1	0.4	98.1	145	56.4	17.2	88.2	76	63.8	71
34.6	64.9	32.4	14	53.7	108	120.4	120	43	93.59	128	117	103	83	120	19.6	97	76	59.4	67
37.7	77.31	29.15	14.3	52	98.5	120	115	21	87	143.12	114	103	83.6	51.3	21.2	78.8	75.9	62.4	66.8
39	147	29.3	15	48.1	103.7	131.4	131	17.9	86.2	133	110.32	112	119	59.7	16.8	99.1	75.8	68.5	66.2
40.6	64.9	27	15.05	58	99.4	121.2	141	20.9	90.2	133	98	99	86.1	53.6	17.5	103	75.5	70	86.9
43.7	68	25.6	14.4	48.1	86.1	103	130	24.3	91.2	128.5	99.7	107.8	86.2	55.6	14	80.6	75.5	60.14	66.9
36.9	60.5	0	17.3	54.6	76.8	133	121.5	18.7	82.9	130.9	85.6	104.7	68	47.2	16.1	81	75.4	73.6	0.55
41.15	79	23.7	17.2	56.7	104	122	111.2	16.6	93	128	108	97.1	86	60.3	20	96.4	75.2	58	65.3
36.9	0.24	256	10.7	39.1	85.9	107	130	21.4	92.7	141	116	124	82.8	51.6	22.4	89.3	75	63.2	74
35.7	59.2	28.3	13.8	45.3	83.3	110	128	24.2	87.2	125.4	108	101.1	88.8	60.4	19	104	75	59	88
44	75.4	33	17	54	77.3	103.4	113.7	23.2	80.1	122	80	118	82.4	61.88	14.1	84.7	74.8	74	74.3
33.6	0.8	26.3	19	50.9	91.6	120	118	20.8	85.8	125.5	90.5	126	90	54.3	16.9	83.4	74.6	59.2	4.99
41	53	27.4	16.1	49	165	179.5	117.6	21.1	78.3	166.5	96.6	120.12	84.5	55.4	15	55.5	74.6	69.7	67.8
40.1	66.7	25.6	1.44	48.8	84.5	141	180	19.2	75.5	127.1	97.5	107	122	61	17.3	93.4	74.6	63.4	65
34.8	70.8	26	12.8	50.8	106.8	126	122.7	22.8	120	120	103.5	121.8	86.7	49.8	18.7	104	74.5	62.4	71
37	114	30	14.5	56	102	143.2	114.8	26	76	180.6	156.8	100.8	95	47.9	20.6	84	74.3	62.5	67.4
42.1	64.3	32	17	73.3	80.1	125.3	124.8	30.8	99	148.6	102	92.35	92.8	55	18.2	82.6	74.2	74.3	65.5
43	64	28.2	21.3	54	94	12.8	113.5	26	97.1	132	125.4	104	85	10.6	19	85	74.1	67.2	58
37	57.8	25.6	18.1	52.4	85	126.1	129	24	89.3	152.4	127.9	98.3	82.3	49.4	19.6	79.2	74	59.6	63
35.5	64.2	32	15	57.6	124	1400	123.8	21.8	83	137	106	101.4	82.5	50	6	81.7	74	66.2	73
37.1	70	28.7	20	58.4	87	119	123.4	23.3	81	136.6	98.5	97	81	56	21.6	27	74	70.6	83.6
37.2	73.2	28.4	16.2	48.2	83	122	14	20.8	75	141.6	106	96	88.2	69	19	67.7	74	59.2	82.7
42	67	28	17	51	74.8	150	117	22.5	75.6	126.6	105.5	119	72.4	65.2	20.1	88.7	74	69.8	71.6
40.6	67.2	25.5	14.2	50.6	109	12	4.99	22.9	83	114.9	91.8	10.56	85	64.25	17.5	89	74	73.7	73.2
40.2	69	2.7	1.5	56	109.2	137	98	21.5	80.5	135	100	118	28	57.5	24.4	1.2	74	70	70.1
42	85.5	26	15	53	101	139	144	21	90.7	130	104	118.5	4.99	58.2	14.3	82.4	74	67.5	68.7
37	115	24	14	49	96.6	135.6	90	20.5	100	120	120	109	98	55.4	14	96	74	53.5	67.3
40	64.9	31	13	52.5	89.2	125	134	24	100.8	12	120	96.5	96.1	51.5	21.1	79.4	74	73	68
45	59	31	15	25	95.6	140.2	128.3	17.8	89	145	124	103.8	92.95	53.2	21.3	81.8	73.6	57.5	60.8
44.1	55	28	11.4	59	91.1	133	127	24	91	140.2	122.4	88.7	88	54	17	63.4	73.6	59.9	68
45	75	26.8	16.3	59.6	102.9	130.1	127	35.15	97	146.5	115.8	108	76.4	63	19.7	84	73.6	52.3	75.6
35.1	62.5	32.8	18.8	55	96	118	125	22.7	90.5	134.8	101.2	106	85.3	53.7	20.5	82.1	73.6	59.6	65
35	62.3	32.25	16.1	51.5	131.8	182	120	21.9	91.1	129.4	89.9	117	82.5	60.5	22	88	73.3		78.4
39.9	75	29	19.36	51	148	180.6	109	23.6	89	136.9	106.5	110	82.1	62.8	19.3	85.3	73.2	64.3	68.52
44	72.5	32.03	14.1	49.3	84.8	137.1	167	22.8	86	136	94.5	116.9	86	55	18	92	73	65	81.4
40	67.5	26.6	16.9	50.9	118	30.7	71.5	22.1	117.1	131.5	110	11.2	84.2	68.2	20.9	76.4	73	63.3	96
46	62.7	27.7	14	52.6	9.86	152	128	24	112	140	104.3	170	108	52.48	20	90.3	73	66.5	71.6
35.5	65.7	25	14.8	51	30.7	145	134.2	22	34.5	151.68	120.21	109	9.1	43.2	18.8	81	73	63.23	69.9
43.6	69.9	25.5	15.1	65.4	103	135	32.4	32.7	98	152	122	92	95.3	56	19.2	92.2	73	66	71.7
43.7	66	26.6	16.3	67.3	98.6	172	145	31	97	144	120	113	86.3	60.5	18.2	87.6	73	60.6	63
41.8	60.8	24.8	16.1	52	124	143	137.3	25.7	70.7	150	11.13	102.49	3.9	59	24	94	72.9	65.6	81
43.8	71.8	26	14	49.4	100	123	168	25	91	142	150	92.8	89.6	62.97	15.3	87.4	72.8	71.2	82
37.7	64.6	31	0.21	63.1	113	129	142	25	90	148	111	102	80	63	19	80.4	72.7	56.8	65.9
40.6	75.5	28.2	20.6	57	103	146	123	25.3	97.4	134	10	104.7	96.1	58.6	19.9	89.9	72.7	62.9	67
38	61	34	14.6	53.3	91.74	123.9	138	21	78.38	150	122.4	119	81.19	52	17.1	86	72.5	58	67
37.5	72.3	26.4	14.3	53.4	93.3	126.5	127.42	22	83.5	136.35	103.05	111	87.5	65.2	20	85.3	72.4	66.5	70.3
43.9	72.3	50.7	40.3	59.9	86.8	118	141.4	25	89.32	128.5	99.5	252.36	89.95	55	20.3	80.6	72.3	57.3	0.5
41.5	56.1	29	17	50	99.2	127	120.9	20.32	87	135	105.5	106	72	43.3	17	85.5	72.3	72.5	71.8
40.9	61.9	29.7	17.3	55.6	63	109.7	154	23.9	76.1	190	94	112.8	58	60.16	18.4	1.4	72.2	66.2	80
34	38.5	29.3	0.7	53.9	91.5	139	132	24.13	91	137.6	102	77	23.2	53.5	16.7	80.8	72.1	60.1	75.5
42.8	71	25	19.2	52	77.2	113.2	98.3	22	98.9	106.6	104.6	117.6	91.83	53	160	82.9	72	54.1	70.5
44.8	64.6	29	14	66.1	93.1	112.8	125.5	18.3	85.8	140.36	116	110	87	55.3	19.3	101	72	73.6	68.4
42	77	27	17.3	52.4	87	120	107.4	24.2	75	120	78.1	114.9	91.1	56.7	20.8	80.9	72	72.7	58.9
35	68.1	25.4	15.6	51.75	83.2	106	119.5	27	90.3	112.6	115.67	116.1	85	48.9	20	98.8	72	58.4	74.7
42.5	62	27.5	15.29	48	100	145	119	18.4	78	129	120	95.2	98.2	61.7	18.1	77.4	72	65.06	77
37	68.1	26.8	17.1	52.7	55.1	137	108.7	22.4	100.8	150	112	98.1	89	62.2	19.3	80	71.8	86.9	83.4
41.1	70	29.18	15.4	40.2	92	126	128	20.4	83	150	98	105	83.2	61	19.4	84.9	71.7	72.25	74
40	60.3	28	18	50	101.2	140	130.9	24.9	87.6	14.76	119.2	70.4	81.5	50.3	20.5	95.8	71.7	58.8	70.9
31.7	66.8	29.5	16.23	51.2	83	149	120	21	92	0.5	113	96	80.4	52	20.3	99.5	71.7	72.38	74.5
35	67.85	24.8	12.8	49.4	102.2	125.5	137.6	22.1	82.7	130.3	121	103.9	87.4	56.9	19.3	81.7	71.7	64	65.1
39.9	67.5	27.7	16.5	42	100	103.4	150	33	84.6	131	119.1	99	82.9	56	18.4	91.8	71.6	62.14	73.3
43	66.2	27.6	15.7	5.4	89.8	140.5	123	20.1	82.1	143.4	104.5	105	77	61.3	21.1	69.8	71.6	69.8	68.1
39	74	25	13.9	58.4	94.5	117.2	117.6	21.9	77	174	102	111	92.6	72.3	20.5	81.5	71.5	64.6	106
42.4	54	24.4	14	60	110.7	124.2	136.2	21	99.5	170	103.5	99.1	89.5	56	22	79.9	71.5	67	83.5
38.3	61.6	26.5	13	49.2	91	142	114.4	22.9	92.5	137.5	98	101	91	54.2	17.9	81.1	71.4	66.8	72
42	63.7	25	1.5	61	98.5	140	0.2	19.7	97.8	142	119	102.5	53.6	47.7	11.4	69.3	71.4	6.69	67.7
38	65	2.8	16.1	49.3	86.3	125.4	130	2.6	40.4	129	113.9	111	83	66.9	21.9	91.6	71.3	57.4	65.9
41.7	63.96	29.2	16	49.1	93.7	142	140	33	86.7	134.2	115	119	87.4	73.3	13.3	8.75	71.2	60.7	117.11
39.2	72.1	27	1.62	51.19	96	171	113.7	23.7	85.2	133	112.1	126.5	90.5	107	20.2	81.7	71.1	30	73.8
38	61	28.7	15.6	46.7	83.1	125	146	40	93.63	121	101.3	108	90	45	17.9	83.3	71	99.8	77
40.2	70.6	27.6	17	53.6	92	136	174	24.6	94.7	162	103	98	97.9	52.8	17.7	41	71	75	66.8
38	73.9	27	13.7	48.6	112	142	0	25.6	107	133	114	99.9	101.2	55.7	20.7	50.6	71	70.133	73
35	72	24.5	15.58	52.4	89.9	123.3	130.3	21.4	89	141	116	113.62	98	41.5	18	102	71	71.4	64
42	58.4	25.81	14.2	53.4	102	100	236	21.1	89.1	94.5	127	119.4	78	65	18.5	99.3	71	55	69.9
41	64.59	2.73	17	52.5	104	115.7	136	23.43	92	151.63	107	98.5	90	70	20.4	98.3	70.9	67.3	65.6
35	78.6	29.3	14.6	46	103	95.5	130.6	28	86.4	149.9	116	82.9	87	32.83	20.6	92.7	70.6	66	65.1
42.2	57	26.1	16.5	61	93.1	139	113	24	98.9	135	99.1	178	84	61.4	17	73.7	70.5	57.9	65.5
0.8	71.34	28.4	15.1	51	85.6	145	118.3	23.7	95.8	175	118	94	95.5	55	20.9	86.5	70.5	63.8	64.62
41	65.2	27.1	16.2	80	103.6	127	133	23	50.8	141	110	87.7	79.2	54.3	21.8	87	70.4	60	72
35.6	63.4	28.6	19.8	55	95.5	127	124	21.6	113	149	115.5	101.7	168	52.8	15	88	70.3	65.2	74.4
38.01	66.1	27.2	19.4	55.4	116	149	126	24.96	86	133.9	194	104	84	51.9	17.1	97	70.2	69.5	80
35.3	68.3	31	13.3	52.2	108	123.6	126	24.2	100	133	102.5	104	110.9	58.3	21.6	84	70.1	60.9	79.8
41.7	65	32.7	15.5	56.7	98	139	1.3	20.04	97.9	1350	145	115	76	53.4	25.2	86.4	70	59.6	70
39.5	87	28	16.3	51.7	104	139.2	119	20.4	90	116.2	121.8	101.1	83.9	512	12	82.3	70	67.36	79.3
40.8	66.8	29.8	14.1	53.6	86.9	120.5	138	19	87	136.3	115	105	81.7	52.5	18.9	85.6	70	69.6	67.44
36.6	66	2.79	23.6	53.4	104.2	125.7	137.56	22.1	88	136	106.9	102.1	89	62	14.8	89	70	57.7	72.4
36.2	47.4	25.8	15.5	64	109.8	150	132	25	74.5	119.7	104	100.8	92	68.5	15.3	93	69.9	58.2	7.04
44.2	61	27.6	15.8	60.8	100	10.72	126.7	6.6	78.2	136	105	96.5	88	47.55	21.6	71.8	69.9	68.8	66
47.8	6.4	2.97	16.7	53.3	92.1	123.3	120	23.1	102	132	112	100.1	87.8	68	20.9	78.6	69.7	65	59.5
43.9	68.3	22	11	59.8	83.1	123.8	119	22.1	86.2	139.9	118	105.1	87	55.3	18.9	97.2	69.7	74.2	78
40	67	25.9	14.85	51.6	115	124.7	144	21.9	91.2	127.7	99	104.1	82.7	49.8	20.3	96.5	69.5	60.8	62.4
42.4	63	27	16	55.3	9.6	12.84	134.2	23.5	85	124.3	108	103	80.8	52.6	20.9	71.9	69.4	68.4	92
36.3	62	27.8	16.3	59.28	99.9	1370	133.7	24	82	130	104	121	844	50.4	20.2	86.4	69.1	64.5	67.3
36.8	70	26.3	16.5	66.8	84.3	140	136.1	24	84.4	131.1	98	111.8	9.3	62.2	20.2	95.6	69.1	68.97	69
36.9	66.1	0.287	16.2	53.9	89.8	133.5	135	23	79.1	133.7	96.9	92	84.5	62.6	2.09	90.1	69	65.2	78.9
40.2	65.1	28.9	15.4	49.6	83.4	131.3	124	20.4	85.2	137.7	103.1	99	83.9	55.5	16.3	92	69		66
33	72.5	48	17.1	58	97.4	117.9	131.9	21.2	87.4	1.58	92.6	102.5	91.9	56.6	13.8	92.7	69	59.95	74.8
36.3	13.3	25.6	15.4	50.6	111	127.7	127	23	76.1	113.5	92.3	103	89.5	48.3	19.1	78.5	69	55	72.5
37.8	76.5	31	26	49.5	117	157	137	20.8	86.5	134	105	95.45	93	73	20.6	97.1	69	71.2	67.7
42	74.3	2.68	14.8	56.9	89.3	200	128.9	22.1	90.5	148	934	116	91.8	30.7	15.5	98.9	68.9	68	69.2
41.5	106	25.6	15	49.1	117	120.8	123	21.4	99.2	132.9	105	111.3	84	64	18.2	80.7	68.7	64.7	86
45.1	66.7	28	12.3	55.6	99.1	116.96	126.7	21	39	127	1310	103.6	85	49.5	16.4	82.2	68.7	60.6	76
62	79	25.1	17.83	54	93	1390	116.4	22.9	100	128	98.9	11.2	97	59	21	44.7	68.6	67.2	28
37	73.5	28.7	14.2	53	78.7	126	116.9	24.4	100	135	113	108	85.5	52.7	24	82.3	68.5	63.8	77.9
36	67.52	27	15.93	46.4	79.6	121.7	147	24.9	85.3	129	100	104	80	56.6	16	93	68.4	59.1	66.2
48.9	62.6	34	14.16	53	120	130.8	120	20	96	126.9	118	120	83.1	56	18	88	68.3	69	63.3
39	67.7	26.87	17	55.8	87	133	113	23.7	84.31	155	102	111	84	60	19	35.3	68.3	53.9	71
41.1	50.7	34	16	55.4	86.4	70.3	93.07	22.47	78	172	106	1094	85	55.3	21	81.6	68.2	66	76
35.7	69.1	29.4	16	50.8	19.16	131	140	23	80	139	115.9	101.7	94.2	60.1	18.6	83.2	68	67	73.8
40.2	64	26	14.5	51.1	100	114.93	120	24.71	90.7	141	109.5	105	85.2	54.1	19	90.9	68	60.6	72.9
41	72	28.4	16	61	97.6	141	120	21.1	88.6	121.4	99.1	120	85	22	23.8	80.4	68	67.2	70
41	60	26.9	15.7	52	87.2	125.7	125.6	24.3	89.65	150	100.3	110	100	58.1	18.1	0.82	68	68.1	71
37.2	72	26.7	15.2	50	94.2	131	124	21.95	98	125.5	116	102	61.9	61	18.6	90	68	71	74
41	67.4	1	14.6	13.79	95	128	127.2	22.6	138	202	109.6	117.8	114.6	59	21.1	81.9	68	65.2	200
41.5	67.9	25.8	15.1	53	69.9	128	87.9	25	79	118	107	99	74.3	60	17.3	84.6	68	59	66.7
35	64.3	35.5	2.2	52.5	99	131	132	36	90.6	131	112	91.3	85.4	55	16.3	81.4	68	62.5	70.9
39.9	64.4	26	17	50.6	94.36	128.24	118.66	24.7	73.9	120	101	104.9	82.3	51	20	90.9	68	60.4	83
36.8	68	27	15.6	54.9	101.45	130.4	151	19.5	106	120	115	111	86.4	61	20.5	92.5	67.9	64.7	65.8
34.7	68	32.1	17.4	51.4	89	144	127.8	29	110	151	105	113	85	38.8	18.5	95	67.8	0.2	65.8
42	73	28.6	16	53.8	89.7	180	146	22.8	85.2	102.8	103.7	117	83.9	48.85	17.9	98.9	67.8	0	66
36	64	27.1	0.7	48.4	84.1	134.3	138.3	17.5	98	133	132	108.7	85	62.4	18.5	77.4	67.8	64.4	80.38
45	74.5	29.1	19.8	61	84.6	120	116	22.9	82.4	130	115	160	102	57	18.4	77.4	67.7	69.7	70.4
36.2	66.8	26.9	15.7	51.57	40	136	120.1	24	94	150	103	117	95	53	21.3	80.2	67.6	59.4	79
46.6	63.9	31	16.6	566	94.7	126	124.6	17.9	120	150	120	100	77.5	56	18.6	91.5	67.6	74.4	67.2
35	86.5	26.38	14.1	52.5	87.02	178	118	23.3	75	144	127	95.18	88.3	68	20	90.9	67.5	67.21	45
38.6	67	28.5	15.9	53	93.2	106	120.5	26.5	100	127	104.7	104	76.9	53.4	17.4	100	67.3	70	68.65
40.3	56.2	26.1	15.5	53	100	84	143	16.2	887	129.1	106.9	118	56.9	40	15.9	97	67.3	58.9	76
41.9	55.09	25.5	16.2	5.86	150	120	187	23.1	87	147.5	111	126.17	98	54	21.2	91	67.2	80.3	71
42.2	62	25.8	19	55.9	89.9	127	67.9	24.7	91	13.47	138	102.9	101.6	51.12	19.7	88	67.2	61.4	75.2
40.6	67.2	29	16.26	49.9	99.9	138	130.8	20.1	84	125	115	129	85.8	66	21.9	96.4	67.1	67	73.7
39.4	70	27.45	16.4	51.8	118	108.2	111	25	93	120	119.5	89	83.6	60.2	19	89	67.1	69.2	66.1
46	59.1	28	14.92	63	95	123.3	144	27.6	95.8	133.2	103	108	89	58	16	84	67	6.91	57.5
43.72	75.2	28	14	55	79.7	130.5	120.5	22.6	88.5	96	89.2	109	94	62	22	82.1	67	54.9	66.9
44.6	64.8	30	15.2	55	10.1	115	117.8	22.3	80.4	144	118	100.9	82	54.5	19.4	91.3	67	60.2	71
37	64	23.9	15.9	47.9	5	141	143	21.2	98.2	120	123.5	105	95	50.6	19.3	9.54	67	58.5	65.1
34.5	65	27.95	15.7	55	79.8	181	108	20	102	133.92	112	76	100	53.8	19.3	78	66.9	68.07	73
38.2	80	26.1	15.7	52.9	90.4	128	113	23.7	87.1	120	113	98.6	84.79	60	20.4	96.5	66.8	72.7	66.1
41.9	66.5	31	15.7	48.1	71.1	118.4	85	24.1	90.2	135	110.9	114	89.6	56.1	17.7	86.6	66.7	71	71.9
38.7	64.7	31	18	6.07	84.3	143	89.7	27	117	131	96	56.9	82.9	59.2	18.2	97.7	66.7	70	61.1
1.5	63.8	26.6	13.3	75	103.5	116	136.1	27.5	92.2	143	126	95.5	86.3	52.7	22	91.8	66.3	67.5	77.1
41.3	70	24	15.5	54.1	108.5	132	129	22	145	105.6	120	0.6	90	57.2	14.4	89.3	66.3	71.8	71.1
44	73	33.9	14.5	50	103	120	139	26	110	14	106.02	101.8	96.05	46.1	21.1	83.9	66.3	69.3	79
32.3	65	28.2	17	55.4	108	150.04	139	30	90.69	130.47	98.8	103.5	90.9	65.2	14.5	96.8	66.2	72	67
40.9	74	22.1	15	43.1	0	96	122	23.86	4.5	140	102	95.4	96.7	58	20.1	85.8	66.2	65.4	82
36.7	69	25.6	14.8	49.9	86.5	120	129	20.7	89	125.3	114	110.1	90	60	22.8	14	66.2	67.8	74
42	59.6	27.8	16	49.5	10.84	144.3	100.3	25	82.3	138	115.71	103	90	87.6	20.7	93.8	66.1	66	67
42	65.5	27.4	12	55	9.8	94.71	136	22.3	89	140.2	155.5	126	94	52	18	91	66.1	48	78
45	54	29	13.9	50.8	96.6	114	149	21.9	95.14	148.3	124	98.9	81.57	57.7	19.8	91	66	66.6	59.4
37.8	62.7	18.7	17.7	55	96	121	12.84	21	86	137.3	105	114	110	51.7	15.8	98.1	66	60.4	79.1
120	70.8	24.3	12.1	55	110.6	143	131	21	102	120.8	111.4	102.1	90	56	15.6	91	66	74.6	66.8
35.8	72.1	26.4	14.2	52.1	85	113.3	129	22	76	129	109	106	90	43	20.5	87.7	66	77.5	76
39	62.6	28.9	16.4	48	92.8	130.3	161.2	25	85.3	124	102	98	87.35	47	18.7	73	66		81
41.9	69.1	27	17	61.2	101.99	330	96	22.8	85	132.6	112	108	78.1	51.3	21.4	109	66		68.5
33.4	70	27.7	17	51	114	102	136	24.2	87.5	126.2	94.1	100	79.7	64.3	25.5	89.5	66	0	69.6
39	67	44	15.3	5.41	82	124.9	0	25.6	86.12	127	112	108.6	85.9	58.9	20	82.5	66	61.9	67.38
41	69.7	30	15	54.8	104	138	126.33	24.2	118	134.6	115	117.7	72	59.2	19	79.2	66	59.8	62.6
44	64.05	28.1	14.1	56	103.7	99.2	134	21.9	90.2	125	118	102	86.4	17.9	21.6	102	66	60	93
40	67.9	26.7	15.2	46.6	95.3	120.9	152.5	21.4	89.5	141.5	104	120.8	85.5	53.6	19	0	65.9	65.5	66.4
42	61	27.11	14	55	108	127	117	21.8	97	145	105.1	120	85.6	57.9	18.9	78.8	65.7	73.1	82.02
42.9	68.3	28	17.3	58	108	121.3	135	28.7	95.2	135.1	104	103.3	78.1	60.35	21.8	75.9	65.6	65.9	65.8
38.1	66	26.9	16	56.7	92.2	133.8	140.8	22.9	86	141	106	933	86.2	39	23	76	65.6	76.8	66.4
40.2	68.8	0	18.3	49.6	77	136.5	133.7	23.6	81.1	132.9	103	103	79.4	75.05	21.6	89.6	65.4	66.7	73.8
39.6	63	26.7	27	53.3	162.5	128.5	135	20.3	85.3	131.5	103.7	95.68	97.9	50	23.8	118	65.3	7	70.9
38	77	26.2	20	45	91	124	133	23.3	89.1	137.1	103.7	111.5	84.9	59.4	21.1	105	65.3	73.3	67.51
46	60.2	28	18	48.5	99	123.1	120.2	19.5	89.3	120	65.8	99	89	69.2	2.14	86.4	65.2	61.6	60
36	51.28	2.92	14.59	66.8	90.1	144	106	20.3	92.2	132	103	104	83.4	54.1	17.3	7.5	65.1	55.9	77.928
36	67	28.9	17	49.4	104	128.9	155.5	21.6	91	141	107.5	117.9	85	53.7	19	81.8	65.1	55.9	66.9
41.3	77.6	27.6	15.6	56.8	94.7	153	114	24.2	57.9	116	124.1	103	87.9	61.5	16	85	65	63.9	82.5
39.05	61.4	29	40	57	95.3	127	138	29	72.7	110.6	116.3	116	79	60.3	20.7	77.9	65	67.9	69.6
38.1	69	32.1	15.9	5.58	82.2	122.1	115.6	24.85	81.4	130.8	109	107.1	90.7	48.62	17.7	77.9	65	62.2	70.9
43.1	73.9	26	16	53	88.5	137.8	127	21.5	104.2	136.8	112	116.5	93	56.5	20.1	79.3	65	66.81	73.4
35.4	88.3	28.7	15.9	60.8	250	128	118	24.2	89.2	133	98.1	99.83	83.8	61	21.3	94.2	65	54.3	77.9
40.6	62	25	15.4	530	99.2	130	125.3	25	99	151.2	110	88.4	87.9	61.364	21.3	83.3	64.9	53	76.2
42.45	98	28.3	14	62	98.2	126	118	24.4	86.9	120	110	114	96.6	52.1	20.1	81	64.9	64.8	84.4
0.9	63	24.3	1.58	50.5	97	144	13.2	20.2	86.3	127.1	107.5	108.88	98.6	58.9	18.3	97.9	64.9	64.7	64
47.5	66.5	26.2	17.6	56.4	79.8	120	128.8	28	90.3	134	107	107.7	78.7	51	17.7	74.7	64.8	63.5	67.42
40	72	28.7	150	52.6	83.9	135	121.5	17.7	120	126.6	117	113.3	86.8	58.4	14.6	82	64.8	57.9	76
41.1	69	25.9	16	52.4	102	135.7	127.7	24.5	90.4	133	97.2	103	83.1	62.1	21.3	85.1	64.7	63.6	73
42	64.5	5	18.4	55.7	97.4	118	120	21.4	92.6	135.8	109.3	100.6	86	40.91	20.7	78.2	64.7	68.5	75
40	61.2	27.9	13.9	50.5	111	137	116	23.5	91	121.2	114.3	102	83.97	66.8	20.9	76.4	64.7	69.8	78
41.6	66.7	24.5	16.6	250	100.2	110.6	136	19.1	86.6	195	96	118.31	85.7	58.78	19	86	64.7	60.9	66.1
44.4	58.1	28	14.5	55.6	83.7	118.7	125.2	20.5	88.8	132	122.6	110	76.2	58.6	19	91.1	64.7	59.9	65
36	73.3	25.1	16	45	98.7	138	152	24.41	97	129.32	120	140	82.9	47.3	21	93.7	64.4	60.9	56.9
40.9	60.2	28.8	14	54.8	107	124.5	127	19.6	84	148	98.7	98.13	103.5	52	17	85.8	64.3	52.1	77.6
35.3	61.9	28.7	14.3	50.1	97.34	131.4	119.3	24.2	98.6	131.1	113.7	104	87	56.5	22	79.1	64.3	62.73	74.3
43	69.4	26.8	16	50	87.1	120.4	67.1	26.8	71.2	136	82.5	82.6	84.68	62	18.3	88.3	64.3	57.1	77.9
38.3	62.2	26.8	14.2	59.3	105	100	120	30.6	81.4	133	102.5	107	91.8	2.8	22	83.4	64.2	60.9	78
36.4	5	28.1	0	52.9	105	143	121	21	88.15	147.8	108.7	95.2	84.5	51.3	20.1	88.1	64.1	59	71.5
40.8	65.2	32	16.76	59	91.6	134	113	24.28	84.4	134.2	143	105.7	81.8	39.6	20.9	78.7	64.1	60.9	7.69
37.5	59.3	28.6	14.1	54.6	76.7	127.4	136	24.9	88.3	130.11	106	108	84.1	65.1	15.4	82	64	65	79.5
25	67.2	28.1	16.5	50	94.2	139	120	23.9	101.1	133	107	138.4	83.5	52.5	22.5	77.9	64	66.9	83
39	61.2	28.2	14.8	53.2	108.1	125	122	23.5	117	124	117	102.2	88.5	51	0	89.9	64	60.4	69.8
35.15	68.4	29.1	1.3	46	67.9	124	134.5	20.2	98.24	149.7	105	109.7	90.7	64	15.8	82.6	64	58.2	80.4
40.7	68	28	17	54.36	88.8	135.3	110	25.5	82	137	114	96.6	86.42	17.9	17.5	79.7	64	62	66.5
35.7	68.16	29.1	15.8	46.1	98	137.6	135.8	24.5	86.7	142.7	114.2	107	86.82	5.8	16	93.9	64	59.2	71.2
40.2	70.9	28.9	15.9	54.4	89.3	121.3	108.7	23.6	102	144	106.3	111.1	85	61.5	20.1	78.9	64	60.35	69
40.8	66	23.7	15	61	89.6	135	118.1	22.02	83.6	145	105.13	12	90.897	74.3	0.5	78.8	63.9	57.9	46
41.1	70.7	33.7	15.8	54.3	98.2	129	136	21.4	87.9	123.5	99.9	135	82.2	53.5	21.9	78.9	63.8	59.2	67
36.9	67	24.3	24	55.6	100	141.36	127	24.21	80.5	0.2	119	120	89.8	54.7	20.4	78.9	63.7	71.9	75
39.6	64.6	27.9	16.1	49.2	108.86	135	124.6	20	88.2	139.61	123.32	110.5	79.8	55.3	17.7	82.3	63.7	61.73	67
36	65.3	24.9	15.8	60.6	82	143.1	100	25.28	91.9	128.8	110	103.9	79.8	58.9	20	96.1	63.7	56.41	78.5
43.4	53.7	26.7	16.9	44.3	86.4	105.3	144.15	21.5	93.4	120.8	115.7	104	88.8	611	17.6	73	63.6	70	80
39.9	70	28.9	15.3	50.7	117	134	128	23.5	89.8	125.8	110	105	94.5	49	17.6	77.3	63.5	58.9	65
41.3	68.5	28.18	19	54	101	148.78	124	23.2	90.3	121	116.9	109	90.5	54	15.5	99	63.4	62.7	66.71
17.4	66.2	27.6	16	54.39	102	142	137	25.4	85.8	135.7	118.1	113	103.9	52.5	20.6	81.9	63.4	65	79.8
40	70.3	0	15.2	50.5	87.4	128.6	118	26.33	84.1	110	115	99.8	87.1	55	19	79.2	63.4	67.2	77
19.4	71.3	32.4	14.9	58.2	96.6	117.27	114	25.7	97	138	133	90	83.21	54.4	18.2	85.7	63.3	57.98	77.2
34.4	63.6	32.59	23.3	67.3	93.2	122.93	118.1	48.8	100.59	135	100.67	98.3	790	57	16.4	91.2	63.3	71	79
36.2	70.4	28	14.7	58.03	101.5	130	128	23.91	86.5	100	101.34	119	849.4	59	15	88.2	63.2	87.5	83.6
46.1	69.9	34	16.3	49	94.3	140.1	128	31	94.5	168.5	109	93.4	95	54	18.7	82.1	63	67.5	71.1
43.7	66	29.2	8.8	53.38	80.85	107	136.7	25	93	126.1	95.4	103	78.3	63	16.9	77.6	63	60.1	73.4
34.9	68.6	26.4	14.9	53	93.4	157	127.6	24.3	91	122	105	120	89.9	58	17.3	99	63	81	76.379
1	67.01	27	0.5	49.5	107	131.6	0.04	21.3	93.1	145.3	116	119	92	62.2	20.6	124	62.8	72.9	75.5
38.7	65.8	28.25	16.6	58.26	128.503	137	108	24	10	128	104	0	77.8	53.69	21.2	85	62.7	60	77.8
34.76	66.7	26.65	15.9	53.9	95.5	148.1	125	34.6	75.7	120	117	131	95.5	56.1	14.6	82.9	62.7	71	70
37.8	66	28.5	16.3	51	107.8	129.4	140.74	22.3	104	108.7	99.7	116	91	60	18	91.5	62.7	56.6	64.28
38.5	72	27.5	18.5	56.35	94.2	108	123.4	24.6	78.05	1590	117	100	90	64.4	19.2	74	62.7	70	68
42.7	71.5	25.6	16.3	55.3	98.7	130	150.8	24.4	89.16	128.2	105	117.65	80.9	5.8	18.2	90	62.6	63.3	72
36	70.56	29.3	14	51.28	107.9	120	117.8	27	86	12	96.2	118.9	83	56.7	19.7	80.1	62.6	75	65.4
41	63.5	28.3	16	51	102	150	131.7	21.4	85	133	106	110	86.8	60.3	13.2	81	62.6	64.7	72.3
40.5	61.9	27.26	16.1	56	100	114.4	148.6	23	82	178	110.3	110	8.61	65.6	15.6	79.5	62.6	60.2	70
43.4	66.8	28.4	15.1	55.203	98.3	118	133	21.8	96	120	12	124	1.2	66.8	17.4	94	62.6	58.1	70
40.8	61.5	26.24	15.5	51	89.4	117	137.5	18.4	86.6	130.1	111	103.6	112	71	15.7	4.99	62.5	69.7	58.6
35.5	64.3	26.7	16.3	57.5	99	110	119.3	24.1	93	106.2	0	118.2	87.1	55.19	15.4	50	62.5	65	75.3
43.4	53	30	14.3	56.4	76.4	127.5	119	19.4	80.6	140	120	117.5	84.4	68.1	20.8	77.7	62.5	71	62.7
42.6	77	28.738	16	57.5	99	95.1	145	29.1	98.1	129.15	107.15	108	86.6	38	14.5	78.8	62.5	92.2	64.14
37.8	65.5	23.6	16.4	56.8	90	120	139.5	26	85.7	130.5	85.7	111	87.7	28.1	20.7	97.6	62.5	72	74
38.5	59	30.1	14.2	56.4	91.9	122	139	21.5	102	148.6	230	114	87.9	60.6	18.1	79	62.4	66.9	70
36	69.19	25.5	15.1	62.6	104	120	135	17.1	32.1	129.5	110	105.5	80.1	66.9	17.7	110	62.3	67	81.66
41.796	57.3	28.8	15.6	56.6	85.8	87.8	120.3	25	90	115	104	81	83	63.3	16.8	90	62.3	67	74.4
34.3	71.1	27.2	15.28	56	98.3	103	146	22.9	80.3	127.3	107.1	113	82.3	54.1	18.3	84	62.2	69	72
39.3	63.3	28.4	16.3	56.4	110	128.4	123.4	22.6	7.27	94	114.9	109	108	56.87	19.6	105	62.2	71	69.8
36.6	69	29.85	16	50	8.8	129.7	123	22.8	100	128	116	104	84.7	60.1	18.5	95	62.1	63.5	69.6
41.5	57.1	27.4	17.343	62	111	140.19	120	25.32	116	130	120	93.1	94.7	61	18.8	91	62	61	68.4
43.5	66.1	27	13.9	49.8	93.4	142	119.6	25.9	125	136	99	106	94	64	18.1	92	62	89	66.8
39	63.8	24.81	17	55	73.2	132	142	24.2	107	131.2	71	102	8.8	52.35	21	99	62	47	84
44	68.3	28.23	16.1	60.9	92.9	98	120.8	22.4	81.8	142.3	99.4	115.3	95	42.3	19.3	77	62	63	71.7
40.7	66.9	27	16	54.15	85	118	75	23.4	79.4	120	120	108	0.14	56.5	19.2	80.5	62	68	66.7
67	70.4	28.1	14.9	51.9	96.1	142	125	20.1	6.7	159	96	100.2	75.7	53	18.9	77.2	62	69	68
38.1	69.3	24.7	16.4	61	128.6	112	119	26	90.5	64	102.8	98.32	86	69	13.5	138	62	108	200
36.5	110	25.9	15	77.2	155	114	132	29	82.1	150	120	107	79	64.8	21.5	65	62	84	87
41.1	65	24	15	50.6	100.8	137	154	20.3	90.91	145	114	104	95.2	49.7	20.7	88	62	63.5	74.8
34.6	68.23	30.7	17.6	61	79.1	123	120	23.5	33.1	140	0.04	121	83.84	52.2	0.88	98	61.9	70	70.3
41.4	70	26	17.8	51.4	123	147	155.6	26	95	147.25	83.31	103	95.9	45	18	85	61.6	74	75
35	67.4	29.1	16.3	45.1	80.3	120	120	25	88.9	150	109	119	87.2	56	23.2	77	61.6	200	71.4
43.1	59.9	25.1	24	51.3	99	136	18	29	100	135	124.3	100	89.6	57.3	21.1	108	61.4	72	67.3
37.1	71.8	33	17.7	42.2	48.7	141.41	93.8	0	78.95	134	123.53	107	84.3	58	19.8	100	61.4	69	83.8
43.3	58	30.4	15.7	52	99.9	1533	128	25	79.4	163	127	100.5	88.1	58.6	17	93	61.4	78	76.2
37.8	66.9	2.2	16	74.59	99.57	121	118	21.8	72	129	114	98.3	70.5	41.3	24	98	61.3	71	67.6
39	65	27	17	79	100	126	122.8	23.05	78.7	140	120	100	97.5	69.5	17.5	47.2	61.3	64	84
34.5	72	18.9	14.6	54.2	91.7	131	137.4	21	99.5	152.6	107	119	80	50.3	23	95	61.1	63	73
43.5	78.6	26.5	15	42.9	87	133	134	24.62	103	149.7	113.2	83	87	62	18.9	85	61	67.6	80.1
37	64	22.2	15.9	52.7	88.3	147.4	122	25.5	60	107	125.2	106	81.8	66.3	22	88	61	72	63.6
38	69.2	34.05	16.5	51	101	147.5	105	29	0	139	120.7	103	91.3	99	20	107	61	67	66
35.9	57.3	30	17	49.3	82.9	137.2	109	20.4	93	135.7	114	129.05	84	77.7	11	96	61	64	101
40.4	61.1	29	12.8	55.9	98.4	141	130	22.9	79.1	93.5	98	106.7	80	61.5	19.8	107	60.9	94	75
37.4	69	25.4	16	54.7	92	129.9	118.3	27.5	97	127	118	109	95.1	53.3	16.3	95	60.9	66	0
51.52	67	28.8	15.6	54	114	91	139	22.9	96.7	115.3	106.68	80	74.35	68	16.8	88	60.9	64	68
45	87.8	26.6	12.5	52.6	93.2	117.8	120	22.95	97.4	142	95.1	114	79.4	27	16.9	113	60.3	80	72
42.5	76	26.6	14.8	53	96.7	125.6	130	24.34	105.1	142.5	120	101	87	50.5	27	98	60.1	73	67.4
41.8	64.6	25.8	10	49.4	0	133	0	25.3	93.6	117	120	102.4	85	50.6	112	100	60	86.5	65.51
36.7	74	29.2	16.4	54	85	141.6	120	23.1	122	129.52	91.5	119	81.9	63	22	101	60	65.9	77
36	74	31.8	19.48	49	106.6	125.8	138.2	24	89.9	139.1	94.9	111	89	34.3	24	97	59.9	28	63.6
40.9	67.1	28.9	13	51.6	106	119.3	5	17.3	95.5	116	118	104.1	87.4	55.34	20	93	59.9	73	69.4
42.4	55.2	27.8	15.7	58.6	109.22	125	138.75	21.2	99.7	110	111	101.4	84.1	62.57	19	141	59.7	57	65
41.5	66	25.3	11.9	62	11.29	135.5	140.5	19.4	100.2	152	100.3	76	89.3	49	17.9	76	59.5	68.5	67.8
35.4	70.9	30	14.5	51.6	113	134	130	16.2	95.8	151	119.8	130.6	86.6	54.2	17.2	94	59.4	56	123
44	67	27.3	15.8	53.84	91.7	135.4	135	14.9	100	0.84	109	110	87	57.9	18	98	59.3	70	77.4
35.9	60.8	30	15.8	54	95.9	134	129	23.5	99.2	135	102.1	108	80.14	53	21	112	59.2	65.7	71.4
38	71	17	16.8	115	110	147	123.2	22.8	86.3	114.3	118	118	74.9	59.6	21	76	59.2	79	68.9
32	65	27.8	15.9	57	96.4	133.3	138.6	22.5	77.6	127.8	119	120	97	115	18	110	59	68.2	67.8
39.4	66	27.4	16.5	56.31	105.8	129	142.4	17.6	92	140	104	117.5	95	56.5	22	87	59	79.2	81
41.9	77	26.1	14.5	5.42	109.9	130.6	134	26.3	92.6	130	132.31	91	84.59	49.98	21	109	59	6.56	76
38	66	27	25	62	81.7	138.9	130	23.7	82.4	120	109.8	115	89	62.1	20	100	58.5	66	66.9
37.9	66.7	27.7	14.6	50.9	103.5	120	110	21.4	81.5	120	117	116	84.7	67.4	22	101	58.5	62	82.7
37	58	28	18	63	96	131.7	122	22.23	93.5	139.7	120	102.8	81	55.7	19	121	58.5	76	65.67
36.8	63.3	24.1	13	52.7	88.14	132	85.9	20	94	127.1	121	116	88	45	21.9	87	58.5	114	111
36.9	65	28	15.4	53.8	85.9	116	108.1	22.5	85	135	100	119	90.5	64	21	88.2	58.4	62.1	68.7
41	71.3	29	16.06	59.5	77	152	108.1	25	81.8	138	107	104.8	89.5	63	5	110	58.4	63.5	68
40	75	29.99	14	58.1	73.9	120	121.5	5	81.5	125.9	87.9	110	84.6	54.4	17	83	58	56	64.9
42.44	70.15	24.3	15.8	62.1	72.1	119	122.3	23.8	84.65	149.5	128.9	116	176	54	21	100	57.7	64	81.5
46.4	74.3	32	13.4	57	80.3	115.8	136	25	93.41	119.2	113	96.3	97	59.2	24	80	57.7	71.8	72.8
37	64.5	27.2	16.1	3	89.4	120	117.6	26	99.8	120	107	108.6	48.2	53	22	5.5	57.4	59.9	71.7
43.2	69.6	28.8	13.9	49.8	85.3	124	166	20.89	84.3	185	179	0	87.3	46	23	92	57.2		7.32
55	82	27.8	16	47.5	99	192	122.2	24.4	105.14	70	120	103	74	87	19	107	57.2		67.83
33.6	56	27.4	15.5	38.9	83.9	118.8	121.03	22.4	80	166.5	200	88.9	86.3	76	22	87.1	57		69
39.4	65	29.3	17	37.6	89.1	141.6	115.3	21	91.5	115.6	122	111	84.9	53	17	86	57		58
43.8	59.5	28.8	17.63	57.8	93.23	125.4	120.6	23.3	86	147.4	110.9	0.5	105	47	7	91	56.9		77.9
42.307	70.55	25.2	16.2	46.6	88.4	124	154.17	20.7	99	149	5	85.4	92	49.2	19	0	56.5		64
42.8	71.7	29	15.4	49	76.6	120	150	25	83.19	102	103	102.5	78.9	64.6	24.8	75.4	56.3		72.8
40.5	78.7	26.9	15.6	43.6	126.76	159.1	134	17.8	80.5	144.4	115	98.6	87	57.5	7	88	56.3		0
39	65.21	26.8	17	54	110	96	5	23.9	94.6	147	114	105	110.5	60.5	35	89.5	56.3		62
35	61.1	32	16	53.6	99.8	51	127	22.5	84.5	0	103.2	107	113	53.7	120	87.4	56.1		80.6
43.7	53.4	24.7	17.6	454	108	83	117	26.6	74.9	120	125	11.48	80.8	42	20.9	89.2	56		76.8
35	62.5	29	0.686	55	95.72	120	159	24.5	100.7	132	119.5	200	93.9	60	15	86	55.4		70.2
31.3	60.7	28.1	15.8	5	93	120	123.6	22.3	90	124.7	102.1	103	84.77		21	87.5	55.3		68.1
36	63	30	14.75	54.4	104	128.7	124.9	29.9	93.7	146	120	116	907		20	89	54.9		68.3
40.5	68.8	28.3	15.3	56	91.5		128	24.3	86.7	126	120.7	106	107		23		54.2		76
36.9	66	28	10.7	52	88.5		133.9	20.2	152	165	117	120	116		19.3		54		72.4
37.3	65.6	30	10.7	6	92.9		127.3	28	112	1	136.8	119	92.5		33		53.2
42	67	27.7	14.5	52.3	90.7		136.5	31.9	94.8	117.2	123	120	70.1		19.7		51
38.2	69	26	14.4	45.2	91.4		1149	43	89.5	194	9200	20	96.5		20.1		50.2
36.6	64.7	27.6	17	49.1	105		133	25.1	95.6	111.3	200	87.3	97		24		44.6
42	80.27	23.6	14.5	47.3	96.9		113.7	22	90.3	146.2	120		99.6		18.3		36.7
36.5	70	27.5	16.5	57.5	90		200	32	91.6	125	105.6		83.63		20.1		36
39	69.6	27	15.4	150	103		111	23.2	106	179	127		990		23		34.3
49	40	24.5	19	48.9	94.3		30	14.1	102	127.1	133		80.2		24.9		30.7
43.2	72	26.6	15	52.8	200		129	25.1	86.6		100		80.84		24.5		23
42	66.35	28.3	14.7	60.1	114		120	24.1	45		104.73		95		18		20.1
40.3	70	29	11.6	50.9	95.4		0	24	109		129		83.7		19		7.3
37	77	27.82	14.3	108	30		169	21.91	133		170		90.3		15		7.25
40	65.3	27.8	16.42	59	95.5		117.1	25	162		110		91.9		16		7.16
36.5	60.2	25.8	14	46.8	119		148	23.8	102.6		107		87.3		20		7.1
46.3	68	3	17	55.9	102		125.4	22	85		124		82.9		23		7
36.4	118	29.1	18	58	91.3		113.2	20.5	54		100		155		20.6		6.82
40.1	77.6	30	15.74	60.1	141		120	24.2	103		118		96		38		6.74
35	66	27.8	15	58.2	116		135.2	21.6	92.8		93		94.6		21.2		6.12
37.95	65.7		18	59.9	103.4		200	23.4	5.4		90.6		92.3		16.5		5.05
	70.5		15.5	49.9	89.6		149	22	89		200		59.5		22		4.5
	71.6		14.8	58	108		69.2		96.9		140		76		17		3
	78.4		12	59.6	141.4		120		96.5		104		91.31				0.5
	76.3		16		48		146.4		0		111		89.88				0.04
	64		15		120		74.2		74.15		111.5		75.6				0
	138		14.7		70.9		125.6		99		108.1		96
	5		16		109.4		136		125.2		106.6		98
	79.7		16.35		100		137		110		200		88
			14		117		9.2		84.5		104		80.2
			14.8				129.5		91.27		111.96		80.7
			14				117		97		102.2		95.3
			13.9						84.2		115		83.1
			10						100.4		108		86.3
			14.8						83				73.87
									81.8				104
									86				120
													87
													74
													90
													84
													84.9
													88.41
													88
													82.25
													23.8
													88.4
													85.4

## Sheet: CRP_all_low
CRP-EQA - All results, negative samples
Additional Information
This table contains the raw results of the EQA participants without any correction. Results from obvious swap of samples are highlighted in green. Results that were excluded because they exceede the calibration by > 20% in at least one sample are highlighted in orange
January 2013	May 2013	August 2013	November 2013	January 2014	May 2014	August 2014	October 2014	January 2015	April 2015	August 2015	October 2015	January 2016	May 2016	September 2016	October 2016	January 2017	May 2017	September 2017	November 2017
0.83	0	1.9	1	0.25	0.83	1.27	0.08	0.26	0	4.99	4.99	4.99	4.99	0.31	18	1	4.99	0	0.13
1	0.5	1.24	0.4	0.54	0.9	1	0.2	0.01	0.15	0.46	0.38	0	1.46	0.55	1.5	1.5	8	0.7	0.25
4.6	1.5	1.45	0.4	0	0.7	2.1	1	0.8	1.3	0.35	0.4	0.1	1.6	0.9	0.71	1	8	0.4	0.91
0	3.2	1.5	1.2	0.3	3.2	1.13	3.2	0.23	0	1.5	2.6	1.5	2.46	0.33	1.2	1.2	10	0.6	3
1	0	0	3.5	1	0.55	1	0	0.3	0.19	0.31	3.27	0.29	0	0.44	1.3	1.5	0	3.02	0
1.3	0.6	1.3	0.45	0.03	0.8	1.59	0	0.2	0.1	0.6	0.39	0.9	1.46	0.7	0	3.17	0.4	3	0
0.01	0.7	2.29	0.3	0	1.49	1.2	1.23	0	0.2	0	0.2	0.03	1.48	0.6	20.5	3.11	10	3.03	0
0.47	0.4	1.2	0.68	0.1	0.072	4	0.31	0.1	0	0.3	0.5	0.2	1.6	0.4	3.17	0	8	0	0.2
0.87	0	0	0.046	4.8	0	1.1	0	0.1	0.2	0.8	0.2	0	1.6	0	3	3.6	2	3.5	0.2
0.5	4.8	1	0	0.3	2.3	4.4	128.7	0.2	0	0.4	0.4	0.1	1.8	0.2	1.8	4.99	4.99	3.03	0.16
4.8	0.41	7.5	4.5	0	0.8	1.3	0	0	1	0.3	0.3	3.9	1.6	0.3	4.99	1.4	0	1	0.7
0.8	0	1.4	0.4	10	1	1	0	10	0.3	0	0	3	2	0.5	0	3.11	8	3.03	0.3
1	1	1	1	1.5	1	1	10	0.3	0.5	1	130.6	3	1.1	1	3.5	0.5	8	0.5	0.2
1	0.4	0.1	1	0.3	1.8	1.2	0.7	0.6	0.2	0.6	0.4	30	1.6	1	4.99	1.3	1	1.2	0.2
0.9	69.35	1.2	0.4	0.4	0.7	0.7	0.1	0.3	0	0.6	0.1	0.4	1.6	0.4	1.5	1.83	4.99	1.7	0.3
0.97	0.9	2.3	0.48	0.28	1.2	1.5	0.3	0.2	0.2	0.6	0.5	0.2	2.1	0.4	3.38	0	4.99	1.57	0.25
1.6	0.4	1.5	1.1	0.3	0.68	1.15	0.17	0.3	0.2	0.5	0.6	0.14	2	0.4	1.3	0	0.436	0	0.1
1	0.7	1.6	0.4	0	0.7	1	0.1	0.29	0.23	0.7	0.6	0.5	1.6	0.5	2.34	0	1.5	1.47	0.2
1.2	0.22	1.48	0.65	0.5	0.1	1.4	0	0	0	0.5	0.3	0.2	2	0.6	1.7	2.6	4.99	0	0.74
1.02	0.3	1.15	0.55	0.4	1.1	1.2	0.3	0	0.02	0.44	0.37	0.1	1.54	0.6	1.8	0.9	0.1	0	0.2
0.73	0.4	1	0.5	4.99	0.8	4.99	0.2	0.5	0.2	1	0.2	0.3	1.59	0.5	2.2	4.5	0.6	1.99	4.99
0.7	0	1.4	0	4.99	0	4.99	4.99	0.2	0.3	0.6	0	0.2	1.1	0.44	1	2.8	4.99	0.25	4.99
1	0.51	1	0.5	0.1	4.99	0.64	4.99	4.99	4.99	0.7	0.6	0.2	2	0.2	0	0.9	0.39	3.55	0.05
1	0.1	1.6	0.4	0.2	0.39	1.1	0.07	4.99	120	4.99	0.4	0	1.9	0.8	0	1.6	0.35	0.2	0
1.2	0	1.3	0	0	4.2	0	0.5	0.04	0.01	4.99	0	0.2	3.2	0.5	2.35	1.4	4.99	0.4	0.03
0.8	4.99	4.9	4.99	0.5	3	3.04	0	0.3	2.31	0.14	4.99	0.1	4.99	4.99	2.13	1.5	4.99	1.5	0.02
4.99	0.17	4.9	4.99	1	1	4	0.2	3.11	0	0.5	0.09	4.99	4.99	4.99	1.25	1.02	4.99	0.7	0.2
4.99	3.85	0.75	3.35	0.7	0.59	1.3	0.07	1	0.1	0.5	0	4.99	1	0.21	1.96	1	1.5	0.8	0.1
0.49	3	0.12	2	0	1.4	0.99	0.2	0.4	0	2	1	0.03	1.8	1	4.3	1	3.02	0.45	4.99
0.8	1.2	0	0	0.5	2	1.6	1	0.1	0.4	0.6	1.1	0.2	1.3	0.5	1	0.8	0.6	0.43	0.2
0	0	3.78	0.4	0	1	1.45	124	0.4	0	0.236	0.2	0.1	1.44	0.234	1.5	0.52	0.6	0.4	0.75
1.63	0.1	4	1	0.01	0.06	1	0.1	0	0	0.5	0.7	0.05	1	0.8	1.3	0.7	0.7	0.36	1.1
3	0.4	1.8	17.1	0.4	0.8	1	0.2	4.99	0	0.7	1	0.2	2	1	1.5	1	4.99	0.5	0.3
1.4	0.8	1.6	2	1	0.37	1.2	0.19	0.1	0.3	0.5	4.99	0	3.2	0.5	1.2	1	4.99	0.2	0.9
1	2	1	0.6	1.8	1.6	1	0.8	0.2	0	1	0.2	0.1	1.61	0.97	1.05	1.15	1	0.85	0.2
0.8	0.9	1.3	1.1	2	0.2	1.1	2	0.13	0.5	4.99	0.4	0.5	2	0.3	1	1.2	4.99	0.5	67.9
0.8	3.2	2	0.4	1.4	1.9	2	0.8	1.2	2	0.2	0.5	2	1.9	2	1	1	0.8	1	0.3
4.99	0.4	2.2	0	0	0	1.5	0	2	0.6	0.7	0.8	0.2	1.8	0.5	1.4	1	1.55	4	0.2
2	0.4	0.2	0.5	0.3	0.8	0	0.2	0.8	0.11	0.37	2	0.3	1.6	0.5	0.57	1.55	0.235	0.4	0.17
1.2	0.33	2.2	0.5	0.4	0.73	1.1	0.05	0.27	0.3	0.8	0.4	4.99	1.7	0.4	1.2	0.9	0.48	0.3	4.99
3.5	0.3	3.5	0.3	0.2	0.7	1.3	0.2	0.3	0.12	2	0.27	0.3	1.7	0.4	1.05	0.9	4.99	0.26	0.3
1	1	1.28	0.1	0.1	0.1	1.1	0	0.2	0.3	0.9	0.5	0.3	1.5	0.4	1.3	0.9	4.99	0.4	0.3
0.9	5	1.3	8	0	8	0.7	8	0.1	0	0.35	0.45	0.1	0.87	5	1.9	4.99	0.65	0.4	0.3
1	0.2	1.12	0.7	8	1	1	0.3	0	0.2	0.6	0.5	0.1	1.5	0.7	1.4	1.2	0.1	0.7	3.7
0.7	0.4	1.1	0.2	0.4	0.7	5	0	5	4.99	0.2	0.1	0.3	5	0.6	1.2	4.99	0.1	0.5	0.2
0.8	0.3	0.2	0.6	0.1	0.7	1.5	0.2	0.4	0.2	0.5	0.4	0.1	1.9	0.4	1.2	0.9	0.9	0.4	0.6
8	5.4	4.9	15	0.2	0.11	0.95	4.8	0.25	0.1	0.4	8	0	1.7	4.8	1.3	1.1	0.5	0.4	0.05
0.8	0.9	1.7	1	5.1	1	1	0.6	0.2	0.2	11	0.5	13.2	1.6	0.4	1	1	0.4	4.99	0.2
0.95	0	1.4	0.5	0.05	0.6	8.8	0	0	5.4	0.7	0.4	0	6.1	0.4	1.1	0.8	0.6	0.4	4.99
0.8	0.4	1.2	0.3	0	0.74	1.5	0.2	1	0	0.4	0.4	0.2	1	0.5	1.5	1.1	0.46	0.6	0.1
4.3	0.4	11.9	0.3	0.4	0.1	1	0.1	0	0	0.4	8.1	0.08	1.5	0.2	1.1	1	0.2	0.5	4.99
0.7	0	0.1	1	0.3	1.8	1.3	1	0.21	0.2	4.9	0	4.99	1.27	0.416	0.9	1.4	0	0.4	0.1
1	0.5	2	0.4	0.3	1.1	1.2	0.5	0.07	0.03	10	0.4	0.2	1.76	0.6	1	1	0.16	0	0.1
1	0.4	1.3	0.53	1.2	0.7	1.1	1	0.203	0.2	0.4	0.4	4.99	4.99	0.3	4.99	1.9	4.99	0.5	0.3
0.7	1	1	4.99	1	1	1.7	0.2	0.51	0.7	0.5	0.17	105	1.5	0.53	1	0	0.8	0	4.99
1	0.4	1.8	2	0.3	0.89	1.1	1	1	1	0.2	0.268	0.21	4.99	0	1.6	0.9	0.5	0.6	0.3
1.3	0.45	1.6	0.29	1	0.6	1.32	0.22	0.2	0.2	0.405	0.2	0.4	1.5	0.4	4.99	1	0.2	0	0.1
1.2	50	1.1	0.8	0.23	1	8	0.1	4.99	1	0.95	4.99	0.2	1.65	0.3	1.2	0	0.6	0	4.99
1.04	2	1.47	0.4	0	0.7	1	0.2	0.24	0	0.5	107.3	0.1	4.99	4.99	0.6	0.72	4.99	0.4	4.99
1	0.4	4.9	0.25	0.3	0	1.1	5	6	0.2	0.3	4.99	0.5	1.5	0.4	1.2	1.4	0	0.4	0
1.2	0	1.41	0.3	0.4	0.7	4.99	0.3	0.1	0.2	0.45	0.4	5	1.5	0.8	3	0.89	0.1	0.5	0.2
1.6	0	1.2	0	0.2	0.5	1.1	0.3	0.1	0.2	4	0.58	4.99	5	0.4	1.2	1.43	0.2	0.25	0.2
0.6	0.3	1.35	0.2	0	1.8	0.8	0.9	0.3	0.2	0.6	0.5	0	1.6	0.6	1.2	10	0.5	0.5	0
4.99	0.6	1.1	0.2	0.2	1.2	1.4	0.4	1.1	0.2	0.4	0.4	0.2	1.8	0.3	10	1.4	0.61	0.35	0.2
1	0.3	0	0.2	0.1	2	1	1.2	1.2	1	0.5	0.4	0.1	1.4	0	1.2	1	0.51	0.75	71
0.87	0	1.1	1.1	1.1	2	1.2	1	1	4.99	0.6	0.2	0.1	4.99	0.4	1	0.5	0.38	4	0.1
1.1	54.8	8	1	1.2	0.8	1.2	1	0.22	0.4	1	4.99	0	1.7	0.79	1	1.5	0.6	1	1
0.7	0.3	2.2	2	2	0.8	0.8	0	1	0.3	0.5	1	0.3	1.6	0.27	0	3.2	0	0	0.1
0	0.2	5	1	1.2	0.9	1.2	0.1	0.3	0.1	0.4	0.5	4.99	1.6	0.4	1.1	1.1	0.68	0.7	0.1
0.8	68	1.4	0	0.2	0.8	4.99	0	0.2	0.1	0.5	0.2	3.8	0	0.4	1	1.2	0.6	0.08	77
0.4	1	1.4	0.4	0.2	3.4	4	0.3	0.1	0	0	0.3	0.02	1.6	4.99	0.9	1	0.6	0.2	0.2
1.1	2	1.2	0.04	0.5	0.8	1	3.5	0	0.2	0.6	0	4.99	3.6	0.5	1.1	1.3	0.6	0.4	0
1	1	1.4	0.5	0.3	0.4	1	0.4	0.2	4	4.99	0.5	0.5	1.7	0.5	2.3	1.2	0.9	0.28	0
1	5	4.9	0.4	4.99	0.4	1.2	0.1	4.99	0	4.5	2.1	0.3	1	0	0.68	2	1.44	0.5	0.1
1.1	0.4	2.1	4.99	2.7	0.65	1	0	2.9	0.1	0.2	0.4	0.1	0.7	59.7	1.1	1.1	0.2	0.7	0.13
5	0.499	2.4	0.9	1	1	0.1	0.1	0.3	0	0.4	0.7	0	4.99	0.4	1.13	1.3	0.57	0.7	0
1	0.5	1.4	0.05	0.4	0.8	1.1	0	0.4	0.3	0.2	0.2	0.2	1.7	0	1.31	0	0.4	2	0
0.9	0.4	4	0.2	0	0.8	10	0.1	0.2	0.1	0.6	0.5	0.25	1.5	1	23	0.9	1	0.8	4.99
0.7	4.99	0.5	2	0	1	1	0.18	0.3	0	0.2	0.35	0	20	4.99	1.4	1.2	4.99	0.5	0.5
1	3.2	0.5	0	0.3	1	1	0.1	0.2	1	0.5	0	0	1.5	0.8	1	1.43	0.2	4.99	0.3
4.99	0.8	0	0	0	0.9	4.99	0	0	0.24	0.5	0.4	4.99	1.57	0.7	1.4	4.99	4.99	1.8	0
0	0.3	1.2	0.4	0.5	1.1	0.9	150	0.3	0	0.49	0.37	0.049	1	0	1.22	0.6	0	0.6	0.2
1.1	0	0.1	0	5	6.2	1.5	0.5	0.21	0	0	0	0.4	1	0.4	3.3	85	1	0	0.1
1.7	0.2	1.3	0.2	0.3	0	0	0.4	0	0.5	1	0	0.15	87	0.4	1	0.5	0.5	1.2	0.1
1	5	7	0.3	0	0.7	1.1	3.3	0	0.2	4.99	4.99	0	1.1	0.4	0.12	1.4	4.99	0.75	0.2
0	0.4	1.2	0	0	0.7	1	0	4.99	0.2	0.05	0.5	0.3	2.2	0.4	1.3	0.6	1	0.75	0.2
0.5	0	6	1	0.5	0.7	1.1	0.2	0.5	0	0.6	0.7	0.2	2	0.5	0.9	3	0.5	0.5	0.1
0.6	0.3	1	0.6	0.5	0.8	1	0.2	0.4	0.2	0.5	0.7	0.1	0	0	1	4	0.8	3	0.3
5	1	1.4	0.8	1.6	1.6	1.4	0.1	5.2	0.2	0	0	0.1	1.5	0.19	1.5	2	0.6	4.25	0.05
1	0.5	1.3	0	0	0.9	1.3	0.2	0	0.2	0.4	0.4	0.3	1.6	0.6	0.8	1.1	0.5		1
1	0.499	3	0	0.3	3	5.6	0.8	0.2	0.3	0.4	0.4	4.99	1.6	0.5	4.99	1	0.9		0.6
1.2	0.8	0	12.86	0.3	4.99	5.6	0.2	0.2	0.7	0.45	0.3	0.1	1.5	1	2	1.1	0.7	1.2	0.1
10	4.9	10.31	0.3	0.2	0.8	1	4.99	0.2	0.3	0.5	0.4	0.03	1.7	0.7	1.05	1.55	0.6	1	4.99
9	0	1.3	0.8	0.3	4.99	3.1	0.1	0.3	4.99	0.7	0.5	0.04	1.5	0.38	1.8	1.01	1.46	0.15	4
3	0.2	2.4	0	0.9	0.07	0	4.99	0.5	4.99	0.6	0.4	5.9	4.99	0.74	2.1	1.3	4.99	0.9	1.4
0.7	3.19	1	0.4	0.3	1.9	0.98	0.2	0.3	0.5	0.29	0.18	0.2	18	4	0	1	0.1	0.38	0.1
2.5	1.1	1.2	0.4	0.15	1	1.4	0.2	4.99	1	4.99	4.99	1	1.3	0.9	1.2	0.6	1	1.4	0.9
0	1	1.8	0.5	4.99	0.8	6	0	4.99	0.2	0	0	0.5	1.7	0.1	1.9	1.31	4.99	0.34	0
0	0.4	2.85	1.25	4.99	2.9	4.99	0.25	1.7	3.7	0.19	0.06	0.1	52.7	0.44	1	1.2	0.65	0.72	0.4
2.6	0.5	1.3	0.4	0.2	1	1.2	4.4	2	4.99	0.6	6.65	0.39	1.9	4.99	0.67	1.1	0.5	0.5	0
0.8	0.7	4.6	0.03	1.1	0	4	4.99	0.07	0.2	0.5	0.55	10	2	0.6	4.99	1	2.7	0.5	0.3
1.3	1.7	6	0	1	1.23	1.65	0.4	0.3	0.09	0.5	0.1	0.9	2	0	1.5	7.96	0.6	0.4	0.3
1	0.4	4.9	0.3	0.06	0.84	1	0.32	3.3	0.1	0.75	0.7	0	1.46	0.6	1.55	0.9	0.99	0.4	0.01
0.8	0.3	1.3	0.5	0.3	0.94	1.4	0.1	4.99	0.25	0.42	0.37	0	2.16	0	1.5	0.3	1.1	1.5	0
0.1	4.99	8.1	21.6	2.1	0.6	8	0.4	0.4	0.41	0.71	0.62	0.21	1.69	0.4	1.8	1	0.567	0.2	73.7
1	0.4	2	0	0.3	1.66	1.5	0.3	0.13	6	4	0.54	4.9	6	0.23	1	1.4	0.5	0.6	0.2
1.56	0.4	1.1	0.15	0	5	0.9	0	0.41	0.5	0.49	6	1.1	0.9	0.5	3	79.4	1.8	1.3	1
0.9	1.6	2.5	16.2	0.36	1.77	1.6	0.53	0.46	0.5	0.7	0.6	0	0.2	0.3	4	0.9	1	0.5	0.19
3.1	0.09	1.4	1.4	0.2	0.9	0.5	0.5	8	0	0	0.02	0.4	1.73	0.74	2	1.1	0	1	0.2
4.99	0.3	0	0.5	0.41	1.8	0.9	0.2	0.499	0	0.43	0	0	4.99	0.4	2	1.4	0.02	0.7	0.1
4.99	0	1.74	0	0.3	0.9	0	0	0.5	0.5	0.49	0	0.5	1.8	0.57	1.8	1.02	4.99	0.8	3.11
0.8	0.4	1.3	0.7	0.78	0.5	0.8	0	0	0.3	0.55	0.43	0.04	1	0.5	1	1.2	4.99	0.4	0.2
1.2	0.6	1.53	0.29	6	0	1.1	0	0	0	0	0.5	0.3	2	1.1	1	1.6	4.99	0.48	0
0.48	0	1.3	0.69	1.24	1	1.3	0.5	0	4.99	0.7	0.2	0.3	0	0.5	1.4	0.8	1	0.41	0.5
1	0.32	1.27	0.5	0.5	0.6	1	0.34	0.499	4.99	0	1	0.45	1.5	0.4	1.84	1.29	0.13	0.7	0
0	0.69	4	8	1.5	1.8	2	0.6	0.3	0.2	0.02	0.7	0.3	1.6	0.45	0.97	1.05	0.1	0.4	3
4.99	0.4	2.15	1.23	0.1	1	4.99	0	0	0.3	125.9	0	11.6	1.4	3.17	2	1.32	0.5	0.51	0.2
0.8	3	1.4	0.5	0	0.9	1.2	0.3	0.3	0.3	0.3	1	0.3	1.74	1	1.23	1	1	0.8	0
0.47	0.52	2.3	0.8	0	4.99	1.2	4.99	7	0.28	0.47	0.5	0	1.5	0.3	0.8	1.23	1.4	0.49	0.4
1.04	1	2.1	0.7	0.02	0.7	1.95	0.2	0.2	0.23	0.5	0.3	1	6.5	0.5	0.8	1.2	0.6	0.2	0.2
0.9	3	0	0.1	1.7	0.7	1.1	0.2	0.3	4.9	5.7	0.61	0.28	1.6	0	1.67	1.17	1.25	0.5	8
1.18	0	0.1	0.36	0	1.94	0.9	1.03	1	0.2	0.436	0.4	0.4	4	3.4	1.2	1	0.31	1	0.2
0.8	0	1.29	0	6	0.8	1.7	0.3	0.25	0.3	0.3	4.5	0.2	1.76	0.5	1.1	1.25	1.3	0.4	4.99
1.37	0.41	0	0.027	4.99	1.8	1.6	119.9	0.4	0	1.4	0.36	3.17	1.6	0.8	0.4	1.1	0	0.05	2
4	0	0.5	1.2	0.3	0.6	1.1	0.07	6.9	0.156	0.42	0.4	1	1.4	2.15	4.46	1.1	0.4	1	0
1.3	0.3	1.8	0	0.2	0.99	10.1	1	0.22	0.2	0.4	0.6	0	3.38	8	1	0.12	1	0.32	0.29
1.2	0.75	1	0.08	1.55	0.8	1.56	0	0.1	0.14	0.35	0.406	0.49	1.8	0.3	1.22	1	0.3	4.99	0.9
0	0	1.8	0.7	0.3	0.7	0.7	4.5	0	3.28	3.28	0.3	0.24	2	0.3	1.2	1	4.99	0.53	0.3
1.2	0.7	1.6	0	1.4	5	1	0.2	0.1	0	3	0.35	0	1.3	2	1.4	4.99	0.5	0.1	0.3
0.99	0.5	0	0.2	1	0.73	1.3	0.1	0.29	3	3	3.28	1	1.5	0.43	0.8	0.6	4.99	0.648	1
0	0	1.1	0.25	0.73	0.43	1	0.6	0.2	0	0.45	1	0.2	0	0.3	1.2	1.6	0.4	0.7	0
4.9	0.3	1.24	0.4	0.3	0.5	1.2	1	0.28	3	1	0	0.49	3	0.7	1	1.27	4.99	0.42	4.99
1.3	0.35	0.13	1.2	0.5	2.4	1.25	0.2	3.28	0.15	0.21	3.2	1.14	1.6	0.4	1.6	1.1	0.5	1	0.4
1	0.5	1.95	2.9	4.4	1.013	3.45	0.2	4	1	0.6	0.4	0	1.6	0.8	1.5	1.4	1.2	0.5	0
1	0.3	2.9	0.8	0.27	0.7	1.4	0.22	0	0	1.32	1	8	1.6	0.5	1.05	1	1.2	0.6	0.2
42.6	0.32	1.9	0.83	0	6.6	4.99	3.45	0	1	8	0.5	0.2	2	4.99	1.6	1.4	1	0.1	0.17
0	2.9	1.7	0.7	0	3.17	0	0	0.25	0	0.5	1.57	0.2	1.7	4.99	1.2	4.99	0.47	0.6	4.99
0.8	0.4	1.59	5.6	3	1.1	0	5	1	4.99	4.99	0.3	2	8	0	0.2	1.3	1	0.65	1.3
1.05	0.67	1.56	0.56	0.24	4.99	1.2	0	0.2	0	6.7	4.99	0.13	1.4	3.38	1.6	1	1	0.9	4.99
0.9	0.8	8.2	0	0.3	0	1.2	0.2	0.499	4.99	2	0.3	0.9	1.9	0.4	1.26	0.8	0.2	0.4	0.5
1.41	5.1	1.5	0	0.2	3	1.4	1.4	1	0.9	4.5	4.99	0.2	4.99	2.5	1.26	0.7	4.99	0.3	0
2.9	0.47	0.6	0.48	0.3	0.6	1.3	1	0	4.99	0.42	1.5	0.9	2	0	0	1.1	0.5	0.28	0.4
1.5	0	1.46	0.5	3.17	1	3.07	0.5	4.99	2	0.6	4.99	0.8	1.46	0	1.29	1.2	6	0.7	1.29
1.08	1	0.11	0.57	0	1	1.1	0.31	0.5	0.24	0.3	2	4.9	2	0.6	0	1.55	0	0.4	0
1.1	0.4	1.29	0.39	4.99	1.05	4.99	1.33	4.99	0.06	0.47	0.38	4.9	2	4.15	1.1	1.4	1.1	0.4	0.08
3.8	0.35	3.45	3.17	0	1.85	0.34	0.1	20.6	0.5	1	0.49	0	1.5	4.99	1.3	1	0.53	0.22	0.13
0.97	0.03	0.16	0	0.3	0.2	2	4.99	2	0.2	1	0.4	4.99	1.6	0.65	1.5	1	0.18	1	0.5
0.6	3.34	4.9	4.99	0.15	1	1.14	0	0.21	1	4.99	0.5	0.2	2	1.2	1.42	0.76	0.1	0.7	0.2
10	0.2	1.17	0.34	1	4.99	1.12	4.99	0.1	0.3	4.9	0.4	0.3	4.99	0.45	1	2	1.15	0.4	0.2
1.01	4.99	0	0	0.5	0.22	0.15	1	0.6	0	0	0.5	0.7	4.99	0.5	0.9	1.1	1	0.5	4.99
0.9	0.32	1.4	0.48	0.31	0.39	17	0.06	0.3	4.99	0	1	5	0	0.7	1.35	1.1	2.9	0.2	3
1.03	0	1.5	1	1.1	2	0	2	0.5	4.99	0.5	0.3	0.49	0.17	0.4	1.2	0.66	0.1	0.49	0
3.34	0.39	0.019	0.65	0	0.73	1.1	0.2	0.6	0	0.6	4.99	2.68	4.99	0.5	0.11	1.16	4.99		1.36
1.1	0.4	2.29	1.5	0.2	0.54	1.6	0	4.99	4.99	0.6	4.99	4.9	1.4	3	1.2	1	1		0.2
4.99	0.6	8	1.27	4.99	1.5	4.99	0.6	4.99	0	0	0	0.65	1.6	4	0	1.4	8	0.49	0.5
0.75	0	1.5	0	0.2	1.2	4.9	0.3	0	0.3	1.8	4.99	0.13	1.6	1.2	1.3	0.8	4.99	0	4.99
1	1.46	4.9	8	2	0	4.99	0	0	0.5	0.83	0.42	0.5	4.99	0.4	0.9	1.3	0.7	0.4	2
1	0	0.1	0	0.3	0.8	8	0.3	3.45	0.5	4.9	5	0.3	1.2	0.5	1.25	0.1	0.6	4.99	1
1.4	8	0.2	4.99	0.39	0	0	0.5	0.1	0.5	0.35	0	0.7	0	1.1	1.4	0.8	0.5	1	4.99
1.47	0.4	0.135	1.2	0.9	2	1.06	4	0.3	2	0.1	50	0.3	1.33	4.99	1.28	1.12	0.9	0.6	1
8	4.99	1.24	0.14	0.4	1.7	13	4.99	0.5	2.63	0.5	0.5	4	4.99	2	1.5	1.4	3.02	0.6	0.2
1	0.4	2.3	2	0	4.99	3.45	4.99	0.5	0.2	0.7	0	1.2	1.72	0.1	1.5	1	0.57	1.22	0.5
4.99	0.1	1.6	0.52	0.2	4.99	1.2	3	0.499	0	0.43	1.26	0.2	10	4.99	0.98	0	1.3	0.4	0.13
0.7	2	0	0	0	8	1.2	0	1.11	0	1	4.99	0.49	1.7	1	1.2	1.2	1	0.1	0.1
2	0.43	1.2	0.8	1.7	0	1.3	0	0.4	0.5	0.7	0.49	1.8	1.48	0.4	4.99	1	1.15	0.5	4.99
0.94	0.23	0	0.6	1	0	0.8	0.57	0.24	0.1	4	0.1	0.49	1.4	4.99	1.3	1.1	0.5	0.1	0.3
0.9	0.8	2.2	0	4.99	0.78	2	0.2	0	10	0	0.5	2	2	0.6	1.2	1	4.99	1	0.4
1.2	0.6	1.3	0.45	4.9	1	0.49	3.45	0.5	0.9	0.8	0.2	1	2	0.5	1.2	1.37	4.99	0.4	1.41
1.1	0	2.2	0	4	4.99	1.5	0.1	0.4	0.13	0.5	0	4.99	1.6	0	1.11	1.1	4.99	0.3	4.99
0	0.3	4.9	1.1	0	0.8	0.77	0.9	0.8	0.65	4.99	0.7	1	4.99	0.67	0.8	40.7	4.99	1	8
0.77	0	4.99	1.3	0	1.7	1	0.3	0.35	0.2	3	0.6	0.2	1.6	4.99	1.1	4.99	4.99	1	0
0	0.8	0	4.99	0.41	1.3	1.15	1	0.6	3	3	0.55	4.99	5.5	4.99	0.6	1.1	1.1	1	16
1.4	0.6	0	0	0.3	0.5	1	0.5	0.35	0	4	0	0.5	4	0	0.7	1.3	4.99	0.41	0.16
1.2	4.99	6.7	0.3	3.17	2	2	3	4	0.2	2.5	0.4	0.3	2.6	0.4	1	0.9	4.99	0	1
1.3	0.3	3.19	0	0.24	1.53	1.15	0.82	0.7	0	4.99	0.4	0.6	1.5	4.99	0.87	1.4	4.99	0.6	4.99
4.99	4.99	1.4	0	1.7	1.05	1.25	0.3	0.1	4.99	0.5	4.99	0.3	1	0.6	1.4	1	0.56	0	0.1
1.1	0	1.28	0.5	1.1	0.82	1.5	0.3	4.99	4.99	0.3	4.99	4.99	0.9	0.45	1.2	1	0.2	67.8	0.14
4.9	0	1.3	3.45	3	0.2	6.4	0	3	3	0.49	3	4.99	2	0.4	1.2	1	0.7	0	4.99
0	0	1.2	15.2	0.5	0.6	1.3	0.1	4.25	3	2	4	0.5	1.6	0.2	0.73	0.79	0	4.4	1.37
1	4.99	1.9	0.586	3	1	1	0.1	1.5	4	1.1	1.6	0	4.99	0.47	1.12	0	1.4	0.5	0
0	3.19	3	0.7	1.38	0	4.99	0.1	4.99	0	4.99	4.99	0.2	1	4.99	1.4	0	0.27	0.5	0.5
4.99	0.3	3	0.5	5	1.6	3	0.3	0.499	4.99	1	0.55	4.99	1.5	1.49	0.9	0	1	0	0
3.4	0.451	2.24	0.4	0.28	0.63	3	3	0	0.5	4.99	0.2	0.28	4.99	0.4	1.2	0.6	1.25	0.44	4.99
1.1	0.4	1.6	1	0	0.8	4.25	0.2	0.1	0	0.3	20.5	0.4	2	0.5	0.1	1.4	0.7	0.5	0.24
1	0.4	1.4	2	0.5	1.2	2.7	0.3	0.499	0.5	0.6	2	4.99	1.4	4.99	0.54	15.2	0.2	0.4	4.99
1	0.17	0.6	0.5	0.4	3	4.99	4	2	2	0.7	0.4	1.18	4.99	0.33	1.2	4.99	0	1.1	0.95
1.4	0.9	0.8	3	1.35	0	0.9	0	0.6	0.9	0.05	4.99	0.3	1.9	4.99	0.6	4.99	0.3	0.4	0.2
1.6	3	2.2	2.09	0.25	1.7	1	0.4	4.99	5	0.52	1	0	1.5	0.4	1.4	0.7	0.43	1.3	1
2	2	1.3	0.7	0.7	4.99	0.5	0.1	1	1	4.99	4.99	4.99	2.07	0.3	3	4.99	0.43	2	0.2
3	1.27	1.6	0.41	0.4	3	2	4.99	4.99	4.99	0.7	0.3	0.2	4.99	1	8	1.2	0.4	0.12	0.2
2.14	4.99	1.6	0.2	1	4.25	1.4	3	0	0.5	0	0.4	0.2	4.99	0.5	0.8	0	0	0	0.4
1.1	0.45	3	0.5	1.5	0.21	4.99	4	0.3	0.2	0.3	4.99	1	8	0.4	0	1.4	0.4	0.3	3.7
0.84	0	0	1.3	0.3	4.99	1	1.4	0.3	0.2	4.99	0.5	0.2	1.4	0.4	1.3	0.11	9	1	0.2
0.4	0.3	2.4	0.5	4.99	0.5	4.99	4.99	4.99	0.2	0.63	0.1	0.1	4.99	0.5	0.67	1	0.1	0.283	2
1	4.99	1.3	0.55	3	0.9	0.9	0.5	0.7	0.2	4.99	4.99	0.4	1.43	0.6	1.6	4.99	0.45	4.99	0
1.5	0.7	4.9	0.65	4.2	0.5	1.1	0.1	0.5	0.66	0.5	0.4	0.49	2	0.3	0.6	1.6	0.4	0.6	1.3
0.86	0.75	4.9	2	0.11	2	1.4	0.5	4.99	4.99	0.29	0	9.68	1.2	0.4	1.16	0.77	0.39	0.48	0.1
38.4	0.8	3	0	4.99	1.9	1.7	2	1.1	0.5	4.99	0.3	0.2	1.45	0.5	1.3	1.3	4.99	1	0.3
1.2	0.7	4.9	1.4	0.5	4.99	1.7	0.7	0.499	0	1.81	4.99	107.9	4.99	0.6	1	1.12	0.1	0	0.5
1	1	1.8	0.4	3.3	1	4.99	4.99	0	0	0.06	0.39	0.09	3.13	0.7	1.3	1	0.4	1.9	4.99
0	0.3	1	4.99	0.1	0.5	2	1	4.99	0.19	0.48	0.4	0.7	1	0.6	1	1.8	0.4	4.99	0.2
1.2	4.99	1.3	1	0.5	0	1	4.99	0.23	0.05	4.99	0.34	0.1	1.1	4.99	0.9	1.3	0.3	0.2	4.99
1	1	0.2	3	0.2	0.8	4.99	0.6	0.3	0.2	0.5	4.99	0.3	0.5	0.5	1.4	8	0.8	1.7	1.52
4.99	3	2.4	0.41	2	0.4	1	0.1	4.99	2	0.66	1.45	0	1.5	52	0	0.7	0.42	1	0.16
1	0.44	4.9	4.99	1.2	0.18	1.05	4	1.06	4.99	0.6	0.2	4.99	4.99	0.31	2	4.99	0.2	0.3	4.99
4.99	4.99	1	0.5	4.99	1.6	3	4.99	0	1.14	1	0.3	0.2	0.87	0.59	1.32	4.99	3.76	1.1	1
3	0.499	1.03	0.2	1	4.99	1.16	0.08	0.499	0	0.5	0.5	4.99	4.99	1	1.09	1.3	0.6	0.4	0.5
4.99	0	1.2	0.5	0.5	1.8	1.7	0.5	4.99	0	0.4	0.4	0.53	1.8	0	1.18	4.99	4.99	0.7	0.2
0.9	0.499	1.6	2	0	1	2.3	4.99	0.3	0.5	0.4	4.99	0.24	1.7	1	1.6	1.3	1	0.9	0.5
0	2	2.2	1.2	0.3	0.4	1.4	0.5	4.99	0	4.99	0.43	1	0.1	0.7	1.2	1	0.5	10	0.5
0.5	0.8	4.9	4.99	0.5	0.73	1.3	0	0.2	5	0.5	4.99	4.99	1.1	0.6	1.4	1.2	4.99		0.1
0.5	0	2.5	1	4.99	0	1.14	0.1	0.81	0.1	0.67	0.3	1	1.5	0	5.3	0.7	4.99	0	0.3
2	1	0	0.5	0.12	0.81	0.9	4.99	0.2	0.02	0.5	0	0.5	1.5	0.5	4.99	1.1	4.99	0.4	0.08
1.3	0.7	2	0	1	4.99	1.87	0.19	1	4.99	0.6	0.6	0.2	0.5	0.3	4.99	0.7	4.99	0.42	0.15
4.99	0.3	0.8	0.3	4.99	1	1.3	0.3	0.3	0.2	0.4	1	0.35	5.51	0.4	0.8	1.5	4.99	3	0.2
1	0.6	1.1	0.6	1.6	0.2	1	3	0.3	0.71	0.4	0.4	0.3	1.8	0.6	4.99	0	0.9	0.95	0.08
0.6	28	1.16	4.99	0	0.6	1.3	0.02	0.4	0.2	0.6	0.4	0.49	1.9	0.46	1.2	1.02	0.82	0.5	0.34
0.7	1	1.3	0.5	4.99	4.99	1.3	4.99	6.13	1	0.8	0.4	0.2	1.5	0.5	0	0.58	0.3	1.2	0
0.9	4.99	1.9	4.99	0.1	0.7	1.38	0.4	0.3	0.3	4.99	9.12	4	1.4	0.49	4.99	0.9	0.33	1	0.25
1.2	0.6	28.9	1	0.26	4.99	1	0.1	0.7	0.1	1	0.5	0.68	1.3	0	1.2	1.2	0.5	0.5	0.3
0.4	0.3	1.29	0	0.39	0.9	1.5	0	0.3	0.15	0.5	0.23	0.2	2	0.5	4.99	0.7	0.51	0.01	0.7
4.99	4.99	1.1	0	4.99	0.6	0.7	4.99	0.8	6.37	0.3	0.4	0.2	1.1	0.77	1.2	1.7	0.47	0.6	0.3
0.7	0	4.9	4.99	0.4	4.99	1.2	0	0	0.0001	4.99	0	0	4.99	1	0.14	1.1	1.25	0.4	4.99
0	0.33	0.11	0.27	0	0.7	1.5	4.99	0.1	0.47	0.67	0.2	0.16	1.4	0.5	0.9	0.1	0.2	0.5	0.068
4.99	4.99	1.6	4.99	0	1.83	1.2	0.2	0.3	0.2	0.67	0.25	0.38	4.99	0.5	1.1	1.4	0.5	0.5	0.2
0.9	0.44	1.3	0.7	0	0.9	0	0.6	0.3	0.9	4.99	0.6	0.3	1.7	1.1	4.99	1.3	0.4	0.4	0.3
0.9	0.4	4.9	3	4.99	0.6	1.68	4.99	4.99	0.1	1	0.2	0.2	1.46	0.619	1.7	0.9	4.99	0.7	0.2
1.2	0.499	7.7	0.28	0	0.7	1.2	0.2	0.61	0	0.6	4.99	0.8	1.6	0.87	1	0.9	1	0.3	0.1
0.5	0.5	1.2	4.99	4.99	1	2.1	0.97	0.2	0.2	0.6	0.2	1	0	4.99	1.3	0.9	0.15	0.23	0.7
1	0	2.34	0.7	0.3	50	4.99	0.1	1.1	0.3	0.5	0.4	0.27	1.7	0.214	0.786	1.4	0.31	0.44	0.07
0	4.99	1.2	0.1	4.8	1.81	1.61	0.3	4.99	4.99	0.7	0.1	0.57	1.8	0.5	2.1	1.05	0.4	0	0.24
2.18	3	1.8	4.99	4.99	0.7	1.22	0.2	0.68	0.58	0.49	4.99	4.99	2	0	1.26	1	0.5	0.4	0.1
46.1	4.99	1.2	0	0.3	1.8	0	1	0.51	0.1	0.3	0.29	0.021	2.1	0.5	1.2	0.73	0.4	0.4	0.2
0.6	1.3	1.2	0.5	1.01	0.6	4.99	0.61	4.99	0.5	1	0.49	0.2	1.1	0.8	1.2	0.3	0.5	0.4	0.17
4.99	0.3	1.5	3.3	0.2	0.8	1.5	0.3	1	4.99	0.54	4.99	0	1.5	1.3	1.13	1	1.1	0.4	0.3
0.9	4.99	1.3	4.99	0.3	1	1.5	0.7	0.3	0.75	0.5	0.3	0.3	1.4	0.22	1.7	1.1	4.99	0.4	1
4.99	4.4	4.9	2.5	0.2	1.1	1.2	0	0.15	0.35	0.4	0.5	0.3	1.9	0.3	1.6	0.9	1	0.96	4.99
1	0.3	2.6	0.4	0	4.99	0.9	0.3	0.3	4.99	0.3	0.5	0.8	1.66	0.61	0.7	1.1	0.5	1.2	0.3
1.9	1.2	0.9	0.92	11	1.62	0	0.4	0.499	1	0.47	0.4	0.05	1.6	0.7	4.99	1	1	0.4	0.19
4.1	0.4	2.4	0.4	1.3	0.8	1.2	0.4	0.2	0.4	0	0.5	0.36	1.6	0.4	4.99	1.4	0.5	4.99	4.99
0.7	0.45	1.3	0.7	0.25	1.6	1.3	0	0.35	0.2	0.5	0.5	0	1.4	4.99	1.7	1.18	3	4.99	0.1
1.29	0.4	2.1	0.3	1.1	4.99	1.18	0.77	0.4	0.2	0.59	0.4	0.24	1.75	0.52	1	1.5	1	0.3	0.3
0.8	0.3	2.3	0.4	0.2	1.71	1.4	0.1	1	0.2	1	0.3	0	1	4.99	4.99	1	0.4	0.71	0
1.1	0.4	1.57	0.6	0.2	0.78	0.8	1	0.1	0.5	0.83	0.34	0.5	1.59	72.2	1.44	4.99	0.6	0.4	0.2
1	1	1.4	0	0.4	0.6	1.36	4.99	0.2	0.1	0.6	0.3	0.49	1.85	0.5	1.3	4.99	0.42	0.5	4.99
0.8	5	2.4	8	1	4.99	1.57	0.95	0	0	0.5	0.5	0.1	1.6	0.1	1.2	0.77	0.3	0.4	0.2
1.1	0.71	4.9	1.07	0	1	1	0.15	0.31	0	1.2	0.39	0.19	1.4	0.65	1.5	1	0.3	0.48	0.05
1	0.3	2.4	0.3	1.29	0.9	1.16	0	0.7	0.23	0.44	0	4.99	1.6	0	1	1	0.4	0.5	0
4.9	0.9	2.27	0.8	0.3	0.8	1.45	4.99	0.33	0	0.25	0.2	1	1.8	0	1.5	1.14	0.5	0.3	1
0	0.4	0	0.3	1.7	1.1	1.49	1	0.7	0.2	4.99	0.59	0.2	1.6	4.99	0	1	0.2	0.45	1.8
0.84	0.4	0	15	4.99	0.5	1.1	0.3	0.3	0.17	0.237	0.39	0.3	1.2	0.2	1.25	1.2	0.4	0.4	2
1.7	2	0	4.99	1.55	0.6	1.3	0.1	0.3	0	0.4	0.45	0	1.46	0.05	1.05	0.9	4.99	1	1
1	0.78	0	1.3	0.26	1	2.1	0.3	0.6	0.1	0	0.5	4.99	1.48	0	3	0.7	4.99	0.38	1.7
1.1	0.55	1.5	0.51	0	0.8	1.06	0.5	1	0.35	0	0.4	0	4.99	0.43	1.8	0.48	4.99	0.52	0.1
1.04	0.6	1.5	0.3	0	1	1.75	0.1	0.27	1	0.5	0.31	0.05	1.364	0.4	18.9	1	0.1	2	3.5
1.13	1.3	2.1	0.9	1	0.5	4.99	0.2	3	1	0.6	0.84	0.107	1.5	0.6	2	0	0.4	0.38	0
1	4.99	1.4	4.99	0.4	1.01	4.99	0.16	0.3	0.06	157.7	4.99	4.99	0	1	0.1	0.91	0.5	0.1	4.99
1.1	1	1.6	1.1	0.2	1.01	1.1	1	4.99	0.77	0.45	0.181	0.2	1.6	0.4	1	0.99	0.6	0.4	0.1
4.99	0.68	1.3	0.95	0.5	1	0	0.2	4.99	0.3	0.2	0.4	0.5	1.6	0	1.3	0.7	0.47	0.37	0
0.7	0	1.3	0	0.5	0.73	0.8	0.17	0.2	0.2	0.4	0	1	2.3	0.4	1	0.9	0.39	1	4.99
1.31	0	1.4	0	0.3	0	1.5	0	0	0.3	0.57	0.5	0.7	1.4	3.5	1	0.96	0	0.32	4.99
0	0.8	1.33	4.99	0.4	1.6	0.95	0.04	0.3	1	0	0.5	0.15	1.7	0.41	1	1	0.4	4.99	0.19
0	1	1.4	0	0.28	1.06	1.47	0.25	0	0.01	0.4	0.2	0	1.6	4.99	1.5	1.19	0.4	0.9	0.22
4.99	0.5	0	1	1	0.93	1	1	0.09	0.16	4.99	0.51	0.3	1.7	0.5	1	0.98	0.3	0.3	1
0	5.98	1.45	0.5	0	1.89	1.1	0.16	0.4	4.99	0.4	0.6	3.4	1.42	4.99	1.4	1.6	0.42	0.36	0
0.75	0.5	1.17	4.99	0.29	0.8	1.26	0.5	0	0.001	0.57	0.41	0.15	0	4.99	1.07	0.6	4.99	0	0
0.8	0.5	1	0.4	0.32	0.9	0	0.56	0.3	0.2	0	0.5	4.99	12.7	3	0	0.9	0.41	0.5	0.2
4.99	0.499	0	0.7	0	1.7	1.1	0.3	4.99	0	3.5	4.99	0.2	4.99	4.99	1	0.74	0.4	1.01	3.03
1.2	0.3	2.3	0.5	0.11	0	5	0.2	4.99	0.5	0.5	0.38	0	1.4	0.48	1.1	1.01	0.5	0.6	1.4
0.8	0.6	1.58	0.5	0	1.31	1.4	0.6	0.2	0.3	2.5	4.99	4.99	1.51	0.398	1.1	0	3.11	4.99	0.217
38.5	0.47	1.67	16.3	0.6	4.99	1.29	0	0.24	0	0.6	0.5	4.99	4.99	0.36	1.1	1.33	0.4	0.8	0.6
1	0.1	1.41	0.42	0.44	0.567	0	0.3	0	0.01	0	0.5	0	1.5	0.2	1.25	1.3	0.4	1	1.1
0.84	0.44	1.32	0.39	1.1	0.7	2.4	4.99	3	0.2	4.99	0	4.99	2	4.99	0.83	1.3	2	4.99	4.99
1.1	0	1.4	0.1	0.4	0	1.3	4.99	0.2	0	0.1	0.5	4.99	0	0	1	1.3	0.5	0.4	0.3
0.6	0	2.22	0.47	0.38	0.2	2.5	0.2	1.1	0.2	49.9	0.6	0.2	4.99	0.1	4.99	1	8.15	4.99	4.99
0.87	1.3	1.25	0.64	1.7	1.6	0	0	0	0.23	0.3	0	0.04	1	3.17	4.99	4.99	0.3	0.4	4.99
1	0.54	1.6	0	0.33	0.6	4.99	0	4.99	4.99	0.05	1.5	0.49	4.99	0.4	1.35	0.9	0.4	4.99	0.14
0	1	1.2	0	0.6	0.92	4.99	0.4	0.1	4.99	0	4.99	4.99	1.4	0.62	1	0	0.6	0.4	1
0.7	0.39	1.29	0.95	4.99	0.6	1	0.1	4.99	4.99	0.41	0.4	0	0.13	0.8	1.3	1	0	0.4	4.99
1.05	0.96	2.3	0.65	0.099	0.9	1.3	0.41	0	0	4.99	0.05	1.4	91.3	2.1	1.2	4.99	0.39	0.4	4.99
1.2	0.35	1.23	1	0.3	1	1.12	0	1.2	0.3	0.65	0	4.3	1.8	0.39	1.13	86	0.3	0.4	0.4
0.8	0.6	1.13	0.6	0	4.99	0	0.1	0.2	0	0.5	0.3752	0.271	2.1	0.5	1	4.99	0.6	4.99	2.1
1	0.8	4.9	0.4	0	1.3	1.145	0.21	0	0	0.7	4.99	0.3	2	0.39	1.27	0.92	0.95	4.99	0.5
1.7	1	1.2	0.5	1.3	4.99	1.24	4.99	0.09	0.2	1	0.05	0	1.5	0.8	1.2	1	0.25	0.512	1
0.5	0.36	1.1	0.78	0.2	0.9	4.99	0.3	4.99	0	0.8	0.6	4.99	1.5	0.6	0.9	0.9	0.2	4.99	0.1
0.9	4.99	1	0.45	0.39	0.75	1.6	4.99	1.1	4.99	0.5	0.5	4.99	1	1	0.95	4.99	0	0.4	4.99
4.99	0.133	1.2	0.4	0	0	1.1	0.1	0.5	0	0.55	4.99	0.3	1.5	0.3	1	0.987	0.3	4.99	0.15
0.527	0.3	2	1.3	0.38	0.7	0.9	0.21	0.1	4.99	0	1	0.49	3.4	0.6	1.05	1	0.4	4.99	1.3
0.95	0	0.8	0.66	0	0	4.99	0	0.3	0	0.5	0.1	4.99	1.6	0.39	1	4.99	2	4.99	0
0	1	2.6	0.71	0.5	4.99	1	0	4.99	0.07	3.6	0.4	4.99	4.99	0.4	1.24	4.99	2	4.99	0.7
0.7	0	1.03	4.99	4.99	0	0.3	0	1	0.11	3.27	0.59	0.14	1.49	1	1.18	4.99	0.4	0.41	0
1.7	0.35	1.7	0.209	0.3	4.99	1.34	4.99	0.2	1	0	1	1	0	4.99	1.08	4.99	0	0.43	0.2
0.7	1	8	0.4	0.37	0.6	0	0	0.29	0	4.99	0.4	4.99	4.99	0.62	0.99	4.99	0.3	8	0.2
2.9	0	1.04	0	0	1.1	0.6	4.99	0	4.99	0.5	3.4	0.2	0.5	1.7	1	4.99	0	4.99	4.99
0.56	0.1	1.46	1	1.3	0.74	3.6	0	0.25	0.6	0	0.27	0.2	6	0.4	1.12	1	0	4.99	0.8
1.1	0	0	4.99	0.5	0	1.1	0.6	3.6	0.5	4.99	4.99	6	0.54	0.5	4.99	0.96	3.6	4.99	1.1
8	0.16	1.6	0.3	0	0.822	4.99	0.12	0.11	0	4.99	0.7	0.1	1.23	4.99	1.6	0.14	4.99	4.99	0.3
0.9	0.2	1.08	0.6	4.99	0.863	0.5	0	4.99	3	4	0	0.21	4.99	0.8	1.17	8	1	0	11
0	8	1.6	0	2	4.99	1	0.172	0.499	1	4.99	4.99	4.99	4.99	1.22	0.8	4.99	0.4	0	4.99
0.9	0.6	0	0.1	60	1.8	0	0.141	1	0.1	4.99	4.99	1	1.92	0.45	0.7	4.99	4.99	0	0
0.78	0.54	4.5	0.7	4.9	0.7	0	4.99	0	0.2	4.99	0.04	0.35	1.5	2.9	0.9	4.99	0.1	4.99	0.1
1.2	4.99	1.3	0.2	0	1	4.99	0.6	5	0	0.21	0.42	1	1.2	4.99	1	4.99	0.5	4.99	4.99
0	0.4	2.54	0.7	0.5	0.65	4.99	0.5	4.99	0.2	0.5	4.99	4	0	0.3	1.09	4.99	0.4	37	1.5
0	0.2	0	8	0.26	4.99	4.99	0.2	6	3.6	4.99	0.74	4.9	1.4	4.99	1.65	0	0.3	4.99	0.3
1	0.5	4.9	0.1	0	1	0.8	0.5	0	4.99	0	0.17	0.7	3.17	0.3	1.3	0	0.3	4.99	0.4
0.79	0	1.7	0.5	0.267	1.4	0.9	4.99	4.99	0.11	1.1	0.5	0	1.7	0.4	1	1	0.34	4.99	0
0	0.6	0	5	0.2157	0.95	0	1	4.99	4.99	3.27	0	0.2	2.048	0.6	4.99	0	0.6	0	0.3
4.99	0	4.9	0.4	4.99	0	3.45	0.5	0.22	0.26	0.21	0.6	0.2	2	0.5	1	4.99	4.99	6.33	4.99
0.9	4.99	1.3	0.4	1.2	0.7	1.5	0.22	4.99	0	0.685	3	4.99	4.99	4.99	0	4.99	0.4	4.99	4.99
0.7	0	1.21	0	0.5	3.4	3.44	0	0.09	4.99	4.99	0.15	0.5	4.99	2.4	0.5	4.99	0	1.1	1
4.9	4.99	1	0.5	0.5	0.75	0.84	0.2	0.5	5	0	0.571	1	1.53	4.99	4.99	4.99	0.4	4.99	0.19
0.8	0.3	1.477	0	4.99	4.99	1.6	3.4	4.99	0	4.99	4.99	0.3	1	0.4	0.5	4.99	0	4.99	4.99
0.7	0.5	4.9	4.99	1	1	4.99	0	0	1	0.67	1.7	0.9	4.99	1	4.99	4.99	0.5	4.99	4.99
0.78	0.22	2.6	0	1.5	0	2.3	4.99	3.44	0.3	4.99	4.99	0.1	4.99	0.44	1.16	4.99	0.4	4.99	1
0.905	1	1.2	4.99	0.37	4.99	1.26	1	0	4.99	0.47	4.99	0.1	1.9	4.99	1.05	8	0.4	4.99	0
0.9065	0.407	1.4	0	0	4.99	0.8	0	3.44	0.2	0.9	0.4	4.99	1.55	4.99	1	4.99	0.4	4.99	0.2
4.99	0.396	1	0.5	0.3	0	1.29	4.99	0.09	0.03	4.9	0.5	0.1	1.8	1	1.41	3.5	4.99	4.99	0
1.2	4.99	4.9	0.34	3.4	0.7	0.95	4.99	0.288	0.5	0.6	4.99	1	4.99	0.49	0	4.99	0.4	4.99	0
0.9	0.7	1.3	0	0.22	0	4.99	0	0.3	0	0.4	4.99	0.3	1.8	1	9	4.99	0.4	0.53	0.23
4.99	0.3	2	0.459	4.99	4.99	1.2	4.99	1.5	0	0.47	0.41	0.2	1.4	0.43	4.99	4.99	1	0.8	0.04
1	0.5	2.1	0.4861	0.5	1	0.9	0.4	4.99	3.19	0.7	0.7	0.1	1.7	0.41	4.99	4.99	0	4.99	0.22
1.3	4.99	1.8	4.99	1	4.99	1.6	112	1	0.03	0.6	4.99	0.2	1.5	0.2	4.99	4.99	0.3	4.99	4.99
1.2	1	1	1.4	0	0.45	4.99	0.04	0.23	0.374	0.9	4.99	3.5	1.68	0.15	0.4	8	0.6	0	3
0	0.6	1	0.5	4.99	0.05	1.7	0.5	0.499	0.1	1	0.6	4.99	0.96	1	0.5	4.99	0.3	0.5	0.75
0.7	0.6	3.4	0.5	0	4.99	4.99	0	4.99	0	4.9	0.6	0.1	2	4.99	1	4.99	0.4	8	8
0	1	1.4	4.99	0.04	1.29	1.17	3.44	4.99	4.99	134.96	0.5	1	1.3	0.3	4.99	4.99	0.38	4.99	0.5
0.88	0.35	8	1	4.99	3.17	1	3.44	0.3	1	0.3	0.44	0.32	1.5	1.2	4.99	4.99	0.31	0.5	2.3
4.99	3.6	0.5	1	8	0.5	4.99	0.05	0.28	0.18	0.6	0.13	4.99	1.3	8	4.99	0.9	0.1	4.99	0
0.5	0.31	1.5	0.7	4.99	3.45	1.6	0.3	0.8	0.5	0.4	4.99	4.99	2	0.5	4.99	4.99	4.99	0.1	0.1
1	4.99	0	1	0.05	0.5	3.1	0.3	1.2	4.99	1.74	1.4	2.1	4.99	0.42	4.99	4.99	1	0.441	4.99
0	0	0	0.3	0.01	1.043	1.1	0	0.3	1	0.4	0.36	0	1.68	0.4	0	4.99	4.99	0.05	4.99
8	4.99	4.9	3.4	4.99	1	1.4	4.99	0.3	0.25	2.9	0	0.2	1.3	0.3	1	0	0.3	4.99	0.2
0	0	1.8	0.35	3.17	2.3	0.5	1	0.4	0.4	4.99	4	0.15	1.4	0.6	0	1.1	0.6	4.99	0.15
4.99	0.3	4.9	4.99	0	4.99	0.7	0.34	0.499	1	0.9	4.99	0.2	1.6	0.2	4.99	8	0.31	4.99	0.1
1	1	1.4	0.5	3.36	2	2.05	0.5	1.1	4.99	0.4	4.99	0	1.6	4.99	4.99	4.99	0.4	8	8
3	4.99	4.9	1	0.11	0.99	1.3	4.99	0.6	0.3	0.8	1.6	4.99	1.9	4.99	4.99	1	0.6	0.5	0.7
4.99	0.7	5	0	0.43	0.7	0	1	0.499	3	0.9	0.3	0.31	2.61	0.4	22	1.2	0.4	0.5	4.99
4.99	4.99	0.93	4.99	0.4	2	4.99	0.5	4.99	0.1	0.6	0.5	0.36	1.63	0.4	4.99	4.99	4.99	4.99	3.03
0.5	0.15	3.45	0	1.3	1	1	1.2	0.6	0.5	0.7	1.3	0.49	0	0.2	4.99	4.99	0.4	0	1
1.8	0	0.8	0.3	4.99	0.8	0.7	0.3	0.4	0.04	0.3	1.29	0.21	4.99	0.3	4.99	1	0.32	0.4	2.05
3.34	3.34	3.34	1	0	0.9	5	0.4	4.99	1.1	4.99	0.49	1	1.1	2.1	0	0.7	0.1	0.4	0.3
1.1	0.45	0.86	0.4	0.47	1.2	1.1	3	0.39	0.4	3.44	0	107	1.1	8	4.99	4.99	0.4		0.01
1	0	1.66	4.99	1	1	6.3	3	0	0.1	14	4.99	0	4.99	4.99	0	1.28	0.4		0.3
0.75	1	1.6	0.6	2	0.9	1.1	0.05	0.2	4.99	0.4	8	0.7	1.4	4.99	4.99	2	0		4.99
3.34	3.34	2.51	4.99	1	0.7	1.6	1.1	0.1	0.3	1	0.9	20	1.8	5	4.99	4.99	4.99		4.99
0.61	0.12	1.8	0.14	0.4	0.35	0.6	0.8	1	4	1	0.6	103.1	2.3	3.38	26	4.99	0		0
0.827	4.99	1.3	4.99	0.12	1.1	1	0.09	1	4.99	0.6	120	0	1.3	1	4.99	0.01	1		4.99
0.9	0.5	1.4	3.17	1	0.7	4.99	4.99	4.99	0.32	0.4	4.99	0.1	1.5	0.6	3.2	1.5	0.4		1
1.74	0	3.3	0.7	1	1.1	6.6	0.6	0.9	0	0.49	0.4	0	4.99	0.2	4.99	4.99	0.4		0
4.99	0.62	1.2	0	0.2	4.99	6	124	0.1	0.5	1	0.1	0.3	4.3	0.42	8	1	0.33		4.99
1.1	1	4.9	3.45	0.3	1.8	148	0.68	0	0	0.4	0.04	0.3	4.99	4.99	120	1.6	0.3		0.2
3.2	2	1.3	0.25	10	4.99	1	4	0	0.2	4.99	0.5	0.01	1.3	4.99	2	1.4	1		0.05
0.9	0.4	4.9	16.162	0.8	1.7	4.99	4.99	0.2	0	0.48	0.5	8	2		4.99	4.99	0.1		0.3
1	0.2	2.3	0.6	54	1	4.99	0.1	0.3	0.16	0.51	0.5	0.8	1.58		4.99	0.4	0.4		0.3
1	0.5	4.9	0	1.3	4.99	0.9	0.3	0.5	1	0.5	4.99	4.99	17		4.99	4.99	0.3		0.1
1.2	0.2	2.35	0.4	1.53	1.1		2	0	0.12	0.52	3.5	8	4.99		0		3.68		4.99
0.97	3.19	4	2	0	0.9		0	0.1	0	1	4.99	4.99	4.99		0.9		5		0
0.7	0.7	4.9	2	0.5	0.3		0.2	4.99	4.99	127	0.4	4.99	1.1		8		4.2
1.2	4.99	1.4	0.42	0.5	0.3		0.3	2.2	0.9	1.1	1	4.99	1.3		0.6		0
3.19	1	0.3	0.7	0.3	0.7		0	120	0	8	180	0	1.9		0.9		0.4
0.8	1	1.4	0.6	0.3	1.1		1.28	1	0	0.5	8	3.17	1.9		4.99		0.3
1	0.45	1.3	0.4	0.5	0.2		0.36	4.99	0.1	0.5	4.99		0		1.1		0.34
1	4.99	1.6	3.3	0.4	0.76		0	5	0.3	0.3	1		1.25		0.6		0.6
1.1	0.9	4.9	0.4	15	1.93		0.9	0	0.4	8	0.5		2		4.99		0.3
7	0	3.45	0.1	0	0.7		30	0.499	0	0.4	0.6		1.44		1.3		5.2
1.5	4.99	2.34	1	3.17	0		0	0	0.2		0.4		1.59		1.7		5
4.99	0.83	1.41	0.5	1.37	4.99		4.99	0.4	0		0.32		1.33		4.99		0.4
1.05	0	4.9	1	0.35	0.9		0	0.4	4.99		1		1.37		4.99		0.11
0	0	1.6	1.6	0	10		6	0.17	0.87		0.4		1.3		0.8		0.04
4.99	0.7	2.95	0.48	4.99	0.3		0.3	0	8		0.44		15.9		4.99		0.06
1.2	0.1	0.5	0.5	0	4.99		0.6	0.2	1		0.4		1.4		4.99		0.02
0.5	0.2	1	1	0	0.3		0	4.99	0.7		0.5		1.8		4.99		0
1	8	0.5	4.99	0	1.7		0	0.16	4.99		0.01		8		0.9		0.06
1.1	0	5	1.32	3.8	4		4.99	0.19	5		1		4.99		8		0.05
4.99	4.99	0.8	4	0.5	1.3		2.2	1	1		0.5		1.2		1.3		0.03
3.3	0.3		4.99	0	0.4		13	1	0.6		0.8		1.6		1.1		0.01
	0.5		0.7	0.2	0.7		0.1	0	0		8		1		5		0.5
	0.36		0.5	4.99	4.99		1		0.3		4.99		1.3		5		1
	4.99		0.1	2.4	5.5		4.99		0.3		0		1.19				0.2
	1.26		4.99		4.99		1		0		0.5		1.64				0
	0.43		0.4		47		0.5		0.08		0.5		1.3				0
	0		1		0.4		0.1		0		0.1		4.99
	64		0.6		1.6		0.3		0.1		0.5		4.99
	2.25		0.45		4.99		0.2		4.99		8		4.99
			1.05		4.99		0.1		0.18		0.34		1.6
			0.55				0		0.23		0.64		1.5
			4.99				1		0		0.2		1.3
			0						1		0.3		1.6
			10						1		0.4		1.5
			0						0				1.39
									0.5				4.99
									4.99				117
													4.99
													4.99
													5
													4.99
													3.17
													1.7
													2
													1.29
													8
													0.9
													1.5

## Sheet: CRP_immunturbi_high
CRP-EQA - immunturbidimetric methods, positive samples
Additional Information
This table contains the raw results of the EQA participants without any correction. Results from obvious swap of samples are highlighted in green. Results that were excluded because they exceede the calibration by > 20% in at least one sample are highlighted in orange
January 2013	May 2013	August 2013	November 2013	January 2014	May 2014	August 2014	October 2014	January 2015	April 2015	August 2015	October 2015	January 2016	May 2016	September 2016	October 2016	January 2017	May 2017	September 2017	November 2017
34.9	56.1	29.4	17	43.79	92.75	127	114	22.7	86.4	125	107	104	77.3	45.7	1	86	129.6	58	63.7
37	69	25.41	14.91	51.2	80	117	115	21.1	85	130	101	100	81.4	50.8	21.2	94.5	125.2	74.4	65.9
41.3	61.9	27	16.2	51.3	92.1	116.6	122.1	24.9	101.4	141.8	120.7	111.8	88.6	55.3	23	78	116	58.2	67.9
38.6	64	26.5	14.8	49.8	89.9	120.2	117.6	18.9	76.3	131.7	74	109.9	84.1	54	19.8	77.5	91.1	55	66
37.5	61.3	26.9	15.43	55.1	76.8	119.6	118.6	23.8	89.7	134.7	111	120	85.79	52.5	17	69.5	86	64.43	61.4
41.9	66.2	25.8	15.8	4.76	96.6	106.86	133.6	23.7	88	113	108.7	100.9	87.5	58	17.3	89.5	84.4	57.9	61.79
0.36	61.1	27.4	16.5	55.6	9.71	128.8	123.8	27.4	107.4	144	113.9	123	86.8	61.9	16.3	101	81.3	60.3	68
39.9	68.1	25.6	1.467	56.1	113	129	130	24.3	77	139.3	105.6	114	97.1	54.7	20	89	80.6	65.5	60.6
40	56.2	29	17.3	54.7	114	138	0	26	90	129	101	119.8	87	56.1	20.5	82.2	80.6	68.3	0
41.6	62	28.2	19.8	51	63	140.1	114	20	82.1	131	1	100	54.4	60	18.5	98	79.3	73	78.33
46.9	67	33	15	560	108.2	125	1440	230	89.9	153.3	90	112.4	88	68.5	17.9	93	79.3	57	60.6
37.6	57.3	27	17	54.2	97.2	132	133.9	22.1	91.6	133	103.7	116	82.8	58	18.5	82	79	56.85	78.7
35	0.42	3.4	14.6	55	91	128.9	125	23.8	90	133.1	116	108.6	82.4	58	18.4	84.1	78.9	69.8	69.1
41	68.6	24.4	16.34	61	100	125	143	26.3	98	134.5	104	52.88	97.6	55.6	21.3	45	78.2	60.96	67.5
37.8	67	28.4	16.9	46.73	91.1	144	118.8	25.1	93.4	125	114	105.4	83	46.7	18.6	92.5	78	72.4	79.5
41.87	70	28	15	61	78.5	123.3	85.5	25	92.2	154	88	112	93.2	51.8	20	90	77.8	66.9	67.8
40.7	68.9	28	15.7	51	9.5	132	129	22.2	80.8	135.8	109.23	92	82.1	60.7	17.4	86	77.3	58	62.2
40	59.6	28.8	15.24	55.9	101.5	139.3	134.9	22.7	8.75	133	87.7	119	84.3	61.1	15.9	88	77.1	57.3	82.97
41.3	78.3	25.72	20	46.4	87.7	125	113.7	22	91.2	129	10.1	107.99	92	63.5	21.2	83	76.9	66	71
36.44	60	28.1	14	54	96	138	135	23.2	78.6	148	114.5	26	78	52.5	19.7	81	76.8	50	72
33.5	57.2	28.5	15.6	51.4	0	130.6	38	21.1	96	121	99.6	102	97.1	52	21.9	80.1	76.7	61.5	77.2
38.2	54.3	25	14.1	53.5	107.97	215	134.6	27	40.4	144	115	115.7	76.4	53	19	83	76.5	56.8	66.3
47.7	62	25.9	18	53.6	84	143.54	114	23.8	95.86	137	111	104.1	87	67.9	16	81	76.5	65.99	71
36	100	24.3	15	50.5	98	141	41	28.5	83	29.6	100	113	86.1	52.4	22	87.5	76.4	61	67
40.7	63	28	16	5.5	11.51	130	145	25	100	148.49	124.43	106	100	61	19.4	79.1	76.2	60.8	66.8
34.4	69	1.21	16.2	49	88.1	145	113.7	23	78.6	111	105	100	94.72	60	19.3	78	76	67.5	86.9
41.71	69	28.2	15.82	62	10.2	125	122.6	25	83.56	138	121	117.72	85	22	19.3	70.3	76	61.7	74
36.8	67	27.2	15.6	55.4	102	125	132	21.1	94	131	99.6	94	76.4	52.67	20.4	91	76	59.9	65.5
41.7	65	63.5	15.2	50	83	141	113	21.88	87.9	156	103	104.1	87.17	57	17.7	82.1	76	61.4	58
34.4	64.8	2.7	15.2	48.2	65.7	136	133.6	24	85.9	121	107	114.6	94.3	52.4	18.2	93	75.9	71	82.7
37	54.6	28.3	14.6	49.7	82.29	122	114.8	19.9	85.6	127.89	105.73	108.7	85.4	44.38	22	86.4	75.5	56.5	73.2
42	71	26.4	1.6	43.9	68.1	131	113	22.5	92.9	131	112.8	106.9	85.8	58.7	14.4	87.1	75.5	60.2	70.1
42	64.9	27	16.2	56	10.9	118.1	139	22.2	88.4	124.1	93.7	105.8	83.4	60	21.1	85.4	75.4	57.2	67.3
38	65	26.3	15.7	5.5	110.1	131.5	139.4	20.2	86.9	135.5	96.5	95.3	85.5	51.2	14.5	73.4	75.2	58	69.9
64.5	55.8	23.6	13.9	57.3	84	137.1	117	24	104.5	133.5	110.6	116	75.9	54	20.1	82.2	75	91	67
37.9	63.3	2.7	20.6	49.4	9.17	141	136.1	24.7	78.5	128	107	104.9	83	51.2	22.8	78	74.8	54.7	70.3
34.6	61.8	28.6	14	50.1	10.5	143.1	126	20.8	87.2	137	123.5	118.2	79	54	20.7	86.7	74.6	60	0.5
37.3	66	26.8	15.6	50.2	88	124	139.8	21.4	102	150.1	105	98.4	93.3	64.6	18	85	74.6	61	71.8
38	63.5	24.5	14.4	6.3	86	132.1	118	0	78	132.8	89.3	100.7	85.5	52.6	19.8	110	74.6	57	75.5
34.7	60.5	31.7	13.7	52	91.2	134.4	126.9	22	81.4	139.8	116.7	97.1	82.2	48	15.8	86	74.1	66	83.4
46.1	59	3.05	11.2	49.9	8.58	141.2	116	19.8	85.4	182	96	103	89.6	60	15.6	78.4	74	63.8	68.1
40.4	68.5	26	14.2	46.7	105	125	124.2	22.3	98.71	1290	102	97	83	48.9	20.5	77	74	59.4	65.9
38	51.3	27	16.69	50.8	84.1	122.6	130	25.3	90	137.5	101	110	83.7	48.8	18.7	85	74	62.4	117.11
37.5	60.2	26	11.5	55.8	93.5	125	110.3	24.9	88.9	135	123	109	96	56.7	21.4	88.2	74	68.5	66.8
28.9	66.62	28.3	16.29	45.4	78	128.1	124.2	16.1	88.4	148	116	100	84	63	25.5	97	74	70	64
36	60.2	25.8	15.8	49	118.43	121	121	22.4	92.7	144.2	112	109	86.2	54.9	20	78.8	74	60.14	69.9
42.3	64.9	29.17	14	40.7	82.8	128	138.17	16.7	86.9	140.1	0.4	0.1	88	52.3	19	99.1	73.6	73.6	65.6
34.6	77.31	29.15	14.3	53.9	79	133	118	26.24	93.59	128	117	111.05	88	59.53	21.6	103	73.6	58	65.5
37.7	64.9	29.3	15	53.7	94.6	125	124	21	87	143.12	114	102	89.05	52	19	80.6	73.6	63.2	64.62
39	68	27	15.05	52	108	120.4	120	17.9	86.2	133	110.32	59.6	83	56.4	18.9	81	73.6	59	79.8
40.6	60.5	25.6	14.4	48.1	98.5	120	115	20.9	90.2	128.5	98	98.1	83.6	120	21.8	96.4	73.3	74	67.44
41.15	79	0	17.3	58	103.7	131.4	131	24.3	91.2	130.9	99.7	103	119	51.3	23	89.3	73.2	59.2	66
36.9	0.24	23.7	17.2	48.1	99.4	121.2	141	18.7	82.9	128	85.6	103	86.1	59.7	21.6	104	73	69.7	66
35.7	59.2	256	10.7	54.6	86.1	103	130	16.6	93	141	108	112	86.2	53.6	23.8	84.7	73	63.4	77.9
44	75.4	28.3	13.8	56.7	76.8	133	121.5	21.4	92.7	125.4	116	99	68	55.6	21.1	83.4	72.8	62.4	63.3
33.6	0.8	26.3	17	39.1	104	122	111.2	24.2	87.2	122	108	107.8	86	47.2	2.14	55.5	72.7	62.5	71
41	53	27.4	16.1	45.3	85.9	107	130	23.2	80.1	125.5	80	104.7	82.8	60.3	17.3	93.4	72.5	74.3	73.8
40.1	66.7	25.6	1.44	54	83.3	110	128	20.8	85.8	166.5	90.5	97.1	88.8	51.6	19	104	72.4	67.2	71
34.8	70.8	26	12.8	50.9	77.3	103.4	113.7	21.1	78.3	127.1	96.6	124	82.4	61.88	16	84	72.3	59.6	74
37	64.3	28.2	14.5	49	91.6	141	118	19.2	75.5	148.6	97.5	101.1	90	54.3	20.7	82.6	72.3	66.2	65.8
42.1	64	25.6	18.1	48.8	84.5	126	117.6	22.8	76	132	103.5	120.12	84.5	55.4	17.7	85	72.2	70.6	73.7
37	57.8	28.7	15	50.8	106.8	143.2	122.7	26	99	152.4	102	107	86.7	47.9	20.1	79.2	72.1	59.2	66.1
35.5	64.2	28.4	16.2	54	102	125.3	114.8	24	97.1	136.6	125.4	121.8	95	55	21.3	81.7	72	69.8	65.1
37.1	67	25.5	14.2	52.4	80.1	12.8	124.8	21.8	83	141.6	127.9	92.35	92.8	10.6	21.3	27	71.8	73.7	73
37.2	67.2	2.7	1.5	57.6	94	126.1	113.5	20.8	81	126.6	98.5	104	82.5	49.4	20.1	67.7	71.7	70	74
40.2	85.5	26	15	58.4	85	1400	129	22.5	75	114.9	106	98.3	81	50	18.3	88.7	71.7	67.5	69.6
42	64.9	24	14	48.2	124	119	123.8	22.9	75.6	135	105.5	101.4	88.2	56	17.7	89	71.7	53.5	62.6
37	59	31	13	51	87	122	123.4	21.5	83	130	91.8	97	72.4	65.2	14.6	1.2	71.7	73	66.4
45	55	28	15	50.6	83	12	14	21	80.5	12	100	96	85	57.5	21.3	82.4	71.6	57.5	77.928
44.1	62.5	32.8	16.3	56	74.8	137	117	20.5	90.7	145	104	10.56	28	58.2	20.7	96	71.5	59.9	82.5
35.1	75	29	16.1	53	109	139	98	17.8	100	146.5	120	118	98	55.4	20.9	79.4	71.5	52.3	69.6
35	67.5	32.03	19.36	49	101	135.6	144	24	89	134.8	124	109	96.1	51.5	19	81.8	71.4	59.6	73.4
39.9	62.7	26.6	14.1	52.5	96.6	125	134	22.7	91	129.4	115.8	96.5	88	53.2	19	63.4	71.3		77.9
44	69.9	27.7	16.9	59	89.2	140.2	128.3	21.9	97	136.9	101.2	103.8	76.4	54	21	84	71	64.3	76.2
40	66	25	14	55	95.6	133	127	23.6	90.5	136	89.9	88.7	85.3	63	17	82.1	71	65	64
35.5	60.8	25.5	14.8	51.5	91.1	130.1	127	22.8	91.1	131.5	106.5	108	82.5	53.7	22	88	70.9	63.3	76
43.6	71.8	26.6	15.1	51	102.9	118	125	22.1	89	140	94.5	106	82.1	60.5	18.3	85.3	70.6	66.5	66.1
41.8	64.6	26	16.3	49.3	96	137.1	120	24	86	151.68	110	117	86	62.8	22	92	70.5	63.23	56.9
43.8	61	34	14	50.9	84.8	30.7	109	22	112	152	104.3	110	84.2	68.2	20.1	76.4	70.5	66	77.6
37.7	56.1	26.4	14.6	52.6	118	152	71.5	31	34.5	144	120.21	116.9	108	52.48	20.9	90.3	70.4	60.6	78
40.6	61.9	50.7	14.3	51	9.86	145	128	25.7	98	150	122	11.2	9.1	43.2	15.4	81	70.3	65.6	79.5
38	38.5	29	40.3	52	30.7	135	134.2	25	97	142	120	109	95.3	56	22.5	92.2	70.1	71.2	83
37.5	71	29.7	17	49.4	103	143	32.4	25	97.4	148	11.13	113	86.3	60.5	0	87.6	70	56.8	69.8
43.9	64.6	29	17.3	57	98.6	129	145	25.3	78.38	150	111	102.49	89.6	59	15.8	94	70	62.9	71.2
41.5	68.1	27	0.7	53.3	113	146	137.3	20.32	83.5	136.35	122.4	92.8	96.1	62.97	17.5	87.4	70	58	69
34	68.1	25.4	17.3	53.4	103	123.9	138	23.9	89.32	128.5	103.05	102	81.19	52	16	80.4	69.9	66.5	67
42	70	27.5	15.6	55.6	91.74	126.5	127.42	24.13	87	135	99.5	104.7	87.5	65.2	20.1	89.9	69.9	57.3	66.71
35	60.3	26.8	15.29	53.9	93.3	118	141.4	22	76.1	190	105.5	111	89.95	60.16	0.5	86	69.7	72.5	77.2
42.5	66.8	29.18	17.1	52	86.8	127	120.9	18.3	91	137.6	94	252.36	72	53.5	21.9	85.3	69.7	66.2	70
37	67.85	28	15.4	66.1	99.2	109.7	154	24.2	98.9	106.6	102	77	58	53	20.4	80.6	69.5	60.1	64.28
41.1	67.5	29.5	18	52.4	63	139	132	18.4	85.8	140.36	104.6	117.6	23.2	55.3	17.7	85.5	69.4	54.1	68
31.7	66.2	24.8	16.23	51.75	91.5	113.2	98.3	22.4	78	120	78.1	116.1	91.83	56.7	20	1.4	69.1	73.6	72
35	74	27.7	12.8	48	77.2	112.8	125.5	21	100.8	129	115.67	95.2	85	48.9	17.6	80.8	69	72.7	64.14
39.9	61.6	27.6	16.5	52.7	93.1	120	107.4	22.1	87.6	150	120	98.1	98.2	61.7	17.6	82.9	69	58.4	74
43	63.7	24.4	15.7	40.2	87	106	119.5	20.1	92	14.76	98	105	81.5	62.2	15.5	101	69	65.06	70
39	65	26.5	13.9	50	83.2	145	119	21.9	82.7	0.5	119.2	70.4	80.4	61	20.6	80.9	69	86.9	74.4
42.4	63.96	25	14	51.2	100	126	108.7	21	84.6	130.3	121	96	87.4	50.3	19	98.8	68.9	72.25	72
38.3	61	2.8	13	49.4	55.1	140	128	22.9	82.1	131	119.1	103.9	82.9	52	18.2	77.4	68.7	58.8	69.8
38	70.6	27	1.5	42	92	125.5	120	19.7	77	143.4	104.5	105	77	61.3	16.4	80	68.5	72.38	68.4
41.7	73.9	28.7	16	5.4	83	103.4	137.6	2.6	99.5	174	102	111	92.6	72.3	15	84.9	68.4	64	66.8
39.2	58.4	27.6	1.62	60	102.2	140.5	123	33	92.5	170	103.5	99.1	89.5	47.7	18.7	95.8	68.3	62.14	71.7
40.2	64.59	24.5	15.6	49.2	89.8	117.2	117.6	23.7	97.8	137.5	98	101	91	66.9	16.9	99.5	68.3	69.8	68
38	78.6	25.81	13.7	49.3	94.5	124.2	136.2	24.6	40.4	142	119	119	53.6	45	17.3	81.7	68.2	64.6	74.8
35	57	2.73	15.58	49.1	110.7	142	114.4	25.6	86.7	129	113.9	126.5	83	52.8	20.6	91.8	68	67	70.3
42	71.34	29.3	14.2	51.19	91	140	0.2	21.4	85.2	134.2	115	98	90.5	55.7	21.2	69.8	68	66.8	71.4
35	63.4	28.4	17	46.7	98.5	125.4	130	21.1	94.7	133	112.1	99.9	97.9	41.5	14.6	81.5	68	6.69	67.3
42.2	66.1	27.1	16.5	53.6	86.3	142	140	21.6	86.4	94.5	101.3	113.62	101.2	65	18	79.9	68	57.4	83.8
0.8	68.3	28.6	15.1	48.6	93.7	171	113.7	24.96	98.9	151.63	103	119.4	87	70	19.2	81.1	68	60.7	80.1
35.6	65	27.2	16.2	52.4	96	125	146	24.2	50.8	149.9	99.1	82.9	84	32.83	18.2	69.3	67.9	30	63.6
38.01	87	31	19.8	53.4	83.1	136	174	20.4	86	141	118	94	95.5	54.3	19.7	91.6	67.8	99.8	75
35.3	66.8	32.7	19.4	52.5	92	142	0	22.1	97.9	133.9	115.5	87.7	79.2	52.8	13.2	8.75	67.8	75	0
41.7	66	28	13.3	46	112	123.3	130.3	6.6	90	133	102.5	101.7	84	51.9	15.6	81.7	67.7	70.133	68
40.8	47.4	29.8	15.5	61	89.9	100	236	23.1	87	1350	121.8	104	110.9	53.4	17.4	83.3	67.6	71.4	72
36.6	61	2.79	16.3	51	102	115.7	136	22.1	88	116.2	115	104	76	512	15.7	41	67.6	55	67.4
36.2	6.4	25.8	14.1	55	104	139	130.6	21.9	74.5	136.3	106.9	115	83.9	52.5	15.4	50.6	67.5	67.3	65.51
44.2	67	2.97	23.6	55.4	103	123.6	113	23.5	78.2	136	104	102.1	81.7	68.5	20.8	102	67.2	66	77
47.8	62	25.9	15.5	52.2	93.1	139	133	24	102	119.7	105	100.8	89	47.55	14.5	99.3	67.2	57.9	63.6
43.9	65.1	27.8	16.7	56.7	85.6	139.2	119	20.4	85	139.9	112	96.5	92	68	20.7	98.3	67	63.8	69.4
42.4	72.5	26.3	14.85	51.7	95.5	125.7	138	21.2	82	127.7	118	105.1	87	55.3	18.1	92.7	67	60	65
36.3	13.3	0.287	16.5	53.4	86.9	10.72	137.56	20.8	84.4	124.3	99	104.1	82.7	49.8	17.7	73.7	67	65.2	67.8
36.8	74.3	25.6	16.2	51.6	104.2	123.3	126.7	21.4	79.1	131.1	98	103	80.8	52.6	16.8	86.5	67	69.5	71.4
40.2	66.7	2.68	15.4	55.3	109.8	123.8	119	21	87.4	133.7	96.9	111.8	844	50.4	18.3	87	66.9	60.9	68.9
36.3	73.5	25.6	15.4	59.28	92.1	124.7	134.2	22.9	76.1	137.7	103.1	92	9.3	62.2	19.6	88	66.8	59.6	82.7
37.8	67.52	28	14.8	53.9	83.1	12.84	133.7	24.4	86.5	1.58	92.6	99	83.9	62.6	18.5	97	66.7	67.36	68.7
42	62.6	25.1	12.3	49.6	9.6	1370	136.1	24.9	90.5	113.5	105	102.5	91.9	55.5	18.8	84	66.7	69.6	81.5
41.5	67.7	28.7	17.83	50.6	99.9	140	135	20	99.2	134	934	103	89.5	56.6	18.1	86.4	66.3	57.7	71.7
37	50.7	27	14.2	49.5	84.3	117.9	124	23.7	39	148	105	95.45	91.8	48.3	21	82.3	66.3	58.2	7.32
48.9	69.1	34	15.93	56.9	89.8	127.7	131.9	22.47	100	132.9	1310	116	84	30.7	19.3	85.6	66.2	68.8	67.83
39	64	26.87	14.16	49.1	83.4	120.8	127	23	100	127	98.9	111.3	85	49.5	19.2	89	66.2	65	72.8
41.1	72	34	17	55.6	97.4	116.96	137	24.71	85.3	128	113	103.6	97	59	18.9	93	66.2	74.2	80.6
35.7	60	26	16	54	111	1390	128.9	21.1	96	135	100	11.2	85.5	52.7	13.5	71.8	66.1	60.8	76.8
40.2	72	26.9	16	53	117	121.7	116.4	24.3	84.31	129	118	104	83.1	56.6	21.5	78.6	66.1	68.4	70.2
41	64.3	26.7	14.5	46.4	89.3	130.8	116.9	21.95	78	126.9	102	111	84	60	20.7	97.2	66	64.5	68.1
41	64.4	25.8	16	53	117	133	113	22.6	90.7	155	106	1094	85	60.1	0.88	96.5	66	68.97	0.5
37.2	64	27	14.6	50.8	78.7	70.3	93.07	25	88.6	141	115.9	101.7	94.2	54.1	23	71.9	66	65.2
41	63.9	28.6	15.1	50	79.6	131	140	24.7	89.65	121.4	109.5	105	85.2	22		86.4	66
35	67	27.1	15.6	13.79	86.4	114.93	120	19.5	98	125.5	99.1	110	85	58.1		95.6	66	59.95
36.8	56.2	29.1	17.4	53	19.16	141	125.6	22.8	90.6	118	100.3	117.8	61.9	61		90.1	66	55
34.7	55.09	26.9	0.7	50.6	100	125.7	124	17.5	73.9	151	116	99	74.3	55		92	66	71.2
36.2	62	31	15.7	54.9	87.2	131	87.9	23.3	85.2	102.8	112	91.3	82.3	51		92.7	65.9	68
38.6	67.2	26.38	16.6	51.4	94.2	128	132	26.5	82.4	133	101	104.9	85	38.8		78.5	65.7	64.7
40.3	70	28.5	14.1	53.8	95	128	118.66	16.2	100	130	103.7	111	83.9	48.85		97.1	65.6	60.6
41.9	59.1	26.1	15.9	48.4	69.9	131	151	23.1	887	150	132	160	85	62.4		98.9	65.6	67.2
42.2	75.2	25.5	15.5	61	99	128.24	127.8	24.7	87	144	127	117	95	57		80.7	65.4	63.8
40.6	64.8	25.8	16.2	51.57	94.36	130.4	146	25	91	127	104.7	95.18	88.3	53		82.2	65.3	59.1
39.4	64	29	19	566	101.45	144	138.3	27.6	93	129.1	106.9	104	76.9	53.4		44.7	65.3	69
46	65	27.45	16.26	52.5	89	134.3	116	22.6	95.8	147.5	111	102.9	56.9	60.2		82.3	65.2	53.9
43.72	66.5	28	16.4	53	89.7	120	120.1	22.3	88.5	13.47	115	109	98	58		93	65.1	66
44.6	64.7	28	14.92	53	84.1	126	124.6	21.2	80.4	125	119.5	100.9	101.6	62		88	65.1	67
37	63.8	27.95	14	5.86	84.6	106	118	20	98.2	96	103	105	85.8	54.5		35.3	65	60.6
34.5	70	26.1	15.2	55.9	94.7	138	120.5	23.7	102	144	89.2	76	83.6	50.6		81.6	65	67.2
38.2	65	26.6	15.9	49.9	87.02	108.2	143	24.1	87.1	133.92	118	98.6	82	53.8		83.2	65	68.1
41.9	59.6	28.2	15.7	51.8	93.2	123.3	130.8	22	90.2	120	123.5	56.9	95	56.1		90.9	65	71
38.7	65.5	22.1	15.7	63	100	130.5	111	26	145	135	112	95.5	84.79	59.2		80.4	64.9	65.2
1.5	54	25.6	15.7	55	99.9	141	120.5	23.86	110	131	96	0.6	89.6	52.7		0.82	64.9	59
41.3	70.8	27.8	15.5	47.9	95	181	117.8	20.7	90.69	14	126	101.8	82.9	57.2		90	64.9	62.5
40.9	72.1	29	14.5	52.9	79.7	128	108	22	4.5	125.3	106.02	103.5	86.3	46.1		81.9	64.8	60.4
36.7	62.6	18.7	14.8	48.1	5	118.4	85	22.8	89	138	98.8	95.4	90.9	65.2		84.6	64.8	64.7
42	69.1	24.3	16	50	90.4	143	89.7	24.2	82.3	140.2	102	110.1	90	58		81.4	64.7	0.2
37.8	67	26.4	12	55.4	71.1	116	136.1	25.6	86	148.3	155.5	103	90	87.6		90.9	64.7	0
39	69.7	28.9	17.7	43.1	84.3	132	129	24.2	85.3	137.3	111.4	98.9	90	57.7		92.5	64.7	64.4
41.9	64.05	27.7	12.1	49.5	103.5	96	139	21.9	87.5	120.8	94.1	102.1	87.35	51.7		95	64.7	69.7
33.4	67.9	30	14.2	55	103	144.3	122	21.4	90.2	129	112	106	78.1	47		98.9	64.4	59.4
39	61	28.1	16.4	55	108	94.71	129	21.8	89.5	132.6	115	100	79.7	51.3		77.4	64.3	74.4
41	68.3	26.7	17	55	0	121	100.3	28.7	97	126.2	118	108.6	85.9	64.3		77.4	64.3	67.21
40	68.8	27.11	15.3	52.1	86.5	143	136	22.9	95.2	127	104	117.7	86.4	58.9		80.2	64.2	70
42	63	28	15	48	10.84	113.3	149	23.6	86	134.6	105.1	102	85.5	59.2		91.5	64.1	58.9
42.9	51.28	26.9	14.1	61.2	96.6	130.3	12.84	20.3	81.1	125	104	120.8	85.6	17.9		90.9	64.1	80.3
38.1	67	26.7	15.2	51	110.6	330	131	23.3	85.3	141.5	106	120	78.1	53.6		100	64	61.4
40.2	77.6	26.2	14	54.8	85	124.9	96	19.5	89.1	145	103	103.3	86.2	57.9		97	64	67
39.6	61.4	2.92	17.3	46.6	92.8	138	136	20.3	89.3	135.1	103.7	933	79.4	60.35		91	64	69.2
46	73.9	28.9	18.3	55	101.99	99.2	126.33	21.6	92.2	132.9	103.7	103	97.9	39		88	64	6.91
36	98	32.1	20	56.7	82	120.9	134	24.2	91	131.5	65.8	95.68	84.9	75.05		96.4	64	54.9
41.3	66.5	26	14.59	49.6	103.7	127	117	24.85	57.9	137.1	103	111.5	83.4	50		89	63.8	60.2
39.05	64.5	28.7	17	53.3	95.3	121.3	140.8	21.5	72.7	132	107.5	99	87.9	59.4		84	63.7	58.5
38.1	61.2	25	15.6	48.5	92.2	133.8	133.7	24.2	81.4	141	124.1	104	79	69.2		82.1	63.7	68.07
43.1	66.7	28.3	15.9	49.4	162.5	136.5	120.2	24.4	104.2	110.6	116.3	117.9	83.8	54.1		91.3	63.7	72.7
35.4	58.1	24.3	15.9	5.58	90.1	128.5	155.5	20.2	89.2	130.8	112	103	87.9	53.7		9.54	63.6	71
40.6	73.3	26.2	1.58	60.8	104	124	115.6	17.7	86.9	136.8	98.1	116	96.6	61.5		78	63.5	70
0.9	60.2	28.7	17.6	50.5	94.7	123.1	127	24.5	86.3	133	110	107.1	98.6	60.3		96.5	63.4	67.5
41.1	61.9	25.9	18.4	56.4	95.3	144	118	21.4	90.3	151.2	107.5	116.5	78.7	48.62		86.6	63.4	71.8
40	69.4	5	13.9	52.6	82.2	128.9	125.3	23.5	90.4	120	107	99.83	86.8	56.5		97.7	63.4	69.3
44.4	62.2	27.9	16.6	52.4	88.5	127	118	19.1	92.6	127.1	97.2	88.4	83.1	61.364		91.8	63.3	72
36	5	24.5	14.5	55.7	99.2	122.1	13.2	20.5	86.6	134	109.3	108.88	86	58.9		89.3	63.3	65.4
40.9	65.2	28	16	50.5	98.2	137.8	128.8	24.41	88.8	126.6	114.3	113.3	83.97	51		83.9	63.2	67.8
35.3	59.3	25.1	14	55.6	97	130	121.5	19.6	97	133	96	103	85.7	58.4		96.8	63	66
43	67.2	28.8	14.3	45	79.8	126	127.7	24.2	84	135.8	122.6	100.6	76.2	62.1		85.8	62.8	48
38.3	61.2	28.7	16	54.8	83.9	144	120	30.6	98.6	195	120	102	103.5	40.91		14	62.7	66.6
36.4	68.4	26.8	14.2	50.1	102	135	116	21	71.2	132	98.7	118.31	87	58.78		93.8	62.7	60.4
40.8	68	26.8	16.76	50	97.4	135.7	136	24.28	81.4	129.32	113.7	110	84.68	58.6		91	62.7	74.6
37.5	68.16	28.1	14.1	59.3	100.2	118	125.2	24.9	88.15	148	82.5	98.13	91.8	47.3		91	62.7	77.5
25	70.9	28.6	16.5	52.9	83.7	137	127	23.9	84.4	131.1	102.5	104	84.5	56.5		98.1	62.6
39	66	28.1	14.8	54.6	98.7	110.6	119.3	23.5	88.3	136	108.7	82.6	81.8	51.3		91	62.6
35.15	70.7	28.2	1.3	50	97.34	118.7	67.1	20.2	117	133	143	95.2	84.1	39.6		87.7	62.6	0
40.7	64.6	29.1	15.8	53.2	87.1	138	121	25.5	98.24	147.8	106	105.7	83.5	65.1		73	62.6	61.9
35.7	65.3	29.1	15.9	54.36	105	124.5	113	24.5	82	134.2	107	102.2	88.5	17.9		109	62.6	59.8
40.2	53.7	28.9	15	46.1	91.6	131.4	136	23.6	86.7	130.11	117	109.7	90.7	5.8		89.5	62.5	60
40.8	68.5	23.7	15.8	54.4	76.7	100	122	22.02	102	133	105	111.1	86.42	61.5		82.5	62.5	65.5
41.1	66.2	24.3	16.1	54.3	94.2	143	134.5	21.4	83.6	149.7	114	12	86.82	53.5		79.2	62.5	73.1
36.9	70.3	27.9	15.8	55.6	108.1	134	110	24.21	87.9	142.7	114.2	110.5	90.897	55.3		102	62.5	65.9
39.6	63.6	24.9	16.9	49.2	67.9	127.4	135.8	25.28	80.5	144	106.3	104	89.8	58.9		0	62.3	76.8
43.4	70.4	26.7	15.3	60.6	88.8	139	108.7	23.5	88.2	145	105.13	105	79.8	49		78.8	62.3	66.7
39.9	69.9	28.9	16	44.3	98	125	118.1	23.2	91.9	123.5	99.9	109	79.8	52.5		75.9	62.2	7
41.3	66	28.18	15.2	50.7	89.3	124	136	25.4	93.4	0.2	123.32	99.8	88.8	54.4		76	62.2	73.3
17.4	68.6	27.6	14.9	54	89.6	135.3	127	26.33	89.8	139.61	115.7	98.3	94.5	54		89.6	62.1	61.6
19.4	67.01	32.4	14.7	54.39	100	137.6	124.6	25.7	90.3	120.8	110	93.4	90.5	63		118	62	55.9
34.4	66.7	32.59	16.3	50.5	108.86	121.3	100	23.91	85.8	125.8	116.9	131	87.1	58		105	62	55.9
36.2	66	28	8.8	67.3	82	135	144.15	31	84.1	121	118.1	116	83.21	53.69		86.4	62	63.9
43.7	72	34	14.9	58.03	86.4	141.36	128	24.3	100.59	135.7	115	117.65	790	56.1		7.5	62	67.9
34.9	71.5	29.2	0.5	49	117	143.1	124	21.3	94.5	138	100.67	118.9	849.4	5.8		81.8	62	62.2
1	70.56	26.4	16.6	53.38	101	105.3	137	22.3	93	135	101.34	124	78.3	65.6		85	62	66.81
38.7	63.5	27	15.9	53	102	148.78	118	24.6	91	126.1	109	118.2	89.9	66.8		77.9	61.9	54.3
34.76	61.9	28.25	18.5	49.5	87.4	142	114	21.8	93.1	122	95.4	117.5	77.8	55.19		77.9	61.6	53
37.8	66.8	26.65	16.3	58.26	96.6	117.27	118.1	18.4	10	145.3	116	105.5	95.5	68.1		79.3	61.6	64.8
42.7	61.5	28.5	14	53.9	93.2	122.93	128	24.1	75.7	128.2	104	81	86.8	38		94.2	61.4	64.7
36	64.3	27.5	16	51	101.5	130	128	19.4	78.05	12	99.7	113	8.61	28.1		83.3	61.4	63.5
41	53	25.6	16.1	56.35	94.3	140.1	136.7	21.5	89.16	133	117	109	1.2	60.6		81	61.4	57.9
40.5	65.5	29.3	15.1	55.3	80.85	157	127.6	22.9	86	130.1	110.3	104	87.1	66.9		97.9	61.3	63.6
43.4	69.19	28.3	15.5	51.28	93.4	131.6	0.04	22.8	85	129.15	12	93.1	86.6	54.1		74.7	61.3	68.5
40.8	71.1	27.26	16.3	51	128.503	129.4	108	25.32	96	130.5	111	106	87.7	56.87		82	61.1	69.8
35.5	63.3	28.4	14.3	55.203	107.8	108	140.74	25.9	86.6	148.6	107.15	102	80.1	60.1		85.1	61	60.9
43.4	69	26.24	16	57.5	94.2	114.4	150.8	22.4	80.6	129.5	104	115.3	82.3	61		78.2	61	59.9
42.6	57.1	26.7	16.4	56.4	107.9	118	117.8	20.1	98.1	127.3	107.1	100.2	84.7	64		76.4	61	60.9
38.5	66.1	28.738	14.2	56.8	102	117	148.6	20.3	80.3	130	114.9	98.32	95	52.35		86	61	52.1
41.796	68.3	30.1	15.1	56.4	98.3	110	133	29	7.27	131.2	116	107	86	42.3		91.1	60.9	62.73
39.3	70.4	25.5	15.6	56.6	89.4	122	119.3	25	100	64	99	104	79	56.5		93.7	60.9	57.1
36.6	69.3	28.8	15.28	56	99	87.8	119	21.8	116	150	99.4	121	95.2	53		85.8	60.9	60.9
41.5	110	27.2	16.3	56.4	76.4	128.4	145	23.05	81.8	145	96	103	83.84	64.8		79.1	60.3	59
43.5	65	29.85	17.343	62	90	129.7	139.5	24.62	82.1	147.25	83.31	119	95.9	52.2		88.3	60	60.9
44	68.23	27.4	17	49.8	91.9	140.19	135	25.5	90.91	150	124.3	100	89.6	57.3		83.4	59.9	65
40.7	70	27	16.1	54.15	85.8	132	120.3	27.5	33.1	163	123.53	107	70.5	58.6		88.1	59.7	66.9
67	67.4	24.81	16	51.4	93.4	118	123.4	22.95	88.9	140	127	100.5	97.5	41.3		78.7	59.5	60.4
38.1	59.9	28.23	14.9	45.1	73.2	114	120.8	24.34	79.4	152.6	120	98.3	81.8	69.5		82	59.4	58.2
36.5	71.8	27	16.4	51.3	92.9	147	75	25.3	78.7	149.7	113.2	100	91.3	50.3		77.9	59.3	62
41.1	66.9	28.1	15	42.2	85	141.41	125	21.2	60	135.7	125.2	83	84	77.7		89.9	59.2	59.2
34.6	69.2	24.7	17.8	54.2	100.8	1533	119	19.4	93	93.5	120.7	103	80	61.5		82.6	59	60.35
41.4	57.3	25.9	16.3	52.7	80.3	131	155.6	16.2	79.1	127	106.68	129.05	95.1	53.3		79.7	58.5	57.9
37.1	61.1	26	24	49.3	48.7	147.4	93.8	14.9	96.7	115.3	95.1	106.7	74.35	50.5		93.9	58.5	59.2
43.3	69	29.1	17.7	55.9	99.9	147.5	118	23.5	97.4	142	120	109	79.4	50.6		78.9	58.5	71.9
34.5	64.6	30.4	15.7	54.7	99.57	137.2	122.8	22.8	105.1	142.5	120	114	87	63		78.8	58.5	61.73
38	74	18.9	16	52.6	91.7	129.9	137.4	22.5	122	117	91.5	101	85	34.3		78.9	58.4	56.41
35.9	55.2	26.5	17	49.4	88.3	91	122	17.6	95.5	129.52	94.9	102.4	81.9	55.34		78.9	57.7	70
40.4	66	22.2	14.6	51.6	82.9	117.8	109	26.3	99.7	139.1	118	119	87.4	62.57		82.3	57.4	58.9
42.5	70.9	29	15.9	54	96.7	125.6	118.3	23.7	100.2	116	111	104.1	84.1	49		96.1	57.2	62.7
41.8	60.8	26.6	15.6	57	106.6	133	138.2	21.4	86.3	110	100.3	130.6	89.3	54.2		73	57.2	65
36	65	25.8	12.5	56.31	109.22	125.8	5	22.23	77.6	152	119.8	110	86.6	57.9		77.3	57	67.2
40.9	58	29.2	14.8	5.42	11.29	119.3	138.75	20	92	151	109	108	87	53		99	56.9	57.98
42.4	63.3	31.8	10	63	110	135.5	140.5	22.5	92.6	0.84	102.1	117.5	80.14	59.6		81.9	56.5
35.4	65	28.9	15.7	53.8	105.8	135.4	123.2	23.8	82.4	135	118	91	74.9	56.5		79.2	56.3
44	71.3	25.3	14.5	59.5	109.9	134	138.6	25	81.5	114.3	119	115	97	49.98		85.7	56.3
35.9	75	27.3	15.8	58.1	81.7	147	142.4	26	93.5	127.8	104	116	95	62.1		91.2	56.3
39.4	70.15	27.8	16.8	49.8	85.9	133.3	122	20.89	94	130	132.31	102.8	84.59	67.4		88.2	56.1
37	69.6	27	15.9	47.5	77	129	85.9	24.4	85	139.7	109.8	116	89	55.7		82.1	56
36.8	82	27.7	14.5	38.9	73.9	130.6	108.1	22.4	81.5	127.1	117	104.8	84.7	59.2		77.6	55.4
36.9	56	24.1	14.6	37.6	72.1	138.9	108.1	20.7	84.65	135	120	110	81	46			55.3
41	59.5	28	15.4	57.8	80.3	116	121.5	17.8	93.41	138	121	116	88	64.6			54.9
40	70.55	29	13.4	46.6	89.4	119	122.3	23.9	99.8	125.9	100	96.3	90.5	57.5			54.2
42.44	71.7	29.99	16.1	49	85.3	115.8	136	22.5	84.3	149.5	107	108.6	84.6	60.5			53.2
43.2	65.21	32	13.9	43.6	99	124	117.6	26.6	105.14	119.2	87.9	0	48.2	53.7			51
55	61.1	28.8	16	54	83.9	118.8	122.2	24.5	91.5	166.5	128.9	103	87.3				50.2
33.6	53.4	27.8	15.5	53.6	89.1	141.6	121.03	22.3	86	115.6	107	88.9	86.3				44.6
43.8	62.5	27.4	17	454	93.23	124	115.3	29.9	99	147.4	122	0.5	84.9				36.7
42.307	60.7	28.8	17.63	55	88.4	96	120.6	20.2	83.19	149	110.9	85.4	105				34.3
42.8	63	25.2	15.6	54.4	76.6	83	154.17	25.1	80.5	102	115	102.5	78.9				30.7
35	68.8	29	17	56	126.76	128.7	134	23.2	94.6	144.4	114	11.48	80.8				20.1
35	65.6	26.8	17.6	52	99.8		5	14.1	84.5	147	103.2	103	93.9				7.3
31.3	67	32	0.686	6	95.72		127	25.1	74.9	0	125		84.77				7.16
36	69	24.7	15.8	52.3	93		117	24.1	100.7	132	102.1		907				7.1
40.5	64.7	28.1	15.3	45.2	104		159	24	86.7	124.7	136.8		92.5				7
36.9	80.27	30	10.7	49.1	91.5		123.6	21.91	94.8	146	123		70.1				6.82
37.3	69.6	28.3	10.7	47.3	88.5		124.9	25	89.5	126	9200		96.5				6.74
42	72	28	14.5	57.5	92.9		128	23.8	95.6	165	105.6		97				5.05
36.6	66.35	30	14.4	50.9	90.7		133.9	20.5	90.3	1	127		99.6				4.5
42	70	27.7	17	46.8	91.4		127.3	24.2	91.6	117.2	133		83.63				3
36.5	77	26	14.5	55.9	105		136.5	21.6	106	111.3	100		990				0.5
39	65.3	27.6	15.4	58	94.3		113.7	23.4	86.6	146.2	104.73		80.2				0
43.2	60.2	23.6	19	58.2	95.4		111	22	45	125	129		80.84
42	68	27.5	15	49.9	95.5		129		102.6		170		95
40.3	77.6	28.3	14.7		102		0		85		110		83.7
40	65.7	27.82	11.6		91.3		117.1		92.8		107		90.3
36.5	70.5	25.8	14.3		116		148		5.4		124		91.9
46.3	64	29.1	16.42		89.6		113.2		89		100		87.3
36.4		27.8	17		48		149		96.9		118		82.9
40.1			18		70.9		69.2		96.5		93		92.3
			15.74		109.4		146.4		0		90.6		59.5
			15				74.2		74.15		111		76
			18				125.6		99		111.5		91.31
			15.5				136		125.2		108.1		89.88
			14.8				137		84.5		106.6		95.3
			12				9.2		91.27		104		86.3
			15				117		97		111.96		73.87
			14.7						84.2				88.41
			16						100.4				88.4
			14.8						83				85.4
			13.9						81.8
			14.8

## Sheet: CRP_immunturbi_low
CRP-EQA - immunturbidimetric methods, negative samples
Additional Information
This table contains the raw results of the EQA participants without any correction. Results from obvious swap of samples are highlighted in green. Results that were excluded because they exceede the calibration by > 20% in at least one sample are highlighted in orange
January 2013	May 2013	August 2013	November 2013	January 2014	May 2014	August 2014	October 2014	January 2015	April 2015	August 2015	October 2015	January 2016	May 2016	September 2016	October 2016	January 2017	May 2017	September 2017	November 2017
0.83	0	1.9	1	0.25	0.83	1.27	0.08	0.26	0	0.46	0.38	0	1.46	0.31	18	1	0.4	0	0.13
1	0.5	1.24	0.4	0.54	0.9	1	0.2	0.01	0.15	0.35	0.4	0.1	1.6	0.55	1.5	1.5	2	0.7	3
4.6	1.5	1.45	0.4	0	0.7	2.1	1	0.8	1.3	1.5	2.6	1.5	2.46	0.9	0.71	1	0	0.4	0
0	0	1.5	1.2	0.3	0.55	1.13	0	0.23	0.19	0.31	0.39	0.29	1.46	0.33	1.2	1.2	1	0.25	0
1	0.6	0	0.45	1	0.8	1	0	0.3	0.1	0.6	0.2	0.9	1.48	0.44	1.3	0.9	1.5	3.55	0.2
1.3	0.7	1.3	0.3	0.03	1.49	1.59	1.23	0.2	0.2	0	0.5	0.2	1.6	0.7	0.7	4.5	0.1	0.2	0.16
0.01	0.4	2.29	0.68	0	0.072	1.2	0.31	0	0	0.3	0.2	0	1.6	0.6	1	2.8	0.35	0.4	0.2
0.47	0	1.2	0.046	0.1	0	4	0	0.1	0	0.8	0.3	0.1	1.8	0.4	0.87	0.9	1.5	1.5	0.2
0.87	4.8	0	0	4.8	2.3	1.1	128.7	0.1	1	0.3	0	3.9	2	0	1.4	1.6	0.6	0.7	0
0.5	0	1	4.5	0	1	4.4	0	0	0.3	0	130.6	3	1.1	0.2	1.2	1.4	0.6	0.8	0.03
4.8	1	7.5	1	10	1	1	10	10	0.5	1	0.4	30	1.6	0.3	1.2	1.5	0.7	0.45	0.2
0.8	0.4	1	1	1.5	1.8	1	0.7	0.3	0.2	0.6	0.1	0.4	1.6	1	0.73	1.02	1	0.43	0.3
1	69.35	0.1	0.4	0.3	0.7	1.2	0.1	0.6	0	0.6	0.5	0.2	2.1	1	1.12	1	0.8	0.4	0.2
1	0.9	1.2	0.48	0.4	1.2	0.7	0.3	0.3	0.2	0.6	0.6	0.14	2	0.4	1.4	1	0.235	0.36	0.17
0.9	0.4	2.3	1.1	0.28	0.68	1.5	0.17	0.2	0.2	0.5	0.6	0.5	1.6	0.4	0.9	0.8	0.48	0.5	0.3
0.97	0.7	1.5	0.4	0.3	0.7	1.15	0.1	0.3	0.23	0.7	0.3	0.2	2	0.4	1.2	0.52	0.65	0.2	3.7
1.6	0.22	1.6	0.65	0	0.1	1	0	0.29	0	0.5	0.37	0.1	1.54	0.5	0.1	0.7	0.1	0.85	0.2
1	0.3	1.48	0.55	0.5	1.1	1.4	0.3	0	0.02	0.44	0.2	0.3	1.59	0.6	0.54	1	0.1	0.5	0.05
1.2	0.4	1.15	0.5	0.4	0.8	1.2	0.2	0	0.2	1	0	0.2	1.1	0.6	1.2	1	0.9	1	4.99
1.02	0	1	0	0.1	0.39	0.64	0.07	0.5	0.3	0.6	0.6	0.2	2	0.5	0.6	1.15	0.5	4	4.99
0.73	0.51	1.4	0.5	0.2	1	1.1	0.2	0.2	0.01	0.7	0.4	0	1.9	0.44	1.4	1.2	0.4	0.4	0.1
0.7	0.1	1	0.4	0.7	0.59	1.3	0.07	0.04	0.1	0.14	0.09	0.2	3.2	0.2	3	1	0.6	0.3	0.1
1	0.17	1.6	4.99	0	1.4	0.99	0.2	0.3	0	0.5	0	0.1	1	0.8	8	1	0.46	0.26	4.99
1	1.2	1.3	1	0.5	2	1.6	1	0.4	0.4	0.6	1.1	0.03	1.8	0.5	0.8	1.55	0.2	0.4	0
1.2	0.4	0.75	2	0.01	0.06	1.45	0.1	0.1	0	0.236	0.2	0.2	1.3	0.21	0	0.9	0.16	0.4	0.2
0.8	2	0.12	1.1	1	0.37	1	0.2	0.4	0.3	0.5	0.7	0.1	1.44	1	1.3	0.9	0.8	0.7	0
0.49	0.9	1.8	0.4	2	0.2	1.2	0.19	0.1	0	0.7	0.2	0.05	1	0.5	0.67	0.9	0.5	0.5	1
0.8	0.4	1.6	0	1.4	1.9	1	0.8	0.2	0.6	0.5	0.4	0.2	3.2	0.234	1.6	4.99	0.2	0.4	0.13
1.4	0.4	2	0.5	0	0	2	0	0.13	0.11	0.2	0.5	0.1	1.61	0.8	0.6	1.2	0.6	0.4	0
0.8	0.33	0.2	0.5	0.3	0.8	1.5	0.2	0.8	0.3	0.7	0.4	2	1.9	0.5	1.16	4.99	0.1	4.99	0.3
0.8	0.3	2.2	0.3	0.4	0.73	0	0.05	0.27	0.12	0.37	0.27	0.2	1.8	0.97	1.3	0.9	0.5	0.4	0.2
2	1	1.28	0.1	0.2	0.7	1.1	0.2	0.3	0.3	0.9	0.5	0.3	1.6	2	1	1.1	0.61	0.6	0.1
1.2	0.2	1.3	0.7	0.1	0.1	1.3	0	0.2	0	0.35	0.45	0.3	1.7	0.5	1.3	1	0.51	0.5	0.2
1	0.4	1.12	0.2	0	1	1.1	0.3	0.1	0.2	0.6	0.5	0.3	1.7	0.5	1	0.8	0.38	0.4	0.1
0.9	0.3	1.1	0.6	0.4	0.7	0.7	0	0	0.2	0.2	0.1	0.1	1.5	0.4	0.9	1.1	0.6	0	0.3
1	5.4	0.2	15	0.1	0.7	1	0.2	0.4	0.1	0.5	0.4	0.1	0.87	0.4	1.4	1	0.68	0.5	0
0.7	0.9	1.7	1	0.2	0.11	1.5	4.8	0.25	0.2	0.4	0.5	0.3	1.5	0.4	0	1.4	0.6	0	73.7
0.8	0	1.4	0.5	5.1	1	0.95	0.6	0.2	5.4	0.7	0.4	0.1	1.9	0.7	2	1	0.6	0.6	0.2
0.95	0.4	1.2	0.3	0.05	0.6	1	0	0	0	0.4	0.4	0	1.7	0.6	1.32	1.9	0.6	0	0.19
0.8	0.4	11.9	0.3	0	0.74	8.8	0.2	1	0	0.4	8.1	13.2	1.6	0.4	1.09	0	0.57	0	0.5
4.3	0	0.1	1	0.4	0.1	1.5	0.1	0	0.2	4.9	0	0	6.1	4.8	1.18	0.9	0.4	0.4	0.2
0.7	0.5	2	0.4	0.3	1.8	1	1	0.21	0.03	10	0.4	0.2	1	0.4	1.6	1	1	0.4	0
1	1	1.3	0.53	0.3	1.1	1.3	0.5	0.07	0.7	0.4	0.4	0.08	1.5	0.4	1.2	0	0.2	0.5	0.29
1	0.4	1	2	1.2	0.7	1.2	1	0.51	1	0.5	0.17	4.99	1.27	0.5	1.4	0.72	1	0.25	0.3
0.7	0.45	1.8	0.29	1	1	1.1	0.2	1	0.2	0.2	0.2	0.2	4.99	0.2	5.3	1.4	0.5	0.5	0
1	2	1.1	0.4	0.3	0.89	1.7	1	0.2	1	0.95	4.99	4.99	1.5	0.6	4.99	0.89	1	0.35	4.99
1.2	0.4	1.47	0.25	1	0.6	1.1	0.22	4.99	0	0.5	107.3	105	4.99	0.3	4.99	1.43	0.5	0.75	0.4
1	0	1.41	0.3	0.23	1	1.32	0.1	0.24	0.2	0.3	4.99	0.21	1.5	0.53	0.8	10	0.8	4	0.2
1.2	0.3	1.2	0	0.3	0.7	1	0.2	0.1	0.2	0.45	0.4	0.4	1.65	0.4	4.99	1.4	0.6	1	0.17
1.6	0.6	1.35	0.2	0.4	0	1.1	5	0.1	0.2	0.6	0.58	0.2	1.5	0.3	1.2	1	0.5	0	0.5
0.6	0.3	1.1	0.2	0.2	0.7	4.99	0.3	0.3	0.2	0.4	0.5	0.1	1.5	4.99	0	0.5	0.9	0.7	1.29
0.87	0	0	0.2	0	0.5	1.1	0.3	1.1	0.2	0.5	0.4	0.5	5	0.4	4.99	1.5	0.7	0.08	0.13
1.1	54.8	1.1	1.1	0.2	1.8	0.8	0.9	1.2	1	0.6	0.4	5	1.6	0.8	1.2	3.2	0.6	0.2	0.2
0.7	0.3	8	1	0.1	1.2	1.4	0.4	1	4.99	1	0.2	4.99	1.8	0.4	4.99	1.1	1	0.4	0.5
0	0.2	2.2	2	1.1	2	1	1.2	0.22	0.4	0.5	4.99	0	1.4	0.6	1.2	1.2	0.5	0.28	0.1
0.8	68	1.4	1	1.2	2	1.2	1	1	0.3	0.4	1	0.2	4.99	0.3	0.14	1	0.6	0.5	4.99
0.4	1	1.4	0.4	2	0.8	1.2	1	0.3	0.1	0.5	0.5	0.1	1.7	0	0.9	1.3	0.99	0.7	0.4
1.1	2	1.2	0.04	1.2	0.8	0.8	0	0.2	0.1	0	0.2	0.1	1.6	0.4	1.1	1.2	1.1	0.7	8
1	1	1.4	0.5	0.2	0.9	1.2	0.1	0.1	0	0.6	0.3	0	1.6	0.27	4.99	2	0.567	2	0
1	0.4	2.4	0.4	0.2	0.8	1	0	0	0.2	0.2	0	0.3	0	0.4	1.7	1.1	0.5	0.8	0.1
1.1	0.499	1.4	0.05	0.5	0.8	1	0.3	0.2	0	0.4	0.5	0.02	1.6	0.4	1	1.3	1.8	0.5	1
1	0.5	0.5	0.2	0.3	0.4	1.2	0.4	0.3	0.1	0.2	0.4	4.99	1.7	0.5	1.3	0	1	4.99	0.2
0.9	0.4	0.5	0	1	0.4	1	0.1	0.4	0	0.2	0.7	0.5	1	0	0.786	0.9	0.02	1.8	0.2
0.7	0.8	1.2	0.4	0.4	0.65	0.1	0	0.2	0.1	0.5	0.2	0.1	0.7	59.7	2.1	1.2	1	0.6	2
1	0.3	0.1	0	0	1	1.1	0.1	0.2	0	0.5	0.35	0	1.5	0.4	1.26	1.43	0.13	0	1.52
1.1	0.2	1.3	0.2	0	0.8	10	0	0	1	0.49	0	0.2	20	0	1.2	4.99	0.1	1.2	0.3
1.7	0.4	7	0.3	0.3	0.8	1	0.1	0.3	0.24	0	0.4	0.25	1.5	1	1.2	0.6	0.5	0.75	0.15
1	0	1.2	0	0	1	1	0.18	0.21	0	1	0.37	0	1.57	0.8	1.13	85	1	0.75	0.08
0.5	0.3	1	1	0.5	1	0.9	0.1	0	0	0.05	0	0	1	0	1.7	0.5	0.6	0.5	0.068
0.6	0.5	1.3	0.8	5	0.9	1.5	0	0	0.5	0.6	0	0.049	1	0.4	1.6	1.4	1.25	3	0.3
1	0.8	0	0	0.3	1.1	0	0.5	0.5	0.2	0	0.5	0.4	1.1	0.4	0.7	0.6	0.31	4.25	0.2
1	0	10.31	12.86	0	0	1.1	0.4	0.4	0	0.4	0.7	0	2.2	0.4	4.99	3	0		0.7
1.2	0.2	1.3	0.3	0	0.7	1	0	0	0.2	0.4	0	0.3	0	0.4	4.99	4	0.4		0.07
10	1.1	2.4	0.8	0.5	0.7	1.1	0.2	0.2	0.2	0.45	0.4	0.2	1.5	0.5	1.7	2	5	1.2	0.24
9	1	1	0	0	0.7	1	0.2	0.2	0.2	0.5	0.4	0.1	1.6	0	1	1.1	0.4	1	0.2
0.7	0.4	1.2	0.4	0.3	0.8	1.4	0.1	0.2	0.3	0.7	0.3	0.1	1.6	0.19	4.99	1	0.5	0.15	0.3
2.5	0.5	1.8	0.4	0.3	1.6	1.3	0.2	0.3	0.7	0.6	0.4	0.3	1.5	0.6	1.44	1.1	1.2	0.9	0.19
0	0.7	1.3	0.5	0.2	0.9	1	0.8	0.5	0.3	0.29	0.5	4.99	1.7	0.5	1.3	1.55	1.2	0.38	0.1
2.6	0.4	4.9	0.4	0.3	0.8	3.1	0.2	0.3	4.99	4.99	0.4	0.1	1.5	0.7	1.2	1.01	1	1.4	0.3
0.8	0.4	1.3	0.3	0.9	4.99	0	0.1	4.99	0.5	0	0.18	0.03	4.99	0.38	1.5	1.3	0.47	0.34	4.99
1.3	0.4	8.1	0.5	0.3	0.07	0.98	4.99	1.7	1	0.19	4.99	0.04	18	0.74	1	1	1	0.72	0
1	1.6	2	21.6	4.99	1.9	1.4	0.2	2	0.2	0.6	0	0.2	1.3	4	1.5	0.6	0.2	0.5	1
0.8	0.09	1.1	0	0.2	1	4.99	0.2	0.07	0.09	0.5	0.06	0.5	1.7	0.9	0	1.31	5	0.5	1.8
0.1	0.3	0	0.15	1	0.8	4	0	0.3	0.1	0.75	0.55	0.1	1.9	0.1	1.25	1.2	0.5	0.4	1.7
1	0.4	1.74	16.2	0.06	0	1.65	0.25	0.13	0.25	0.42	0.7	0.39	2	0.44	1.05	1.1	6	0.4	0.1
0.9	0	1.3	0	0.3	1.23	1	0.32	0.41	0.41	0.71	0.37	10	1.46	0	3	1	1.1	1.5	0
4.99	0.32	1.53	0.7	0	0.84	1.4	0.1	0.46	6	4	0.62	0.9	2.16	0.6	1.8	7.96	0.53	0.2	0.19
0.8	0.69	1.3	0.29	0.36	0.94	8	0.4	8	0.5	0.49	0.54	0	1.69	0.23	18.9	0.9	0.18	0.6	0
1.2	0.4	1.27	0.69	0.2	0.6	1.5	0.3	0.499	0.5	0.7	6	0.21	6	0.5	2	0.3	0.1	1.3	4.99
0.48	3	4	0.5	0.41	1.66	0.9	0	0.5	0	0	0.6	0	0.9	0.3	0.1	1	1.15	0.5	0.3
1	0.52	2.15	8	0.3	5	1.6	0.53	0	0	0.43	0.02	0.4	0.2	0.74	1	1.4	1	1	4.99
4.99	1	1.4	1.23	0.78	1.77	0.5	0.5	0	0	0.49	0	0.04	1.73	0.4	1.3	79.4	0.1	0.7	4.99
0.8	3	2.3	0.5	6	0.9	0.9	0.2	0	4.99	0	0.43	0.3	1	0.57	1	0.9	1	0.8	1
0.47	0	2.1	0.8	1.24	1.8	0	0	0.3	0.2	0.7	0.5	0.3	2	0.5	1	1.1	8	0.4	0.1
1.04	0.41	0.1	0.7	0.5	0.9	0.8	0	0.2	0.3	0.02	1	0.45	1.6	1.1	1	1.4	5	0.48	4.99
0.9	0	1.29	0.1	1.5	0.5	1.1	0	0.3	0.3	125.9	0.7	0.3	1.4	0.5	1.5	1.02	0.7	0.41	1.3
1.18	0.3	0	0.36	0.1	0	1	0.5	1	0.28	0.3	1	11.6	1.74	0.4	1	1.2	0.6	0.7	0
0.8	0	0.5	0	0	1	2	0.34	0.25	0.23	0.47	0.5	0.3	1.5	0.45	1.4	1.6	0.9	0.4	0.7
4	0.7	1	0.027	0	0.6	1.2	0	0.4	4.9	0.5	0.3	1	6.5	0.3	1.07	0.8	0.57	0.51	0.2
1.3	0.5	1.8	0	0.02	1	1.2	0.3	6.9	0.2	5.7	0.61	0.28	1.6	0.5	0	1.29	1.3	0.8	0.2
1.2	0.3	1.6	0.08	0	0.9	1.95	0.2	0.22	0.3	0.436	0.4	0.4	4	0.5	1	1.05	1	0.49	0.8
1.2	0.35	1.1	0.7	6	0.7	1.1	0.2	0.1	0	0.3	4.5	0.2	1.76	0.8	1.1	1.32	1.15	0.2	0.3
0.99	0.5	1.24	0.2	0.3	0.7	0.9	1.03	0.1	0.156	1.4	0.36	0	1.6	0.3	1.1	1	0.5	0.5	0
0	0.3	0.13	0.25	0.2	1.94	1.7	0.3	0.29	0.2	0.42	0.4	0.49	1.4	0.3	1.1	1.23	5	1	0.1
4.9	0.32	1.95	0.4	1.55	0.8	1.6	119.9	0.2	0.14	0.4	0.6	0	1.8	2	1.25	1.2	5	0.4	1.5
1	0.4	1.9	1.2	0.3	1.8	1.1	0.07	0.28	0	0.35	0.406	1	1.3	0.43	0.83	1.17	5	0.05	0.3
1	0.67	1.7	0.8	1.4	0.6	10.1	1	1	1	1	0.3	0.2	1.5	0.3	1	1	1.1	1	0.4
42.6	0.8	1.59	0.83	1	0.99	1.56	0	0.2	0	0.21	0.35	0.49	1.6	0.7	4.99	1.25	5	0.32	1
0.8	5.1	1.56	0.7	0.73	0.8	0.7	4.5	0.499	0	0.6	1	0	1.6	0.4	4.99	1.1	0.56	4.99	0.19
1.05	0.47	8.2	5.6	0.3	0.7	1	0.2	0	0	0.5	0.5	0.2	2	4.99	1.35	1.1	0.2	0.53	1
0.9	0	1.5	0.56	0.5	5	1.3	0.1	0.5	0.9	6.7	0.3	0.2	1.7	4.99	1	0.12	0.7	0.1	0
1.41	1	0.6	0	4.4	0.73	1	0.6	20.6	4.99	2	0.3	2	1.4	0	1.3	1	1.4	0.648	0.2
1.5	0.4	1.46	0	0.27	0.43	1.2	1	2	2	4.5	1.5	0.13	1.9	0.4	1.2	1	0.27	0.7	0
1.08	0.35	0.11	0.48	0	0.5	1.25	0.2	0.21	0.24	0.42	4.99	0.9	4.99	2.5	1.13	4.99	1	0.42	0
1.1	0.03	1.29	0.5	3	2.4	1.4	0.2	0.1	0.06	0.6	2	0.2	2	0	1	0.6	1.25	1	0.23
3.8	0.2	0.16	0.57	0.24	1.013	1.2	0.22	0.6	0.5	0.3	0.38	4.9	1.46	0.6	1.27	1.6	0	0.5	0.04
0.97	0.32	1.17	0.39	0.3	0.7	1.4	0	0.3	0.2	0.47	0.49	4.9	2	4.15	1.2	1.27	0.3	0.6	0.22
0.6	0.4	1.4	0	0.2	6.6	1.3	1	4.99	0	4.99	0.4	0	2	4.99	0.9	1.1	0.4	0.1	4.99
1.01	0.6	1.5	0.34	0.3	1.1	1.1	0.5	4.99	4.99	4.9	0.5	0.2	2	0.65	0.95	1.4	0	0.6	3
0.9	0	0.019	1	0	1	0.34	0.31	0	4.99	0	0.4	0.3	4.99	1.2	1	1	0.4	0.65	0.75
1.03	0	1.5	0.65	1	1	2	0.1	0.1	0	0.5	0.3	0.7	4.99	0.45	1.05	1.4	9	0.9	2.3
1.1	0.4	0.1	1.5	0.5	1.05	1.14	0	0.3	0	0.6	4.99	0.49	0	0.5	1	4.99	0.1	0.4	0
0.75	0.4	0.2	0	0.31	0.2	1.12	1	0.5	0.3	0.6	4.99	2.68	0.17	0.7	1.24	1.3	0.45	0.3	0.15
1	0.1	0.135	0	0	1	0.15	0.06	0.5	0.5	0	0	4.9	1.4	0.4	1.18	1	0.4	0.28	0.7
1	2	1.24	1.2	0.2	0.22	17	2	0.499	0.5	1.8	0.42	0.65	1.6	0.5	1.08	0.8	0.39	0.7	1
1.4	0.43	2.3	0.14	0.2	0.39	0	0.2	1.11	0.5	0.83	5	0.13	1.6	3	0.99	0.7	5	0.4	0.3
1	0.23	1.6	2	2	2	4.99	0	0.4	2	4.9	0	0.5	1.2	4	1	1.1	0.1	0.4	0.01
0.7	0.8	0	0.52	0.3	0.73	4.9	0.6	0.24	2.63	0.35	50	0.3	0	0.4	1.12	1.2	0.4	0.22	0.3
2	0.6	1.2	0	0.39	0.54	0	0.3	0	0.2	0.1	0.5	0.7	1.33	1.1	4.99	1.55	0.3	1	1
0.94	0	0	0.8	0.9	1.5	1.06	0	0.5	0	0.5	0	0.3	4.99	4.99	1.6	1.4	0.8	0.7	0.2
0.9	0.3	1.3	0.6	0.4	1.2	13	0.3	0.4	0	0.7	1.26	4	1.72	2	1.17	1	0.42	0.4	0.05
1.2	0	4.9	0	0	0	1.2	4.99	0.8	0.5	0.43	4.99	0.2	1.7	0.1	0.8	1	0.2	0.5	0.3
1.1	4.99	4.99	0.45	0.2	0.8	1.2	4.99	0.35	0.1	1	0.49	1.8	1.48	1	0.7	0.76	3.76	0.2	0.3
0	0.3	0	0	0	0	1.3	0	0.6	0.9	0.7	0.1	0.49	1.4	4.99	0.9	2	0.6	0.49	67.9
0.77	0	1.4	4.99	4.99	4.99	0.8	0.57	0.35	0.13	0.8	0.5	2	2	0.6	4.99	1.1	5
0	0.3	1.3	0	0	4.99	2	0.2	0.7	0.65	0.5	0.2	1	2	0.5		1.1	1
1.2	0.4	1.2	0	0.41	0	0.49	0.1	0.1	0.2	3	0	1	1.6	0		0.66	0.5	0.49
4.99	0.4	1.9	0.5	0.3	0.78	1.5	0.9	3	0.2	4	0.7	4.99	1.6	0.67		1.16	5	0
1.1	0.17	3	15.2	0.24	1	0.77	0.3	4.25	0	0.3	0.6	0.5	4	0		1	5	0.4
0	0.9	3	0.7	1.7	0.8	1	0.5	0	3	0.49	0.4	0.3	1.5	0.4		1.4	0.9	4.99
1.1	3	2.24	0.5	1.1	1.7	1.15	3	0.1	4	2	0.4	0.6	0.9	0.6		0.8	0.82	1
1	2	1.6	0.4	3	1.3	1	0.82	0.499	0	1.1	3	0.3	2	0.45		1.3	0.3	0.6
1	1.27	1.4	1	0.5	0.5	2	0.3	2	0.5	1	4	0	1.6	0.4		0.1	0.33	0.6
1.4	4.99	0.6	2	3	2	1.15	0.3	0.6	2	4.99	0.2	0.2	1	0.2		0.8	0.5	1.22
1.6	0.45	0.8	0.5	1.38	1.53	1.25	0	1	0.9	0.3	20.5	0.28	4.99	0.47		1.12	0.51	0.4
2	0	2.2	3	5	1.05	1.5	0.1	4.99	1	0.6	2	0.4	2	0.4		1.4	0.47	0.1
3	0.3	1.3	2.09	0.28	0.82	1.3	0.1	0	4.99	0.7	0.4	0.3	1.4	0.4		1	1.25	0.5
2.14	0.7	1.6	0.7	0	0.2	1	0.1	0.3	0.5	0.05	1	0.2	4.99	0.3		0	0.2	0.1
1.1	0.75	1.6	0.41	0.5	0.6	3	0.3	0.3	0.2	0.52	4.99	1	1.9	1		1.2	0.5	1
0.84	0.8	2.4	0.2	0.4	1	4.25	3	4.99	0.2	0	0.3	0.2	1.5	0.5		1	0.4	0.4
0.4	0.7	1.3	0.5	1.35	1.6	1	0.2	0.7	0.2	0.3	0.4	0.1	2.07	0.4		1.1	1	0.3
1	0.3	3	1.3	0.25	0.63	0.5	0.3	0.5	0.2	0.63	4.99	0.4	8	0.4		1	0.15	1
1.5	3	1	0.5	0.7	0.8	2	0.4	0.499	0.66	4.99	0.5	9.68	1.4	0.6		1.37	0.31	1
0.86	0.44	1.3	0.55	0.4	1.2	1.4	0.1	0	0	0.5	0.1	0.2	1.43	0.3		1.1	0.4	1
38.4	4.99	0.2	0.65	1.5	1.7	1	3	0.23	0	0.29	0	107.9	2	0.4		40.7	0.5	0.41
1.2	0	2.4	1.4	0.3	3	4.99	4	0.3	0.19	0.06	0.3	0.09	1.2	0.5		4.99	0.4	0
1.2	0.499	1	0.4	3	4.25	0.9	4.99	0.3	0.05	0.5	0.39	0.7	1.45	0.6		1.1	0.5	0.6
1	2	1.03	3	4.2	4.99	1.1	0.1	0.2	0.2	0.66	0.4	0.1	1	0.7		1.3	1.1	0
1	0.8	1.2	0.41	3.3	0.9	1.4	0.5	0.81	2	0.6	0.34	0.3	1.5	0.6		0.9	1	67.8
3	1	1.6	4.99	0.1	0.5	1.7	2	0.2	0	1	0.2	0	1.8	0.5		1.4	0.5	0
0	0.7	2.2	0.2	0.5	2	1.7	0.7	1	0	0.5	0.4	0.2	1.7	0.31		1	1	4.4
0.5	0.3	2.5	0.5	2	1.9	1	1	0.3	0.1	0.4	0.3	0.53	0.1	0.59		1	0.5	0.5
0.5	0.6	2	2	1.2	1	1	4.99	0.3	0.2	0.4	0	0.24	1.1	1		1	3	0.5
2	28	0.8	1.2	1	0.5	1.05	0.6	0.4	0.71	0.5	0.6	1	1.5	0.7		0.79	1	0
1.3	1	1.1	1	0.5	0	1.16	0.1	6.13	0.2	0.67	1	0.5	1.5	0.6		0	0.6	0.44
1	0.6	1.16	0.5	0	0.8	1.7	4	0.3	1	0.5	0.4	0.2	5.51	0		0	0.42	0.5
0.6	0.3	1.3	0	0.3	0.4	2.3	4.99	0.7	0.3	0.6	0.4	0.35	1.8	0.5		0	0.3	0.4
0.7	0.33	1.9	0.3	0.5	1.6	1.4	0.08	0.3	0.1	0.4	0.4	0.3	1.9	0.3		0.6	0.3	1.1
0.9	4.99	1.29	0.6	4.99	1.8	1.3	0.5	0.8	0.15	0.4	9.12	0.49	1.5	0.4		1.4	0.4	0.4
1.2	0.44	1.1	4.99	1	1	0.9	0	0	6.37	0.6	0.5	0.2	1.4	0.6		15.2	0.5	1.3
0.4	0.4	0.11	0.5	1.6	0.4	1.87	0.1	0.1	0.0001	0.8	0.23	4	1.3	0.46		4.99	0.2	2
0.7	0.5	1.6	1	0	0.73	1.3	0.19	0.3	0.47	1	0.4	0.68	2	0.5		4.99	0.4	0.12
0	3	7.7	0	0.1	0.81	1	0.3	0.3	0.2	0.5	0	0.2	1.1	0.49		0.7	5	0
0.9	1.3	1.2	0.27	0.26	1	1.3	0.02	0.61	0.9	0.3	0.2	0.2	1.4	0		4.99	0.4	0.3
0.9	4.4	2.34	4.99	0.39	0.2	1.3	0.4	0.2	0.1	0.67	0.25	0	1.7	0.5		1.2	0.5	1
1.2	0.3	1.2	0.7	0.4	0.7	1.38	0.1	1.1	0	0.67	0.6	0.16	1.46	0.77		0	0.6	0.283
0.5	1.2	1.8	0.28	0	0.9	1	0	0.68	0.2	1	0.2	0.38	1.7	1		1.4	0.47	4.99
1	0.4	1.2	0.7	0	0.7	1.5	0.2	0.51	0.3	0.6	0.2	0.3	1.8	0.5		0.11	0.39	0.6
0	0.45	1.2	0	0.3	1.83	0.7	0.2	1	0.58	0.6	0.4	0.2	2	0.5		1	0	0.48
46.1	0.4	1.5	0.5	0.3	0.9	1.2	0.97	0.3	0.1	0.5	0.1	0.8	2.1	1.1		4.99	0.4	1
0.9	0.3	1.3	2.5	1.01	0.6	1.5	0.1	0.15	0.5	0.7	0.29	1	1.1	0.619		1.6	0.4	0
1	0.4	4.9	0.4	0.2	0.7	1.2	0.3	0.3	0.75	0.49	0.49	0.27	1.5	0.87		0.77	0.3	1.9
4.1	1	2.6	0.92	0.3	1	1.68	0.2	0.499	0.35	0.3	0.3	0.57	1.4	0.214		1.3	0.42	4.99
0.7	5	0.9	0.4	0.2	1.81	1.2	1	0.2	1	1	0.5	0.021	1.9	0		1.12	5	0.2
1.29	0.71	2.4	0.7	0	0.7	2.1	0.61	0.35	0.4	0.54	0.5	0	1.66	0.5		1	0.41	1.7
0.8	0.3	1.3	0.3	1.3	1.8	1.61	0.3	0.4	0.2	0.5	0.4	0.3	1.6	0.8		1.8	0.4	1
1.1	0.9	2.1	0.4	0.25	0.6	1.22	0.7	1	0.2	0.4	0.5	0.3	1.6	1.3		1.3	0.4	0.3
1	0.4	2.3	0.6	1.1	0.8	0	0	0.2	0.2	0.47	0.5	0.8	1.75	0.22		8	0.4	1.1
0.8	0.4	1.57	0	0.2	1	1.5	0.3	0	0.5	0	0.4	0.05	1	0.61		0.7	2	0.4
1.1	2	1.4	1.07	0.2	1.1	1.5	0.4	0.31	0.1	0.5	0.3	0.36	1.59	0.7		4.99	0.5	0.7
1	0.78	2.4	0.3	0.4	1.62	1.2	0.4	0.7	0	0.59	0.34	0.24	1.85	0.4		4.99	8.15	0.9
4.9	0.55	2.4	0.8	1	0.8	0.9	0.77	0.33	0	1	0.3	0	1.6	0.52		1.3	0.3	10
0	0.6	2.27	0.3	1.29	1.6	0	0.1	0.7	0.23	0.83	0.5	0.5	1.4	0.5		4.99	0.4
0.84	1.3	0	15	0.3	1.71	1.2	1	0.3	0.2	0.6	0.39	0.1	1.6	0.1		1.3	0.6	0
1.7	1	0	1.3	1.7	0.78	1.3	0.95	0.3	0.17	0.5	0	0.19	1.8	0.65		1	0	0.4
1	0.68	0	0.51	1.55	0.6	1.18	0.15	0.6	0	1.2	0.2	0.2	1.6	0.2		1.2	0.39	0.42
1.1	0	1.5	0.3	0.26	1	1.4	0	1	0.1	0.44	0.59	0.3	1.2	0.05		0.7	0.3	3
1.04	0.8	1.5	0.9	0	0.9	1.36	1	0.27	0.35	0.25	0.39	0	1.46	0		1.1	0.6	0.95
1.13	1	1.4	1.1	1	0.8	1.57	0.3	3	1	0.237	0.45	0.05	1.48	0.4		0.7	0.95	0.5
1	0.5	1.6	0.95	0.4	1.1	1	0.1	0.3	1	0	0.5	0.2	1.364	1		1.5	0.2	1.2
1.1	0.5	1.3	0	0.2	0.5	1.16	0.3	4.99	0.06	0	0.4	1	0	0.4		0	0.3	1
0.7	0.5	1.3	0	0.5	0.6	1.45	0.5	0	0.77	0.5	0.31	0.7	1.6	0.4		1.02	0.4	0.5
1.31	0.499	1.4	0	0.5	1	1.49	0.1	0.3	0.3	0.6	0.84	0.15	1.6	0.41		0.58	2	0.01
0	0.3	1.33	1	0.3	0.8	1.1	0.2	0	0.2	157.7	0.181	0.3	2.3	0.5		0.9	2	0.6
0	0.6	1.4	0.5	0.4	1	1.3	0.16	0.09	0.3	0.45	0	0.15	1.4	3		1.2	0.4	0.4
0	0.47	1.45	0.4	0.28	1.01	2.1	1	0.4	1	0.4	0.5	0.2	1.7	4.99		0.7	0	0.5
0.75	0.44	1.17	0.7	1	1.01	1.06	0.2	0.3	0.01	0.57	0.5	4.99	1.7	0.48		1.7	0.3	0.5
0.8	0	1	0.5	0.29	1	1.75	0.17	4.99	0.16	0	0.2	4.99	1.42	0.36		1.1	0	0.4
1.2	0	0	0.5	0.32	0.73	4.99	0	0.2	0.001	0.4	0.51	0.04	0	0.2		0.1	5	0.7
0.8	1.3	2.3	16.3	0	0	0	0.04	0.24	0	0.4	0.41	0.49	12.7	0.1		1.4	1	0.3
38.5	0.54	1.58	0.42	0.11	1.6	0.8	0.25	0.2	0.5	0.57	0.5	1.4	1.4	0.62		1.3	0.4	0.23
1	1	1.67	0.39	0	1.06	0.95	1	1.1	0.3	0.5	4.99	0.271	1.51	0.8		0.9	0.1	0.44
0.84	0.39	1.41	0.47	0.6	0.93	1.47	0.16	0	0	2.5	0.38	0.3	1.5	0.39		0.9	0.5	0
1.1	0.96	1.32	0.64	0.44	1.89	1.1	0.5	1.2	0.01	0.6	0.5	0.3	2	0.5		0.9	0.4	0.4
0.87	0.35	1.4	0	1.1	0.8	1.26	0.56	0.2	0.2	0.3	0.5	0.49	1.4	0.39		1.4	0.3	0.4
1	0.6	2.22	0	0.4	0.9	0	0.3	0	0.2	0.05	0.5	4.99	0.13	0.8		1.05	0.3	0.4
0	0.8	1.25	0.95	0.38	1.7	1.1	0.2	1.1	0.23	0	0.6	4.99	91.3	0.6		1	0.34	0.4
0.7	0.36	1.6	0.65	1.7	0	1.4	0.6	0.3	4.99	0.65	0.4	0.14	2.1	1		0.73	0.6	0.4
1.05	0.133	1.2	1	0.33	1.31	1.29	0	1	4.99	1	0.05	1	1.5	0.6		0.3	5	0.96
1.2	0	1.29	0.6	0.6	0.567	1.3	0.3	0.2	0	0.8	0	4.99	1.5	0.39		1	0.4	1.2
0.8	1	2.3	0.4	0.099	0	2.5	4.99	0.29	0.3	0.5	0.05	0.2	1.5	0.4		1.1	0	0.4
1	0	1.23	0.5	0	0.2	1	0	0.25	0	0.55	1	0.2	1.6	1		0.9	0.4	4.99
1.7	0.35	1.13	0.78	0	0.6	1.3	0	0.11	0.2	0.5	0.1	0.1	1.49	4.99		1.1	0	4.99
0.9	1	1.2	0.45	0.2	0.92	1.12	0.1	1	0	0	0.4	0.21	6	0.62		1	0.5	0.3
0.527	0.1	1	0.4	0.39	0.9	0	0.41	6	0.07	0.5	0.59	4.99	4.99	1.7		1.4	0.4	0.71
0	0.16	1.2	1.3	0.38	1	1.6	0.1	4.99	0.11	4	0.4	1	4.99	0.4		1.18	0.4	0.4
0.7	0.2	2	0.66	0	4.99	0.9	0.21	4.99	1	4.99	0.27	0.35	1.92	0.5		1.5	0.4	0.5
1.7	8	0.8	0.71	0.5	1.3	1	4.99	0.22	0.6	4.99	0.7	1	1.5	0.8		1	5	0.4
0.7	0.6	1.03	0.209	0.3	0.9	0.3	0.3	0.09	1	0.21	0.42	4	1.2	0.45		4.99	0.4	0.48
0.56	0.54	1.7	0	0.37	0.75	1.34	0.1	0.5	0.1	0.5	0.74	4.9	1.4	0.3		4.99	0	0.5
1.1	4.99	8	1	0.5	0.7	0.6	0.21	0	0.2	1.1	0.17	0.7	2.048	0.3		0.77	0.6	0.3
8	0.4	1.04	4.99	0	0.6	1.1	0	0.09	0.2	0.21	0.5	0	2	0.4		1	0.3	0.45
0.9	0.2	1.46	0.3	0.5	1.1	1	0	0.288	0.11	0.685	0.6	0.2	1.53	0.6		1	0.4	0.4
0	0.5	0	0.6	0.26	0.74	4.99	0.6	0.3	0.26	4.99	0.15	0.2	1	0.5		1.14	0.38	1
0.9	0.6	1.6	0.1	0	0	0.8	0.12	0.23	5	0.67	0.571	0.5	4.99	0.4		1	0.31	0.38
0.78	0.3	1.08	0.2	1.2	1.8	0.9	0	0.499	1	4.99	4.99	0.3	4.99	1		1.2	5	0.52
1.2	0.5	1.6	0.7	0.5	0.65	1.5	0.6	4.99	0.3	0.47	0.4	0.9	1.9	0.44		0.9	0.3	2
1	0.22	1.3	8	1	1	0.84	0.5	4.99	0.2	0.9	0.5	0.1	1.55	1		0.7	0.6	0.38
0.79	1	2.54	0.1	1.5	1.4	1.6	1	0.3	0.03	4.9	4.99	0.1	1.8	0.49		0.48	0.31	0.1
0.9	0.7	1.7	0.5	0.37	0.95	4.99	0.5	0.28	0.5	0.6	4.99	0.1	4.99	1		1	0.4	0.4
0.8	0.5	1.3	5	0.3	0.7	1.26	0.22	0.8	0	0.4	0.41	1	1.8	0.43		0	0.6	0.37
0.7	1	1.21	0.4	0.22	0.75	0.8	0.2	1.2	0.03	0.47	0.7	0.3	1.4	0.41		0.91	0.4	1
0.78	0.6	1	0.4	1	1	1.29	0	0.3	0.374	0.7	4.99	0.2	1.5	0.2		0.99	0.1	0.32
1.2	0.6	2.6	0.5	4.99	0.7	0.95	1	0.3	0.1	0.6	4.99	0.2	1.68	0.15		0.7	0.4	4.99
0.9	0.35	1	0	4.99	1	4.99	0.4	0.4	0.18	0.9	0.6	0.1	0.96	1		0.9	0.4	0.9
1	0.31	1.3	0.5	0.05	0.45	0.9	112	0.499	0.5	1	0.6	1	2	4.99		0.96	0	0.3
1.3	0.3	2	0.34	0.01	0.05	1.6	0.04	1.1	4.99	4.9	0.5	0.32	1.3	0.3		1	0	0.36
1.2	1	2.1	0	0	0.5	1.7	0.5	0.6	1	134.96	0.44	2.1	1.5	1.2		1.19	1
0.7	4.99	1.8	1.4	0.11	0.5	1.17	0.05	0.6	0.25	0.3	0.13	0	1.3	0.5		0.98	0.4
0	0.7	1	0.5	0.43	1.043	1	0.3	0.4	0.4	0.6	4.99	0.2	2	0.42		1.6	0.4
0.88	4.99	1.4	1	0.4	1	4.99	0.3	4.99	1	0.4	1.4	0.15	4.99	0.4		0.6	0.33
1	0.15	1.5	1	0.47	0.99	1.6	0.34	0.39	4.99	0.4	0.36	0.2	1.68	0.3		0.9	0.3
4.99	0.45	4.9	0.7	1	0.7	3.1	0.5	0	0.3	0.9	0	0	1.3	0.6		0.74	1
1	0	1.8	0.3	2	2	1.1	4.99	0.2	0.1	0.4	4	0.31	1.4	0.2		1.01	0.1
3	1	1.4	0.35	1	1	1.4	1	1	0.5	0.8	4.99	0.36	1.6	2.1			0.4
4.99	0.12	4.9	1	0.4	0.8	1.3	0.5	0.9	0.04	0.9	4.99	0.49	1.6	1			0.3
4.99	4.99	5	0.3	0.12	0.9	1	1.2	0.1	1.1	0.6	1.6	0.21	1.9	0.6			3.68
0.5	0.5	0.93	1	1	1.2	0.7	0.3	0	0.4	0.7	0.3	1	1.63	0.2			4.2
1.1	0.62	0.8	0.4	1	1	1.1	0.4	0	0.1	0.3	0.5	107	1.1	0.42			0
1	1	0.86	4.99	0.2	0.9	1.1	3	0.2	0.3	0.4	1.3	0	1.1				0.4
0.75	2	1.66	0.6	0.3	0.7	1.6	0.05	0.3	4	1	0.49	0.7	1.4				0.3
0.61	0.4	1.6	4.99	10	0.35	1	1.1	0.5	4.99	1	0.9	103.1	1.8				0.34
0.827	0.2	1.8	0.14	0.8	1.1	6	0.8	0.1	0.32	0.6	0.6	0	2.3				0.3
0.9	0.5	1.3	0.7	1.3	0.7	1	0.09	1	0	0.4	0.4	0.1	1.5				5.2
1.1	0.2	1.4	0	1.53	1.1	0.9	0.6	0	0.5	0.49	0.1	0.01	1.3				0.4
0.9	0.7	1.2	0.25	0	1.8		124	0.499	0	1	0.04	0.8	2				0.11
1	4.99	4.9	16.162	0.5	1.7		0.68	0	0.2	0.4	0.5		1.58				0.06
1	1	1.3	0.6	0.5	1		4	0.4	0	0.48	0.5		17				0.02
1.2	1	2.3	0.4	0.3	4.99		4.99	0.4	0.12	0.51	0.4		1.1				0
0.97	0.45	4.9	2	0.3	1.1		0.1	0.17	0.9	0.5	1		1.3				0.06
0.7	0.9	2.35	2	0.5	0.9		0.3	0	0	0.52	180		1.9				0.05
1.2	4.99	4	0.42	0.4	0.3		2	0.2	0	1	1		1.9				0.01
0.8	0.83	4.9	0.7	0.35	0.3		0	0.16	0.1	127	0.5		0				0.5
1	0	1.4	0.6	0	0.7		0.2	0.19	0.3	1.1	0.6		1.25				1
1	0	0.3	0.4	0	1.1		0.3	1	0.4	0.5	0.4		2				0.2
1.1	0.7	1.4	0.4	0	0.7		0.36	1	0.2	0.5	0.32		1.44				0
1.5	0.1	1.3	0.1	0.5	0.9		0.9	0	0	0.3	1		1.59
4.99	0.2	1.6	1	0.2	0.3		0		1		0.4		1.33
1.05	0	1.41	0.5		0.3		0		0.7		0.44		1.37
4.99	0.3	1.6	1		1.7		0.3		1		0.4		1.3
1.2	0.5	0.5	1.6		1.3		0.6		0.6		0.5		15.9
0.5	0.43	0.5	0.48		0.7		0		0		0.01		1.4
1		0.8	1		4.99		0.1		0.3		1		1.8
1.1			4.99		0.4		1		0.3		0.5		1.6
			1.32		1.6		1		0		0.8		1
			4				0.5		0.08		0.5		1.3
			4.99				0.1		0		0.5		1.19
			0.7				0.3		0.1		0.1		1.64
			0.5				0.2		0.18		0.5		1.3
			0.1				0.1		0.23		0.34		1.5
			0.4				1		0		0.64		1.39
			1						1				1.7
			0.6						1				0.9
			0.55						0				1.5
			0						0.5
			0

## Sheet: CRP_nephelo_high
CRP-EQA - nephelometric methods, positive samples
Additional Information
This table contains the raw results of the EQA participants without any correction. Results from obvious swap of samples are highlighted in green. Results that were excluded because they exceede the calibration by > 20% in at least one sample are highlighted in orange
January 2013	May 2013	August 2013	November 2013	January 2014	May 2014	August 2014	October 2014	January 2015	April 2015	August 2015	October 2015	January 2016	May 2016	September 2016	October 2016	January 2017	May 2017	September 2017	November 2017
36.5	67.7	27	17.2	50.6	108	127	140	21.7	96.7	132	105	99.3	95.2	47.1	17.7	86.2	80.6	68.1	71.7
41.1	69.3	25.1	16.6	48.3	95.1	132	135	24.9	91	112.6	108	112.8	89.4	58.6	1.6	85.9	78.7	63.2	58.9
36.9	65.7	24.8	16.1	58.4	101.2	137	130.9	23.43	90.3	121	112	102.5	91.1	56.9	19.4	88.4	76.3	62	70.9
40.9	75.5	29.2	16.1	53.6	103.6	95.5	118.3	23.7	93.63	133	114	98.5	87.4	54.2	18.1	88.5	76	62.2	73
41	72.1	26.1	14.6	53.3	98	127	126	20.04	89.1	135	107	101.1	78	73.3	20.7	59	74.3	61.5	78.9
39.5	65.2	27.6	15.8	66.8	100	120.5	132	24	95.8	136	110	105	88	61.4	19.9	84.3	74	62	80.38
36.9	68.3	28.9	16.3	55.8	99.1	133.5	123	23	86.2	132	108	100.1	87.8	55	18	87	73	65.9	74.3
45.1	66.1	29.4	17.1	52.5	93	131.3	126.7	22.1	91.2	130	104	108	84.5	58.3	17.5	89.5	71.4	69.3	46
41.5	76.5	26	15.7	6.07	97.6	126	120	22.9	85.2	131	92.3	126.17	85.4	73	19.3	79.4	71.2	65.7	78.5
35	67.4	23.9	16	5.41	89.9	84	67.9	22.3	94	105.6	115	113	96.05	68	15.5	84	69.1	65.5	77
32.3	66.8	28.4	13.3	66.8	10.1	134	143	24.4	95.14	128	115.71	90	91	52.5	19.5	75.3	68.6	67	79
42.45	63.8	25.1	15	57.5	9.8	130	131.7	22.6	85.7	115	105	103	87.9	611	19.7	91.5	67.8	75	71.1
39	66.9	26.6	17.6	51.9	98.7	127.5	123	24.2	90.5	94	110	110	83	54	16.6	91.3	67.1	75.7	77.8
37.8	65	27.8	16.5	52	98.3	103	132	23.4	95	142.3	120	108	94.7	64.4	20	96.4	64.7	74.4	75.3
37.4	67	30	16.4	51	96.1	142	128	23.5	100	134	71	108	87.2	56.7	19.1	89	64.3	78.8	66.7
36.7	67.1	27.4	15.8	54	99	98	134	20.4	99.5	129	102.8	106	84.3	71	20.3		63	76	64.9
41.5	67	26.1	16.5	53	100	137	105	22.9	93.6	107	114	87.3	89	63.3	19.5		62.4	65.8
41.9	71	24.3	25	58.6	87	123	139	22.9	89.9	140	107		89.5	49.7	20.8		62	7.78
37.9	77	27.2	16.06	51.6	98.4	121	130	23.1	95.8		114		84.9	45	19.2		36
39.4	66.7	29.3	15.8	50.9	93.2	126	135	23.3	90		113		82.25	49.2	19.7
40.5	74.3	26.9	16.2	52.7	91.7	133	129		93.7		104				18.9
38.2	64.5	24.5	15.4	62.1	95.9	141	134
37.95	65	26.6	16	52.8	96.4	132	133
	78.7	27.8	14.75	60.1	103.5		129.5
	66		16.5		90
	71.6		16.35		103
	76.3		14
	79.7

## Sheet: CRP_nephelo_low
CRP-EQA - nephelometric methods, negative samples
Additional Information
This table contains the raw results of the EQA participants without any correction. Results from obvious swap of samples are highlighted in green. Results that were excluded because they exceede the calibration by > 20% in at least one sample are highlighted in orange
January 2013	May 2013	August 2013	November 2013	January 2014	May 2014	August 2014	October 2014	January 2015	April 2015	August 2015	October 2015	January 2016	May 2016	September 2016	October 2016	January 2017	May 2017	September 2017	November 2017
0	3.2	1.4	3.5	0.3	3.2	1.3	3.2	0.2	0	0.4	3.27	3	0	0.5	0	1.5	3.02	0.6	0.9
1.3	0.41	0	0.4	0	0.8	0	0	0.3	0.2	0.55	0.4	1.1	1.6	0.6	20.5	3.17	1.55	3.02	3.11
1	3.19	2.85	1.25	1.7	1.8	1.3	0.6	3.28	0.3	3.28	0.2	3.17	1.8	3.17	3.17	3.11	0	3	3
1.56	1.7	1.8	1.2	3.17	3.17	3.45	3.45	0	3.28	3	3.28	1.14	3.38	3.4	3	0	0	3.03	1
1.3	0.75	2.9	2.9	0.3	3	0	0.2	1	3	1.32	3.2	0.9	3	2.15	1.8	3.6	1.44	0	1.36
2.9	2.9	3.45	3.17	1.1	1.85	3.07	1.33	0.5	1	1	1.57	0.8	1.5	0.8	4.99	4.99	0	3.5	1.37
3.34	3.34	2.29	0.48	1.7	2	1.1	0.5	0.6	1	1	0.5	4.99	1.6	0.5	0	1.4	1.46	3.03	0
1.47	0.39	2.2	1.27	3.17	1.7	1.6	4	3.45	0.3	0	1	1.2	4.99	3.38	3.5	3.11	1.3	1	3.5
1.4	1.46	3.19	1.1	0.11	4.99	3.45	3.45	1.5	4.99	2.5	4.99	1.18	2.6	1.2	4.99	0.5	1	3.03	0
3.4	0.8	0	3.45	0.12	0	2.7	0	1.06	0	1.81	1.6	0	3.13	1.49	1.5	1.3	2.9	0.5	1
0	3.19	2.6	0	0	0.21	1.5	1.4	0	1.14	0	1.45	3.4	0	0	3.38	1.83	3.02	1.2	0
2.18	0	0	0	1.3	0.18	0	0.4	4.99	0	0	0	0	1	0	1.3	0	0	1.7	3.03
2.9	0	4.9	0.7	0	1.6	1.145	0	0	3	3.6	4.99	0	3.4	3.5	2.34	0	0.43	1.57	1.1
0	0	1	0	0.267	0	4.99	0.172	3.6	0	0	1	0	0	0	1.7	0	4.99	0	2.1
0.905	0.407	3.4	0.459	4.99	0.822	0	4.99	0	3.6	0	3.4	6	0	3.17	1.8	2.6	0.4	1.47	1.1
4.99	4.99	0	4.99	0	4.99	3.6	0	0	0	3.27	0	1	3.17	2.1	2.2		3.11	0	3.03
0	1	0	1	3.4	0	0	3.4	3.44	0	0	0	3.17	1.7	0.3	1		0	0
0	3.6	3.45	3.4	0	3.4	0	0	3.44	3.19	1.74	3		2.61	1.22	0		3.6	1.99
0	0	3.34	0	0	0	0	0	1.5	0		1.7		3.17	2.9	0		0.6
3.34	0	2.51	0	3.17	0	3.45	3.44	1	0.16		1.29		1.29	3.38	2.35
1.74	0	3.3	4.99	3.36	1.29	3.44	3.44		1		0				2.13
3.19	3.34	3.45	3.17	1.3	3.17	2.3	0
3.3	3.34	2.34	3.45	3.17	3.45	2.05	1.28
	0	2.95	0	1.37	2.3		0
	3.19		3.3		0.76
	0.36		0.45		1.93
	1.26		1.05
	2.25

## Sheet: CRP_immunol_high
CRP-EQA - immunologic methods, positive samples
Additional Information
This table contains the raw results of the EQA participants without any correction. Results from obvious swap of samples are highlighted in green. Results that were excluded because they exceede the calibration by > 20% in at least one sample are highlighted in orange
January 2013	May 2013	August 2013	November 2013	January 2014	May 2014	August 2014	October 2014	January 2015	April 2015	August 2015	October 2015	January 2016	May 2016	September 2016	October 2016	January 2017	May 2017	September 2017	November 2017
36	58	25	15	49	92	129	0	22	82	120	120	120	104	52	18	99	152	71	76
43	114	33	19	50	100	123	123	28	112	136	101	105	72	18	23.2	124	140	87.5	83.4
45	115	28	17	49.9	40	178	152.5	30.7	134.3	157	118	100.8	84.5	71.6	21.1	85	109	67.5	0.55
41.6	62	25	14	530	114	114	106	23.3	89.3	198	133.4	118.5	82.3	60.4	19.8	82.9	87	60.1	67.8
34.3	80	31	15	51	91	102	114	25	100.8	137	106	92	92.95	49.8	17	91.5	86.4	72.9	65
32	69	44	40	62.6	95.5	135	123.4	21	90	140.2	122.4	106	80	64.25	24	74	78	60	65.9
49	60.2	0	15	50	100	128.6	137.5	21	80	134	10	114.9	87	55	17.5	90	75.8	71	80
35	72	27.6	13.9	49	99	107	139	21.5	79	139	107	121	83.2	63	23	80.1	74	56.6	28
	57.3	23.6		115	85	112	120	48.8	98	202	105	102	93	43.3	18.9	81	74	70	83
	70	17		62	113	120	166	25	76	130.47	109	117	80	62	22	79.5	72.9	63.3	79
	138	28		150	200	120	200	29	85	137	102	89	114.6	55.3	20	94	72	75	45
	5	29		108	120	152	200	21	86.12	128.8	110	108	77.5	60	11	4.99	72	64.7	68.65
		27			100	51	120	29	86.5	110	133	107.7	94	40	19.8	50	71	58.1	66.9
		29			117	120		43	104	140	105	140	90	54	16.3	77.7	69	69.7	84.4
						120		22	82	135	179	107	94	51.12	16.8	78.8	68.7	65	75
								32	81.8	70	200	110	81.57	52.1	16.9	97.6	67.1	92.2	200
									80		117	76	82.2	66.8	27	79	66	72	73
									152		200	118	103.9	52	112	110	64	67	66
									162		120	120	95	62.2	22	90	63	67	101
									54		140	111	176	60	24	84	62.5	69	81
									103		115	105	113	99	20	105	62	71	76
											108	107	107	68	19	95	60.1	63.5	66.9
												200	116	27	17.9	91	60	61	65.67
												120	96	64	17.2	92	59.9	89	111
												20	96	54.4	18	99	59.2	47	68
													98	54	21	77	59	63	69
													88	53	21	80.5	58.4		76
													80.2	53		77.2	57.7
													80.7	47		138	23
													83.1	42		65
													74	60		88
													90			98

## Sheet: CRP_immunol_low
CRP-EQA - immunologic methods, negative samples
Additional Information
This table contains the raw results of the EQA participants without any correction. Results from obvious swap of samples are highlighted in green. Results that were excluded because they exceede the calibration by > 20% in at least one sample are highlighted in orange
January 2013	May 2013	August 2013	November 2013	January 2014	May 2014	August 2014	October 2014	January 2015	April 2015	August 2015	October 2015	January 2016	May 2016	September 2016	October 2016	January 2017	May 2017	September 2017	November 2017
1	0	1	0	0	1	1	124	0	0	4.99	4.99	4.99	4.99	5	1	0	8	0	4.99
5	5	5	0	0.3	1	1.2	0.4	4.99	0	1	1	0	2	1	1.09	1.33	10	0.5	0.2
5	5	0	0	0.2	0	3	3	0.203	0.2	4.99	4.99	0.3	1.76	0.416	1.65	1.3	8	1.01	71
1.9	0.6	1.4	0.5	4.8	0	3	4.99	0.3	0.3	0.405	0.268	0.15	1.7	0.79	1.3	1.3	5	0.6	0.2
0.95	4.99	4.9	1	0.3	0.6	1.14	0.6	0.4	0.2	0.6	0.5	1	2	0.5	1	1.3	0.436	0.8	1
0.5	1	0	3	0	0.7	1.1	0.2	0.499	0.2	0.5	0.7	4.9	2	0.7	4.99	1	5	1	0.3
7	0	28.9	0.33	4.99	0.6	1	0	4.99	10	0.5	0.1	0.5	4.99	1	1	4.99	0.2	5	4.99
4.99	0.3	1.3	0.4	0.5	4.99	5	4.99	0.2	0	0	0	5	1.5	4.99	0	0.9	5	0.4	0.2
	0.3	1.1		8	4.99	0.5	4.99	0	3	3	0.5	0.2	4.99	0.4	0.5	0	5	5	4.99
	4.99	0.5		4.99	4.99	4.99	3	4.99	0.5	0.48	4.99	4.99	10	0	4.99	1	0.65	0.4	0.5
	0	4.9		15	0	0.5	0	0.499	5	0.4	0.43	4.99	5.5	0.4	0.5	4.99	0	5	4.99
	64	4.9		0	47	0	13	4.99	0.02	0.2	0.4	0.2	1.5	4.99	4.99	86	5	0.4	0.24
		4.9			4.99	148	4.99	4.99	0.2	4.99	0.6	0.2	4.99	0.5	1.16	4.99	5	0.4	0.2
		4.9			4.99	4.99		120	0	4.99	4.99	0	0.5	4.99	1.05	0.92	5	0.4	0.1
						4.99		4.99	4.99	4.99	0	0.49	4.99	0.33	1	1	0.5	5	4.99
								5	3	14	8	4.99	0.87	0.5	1.41	0.9	0.43	0.512	11
									4.99		4.99	4.99	1.5	0.3	0	4.99	5	5	4.99
									0		8	4.99	1.6	4.99	9	0.987	5	5	4.99
									8		4.99	4.99	4.99	0.398	4.99	1	0.5	5	4.99
									4.99		4.99	20	0	4.99	4.99	4.99	0.25	5	4.99
									5		0.3	0.3	4.99	4.99	4.99	4.99	5	5	4.99
											0.4	0.3	4.99	4.99	0.4	4.99	0.4	0.41	0.2
												8	4.99	4.99	0.5	4.99	1	0.43	0.1
												4.99	4.99	4.99	1	4.99	0.3	8	8
												0	4.99	0.4	4.99	4.99	0.1	5	4.99
													4.99	0.4	4.99	1	5	5	4.99
													4.99	0.3	4.99	0.96	0.4		4.99
													1.6	4.99		0.14	0.32
													1.5	5		8	5
													1.6	4.99		4.99
													4.99	4.99		4.99
													5			4.99

## Sheet: CRP_dry_chem_hi
CRP-EQA - dry-chemistry methods, positive samples
Additional Information
This table contains the raw results of the EQA participants without any correction. Results from obvious swap of samples are highlighted in green. Results that were excluded because they exceede the calibration by > 20% in at least one sample are highlighted in orange
January 2013	May 2013	August 2013	November 2013	January 2014	May 2014	August 2014	October 2014	January 2015	April 2015	August 2015	October 2015	January 2016	May 2016	September 2016	October 2016	January 2017	May 2017	September 2017	November 2017
40	68	26	16	58	106	120	120	24	102	110	0	117	86	61	18	85	77	68	82
44	70	24	19	60	63	120	120	25	5	120	120	120	96	68	22	77	119	69	84
45.8	77.3	30.84	19.99	57.98	102	178	178.25	28.91	135	135.3	138	126	145	101	21	108	133	108	82
45	68	24	21	60	165	150	154	33	114	142	156.8	170	122	55	20	100	88	84	74
42	77.5	32.4	22	54	109.2	200	180	43	120	133	150	110	3.9	56	22	93	83	63.5	92
43.7	147	32	27	73.3	148	179.5	90	30.8	117.1	180.6	113	111	89	56	19	98	81	70	86
40.6	73.2	32	21.3	59.6	124	182	167	35.15	70.7	150	116	120	90	56	21.9	47.2	81	74	70
40	69	31	20	67.3	100	180.6	168	32.7	83	162	127	113	98	59	21	95	81	200	200
46	75	32.25	18.8	59.9	116	172	150	21	107	149	145	100	100	61	5	85	79	72	66
43.7	72.5	28.2	0.21	61	108	149	124	33	89	172	109.6	118	102	56	17	88	79	69	76
44.8	72.3	29.3	20.6	64	115	145	126	28	100	150	105	114	89	66	21	107	78	78	82
40	77	27	19.2	60.8	120	127	144	24	138	120	138	108	100	52	24	96	76.1	71	78
41	72	22	17	58	87	150	147	25	110	120	113	114	90	43	22	107	75	64	60
33	63	27	11	61	150	157	120	23	84	143	120	108	110	61	23	95	73	63	65
42	70	1	16	52	108.5	200	187	36	117	140	114	138.4	85	62	19	88	73	67.6	80
36	68	35.5	15	55	96	180	139	20.1	89	120	112	120	93	2.8	22	113	72.7	72	87
45	68	30	2.2	50.8	104	115	129	27	118	116	110	80	85	57	17	98	72	67	75
46.6	73	31	17	56	108	120	0	30	120	124	117	101.4	92	56	7	100	71	64	84
44	74.5	27.4	18	58	77	120	135	25	91	100	119	119	90	58	19	101	70	94	64
45	73	27	17	45	99	128	133	25	97	168.5	117	116	94	62	24.8	97	68	66
44	70	28	16	57	250	120	138	25	93	120	120	106	97	66.3	7	93	66	64
38	66	29	27	53	107	129	120	28	102	120	120	120	74	87	35	141	66	80
36	77	32	18	62	105	137	120	20	103	120	103	119	87	76	120	76	59	73
40	69	28	16	250	107	148.1	125	24	112	120	120		110.5			94	57
42	62	33.7	14	46	104	120	146	34.6	109	185	120.7		104			98
36	63	30	16	61	110	120	120	27	133	120			120			112
40	69	30.7	0	56	92	192	120	26	110				87
46.1	67	33	24	55	110	120	150	25					84
37.8	70		19	60.9	114	159.1	120	25
36	71.3		23.3	61	119		169	28
43.1	77		16	62	141		120	31.9
39	59		15	5	108		135.2	22
38	72		17	59	141.4
46.4	66		18	60.1
43.7	78.4		13	59.6
			14
			14
			16
			14

## Sheet: CRP_dry_chem_low
CRP-EQA - dry-chemistry methods, negative samples
Additional Information
This table contains the raw results of the EQA participants without any correction. Results from obvious swap of samples are highlighted in green. Results that were excluded because they exceede the calibration by > 20% in at least one sample are highlighted in orange
January 2013	May 2013	August 2013	November 2013	January 2014	May 2014	August 2014	October 2014	January 2015	April 2015	August 2015	October 2015	January 2016	May 2016	September 2016	October 2016	January 2017	May 2017	September 2017	November 2017
4.99	0	4.9	0	4.99	0	4.99	4.99	4.99	4.99	4.99	0	4.99	4.99	4.99	4.99	4.99	4.99	4.99	4.99
4.99	4.99	4.9	4.99	4.99	4.99	4.99	4.99	4.99	120	4.99	4.99	4.99	4.99	4.99	4.99	4.99	8	4.99	4.99
1.63	3.85	3.78	3.35	0.5	3	3.04	0.5	3.11	2.31	0.5	1	3.8	4.99	0	0	0	0	0	0
3	3	4	2	1	3.4	4	0	1	0	2	2.1	5.9	3.6	0	1	0	4.99	0	0
4.99	50	4.9	4.99	0	6.2	8	3.5	6	4	4	6.65	0	52.7	1	0	1	4.99	0	4.99
4.99	0	2.1	0.8	2.7	4.99	4	3.3	2.9	4.99	4.5	0	1	0	0	4.99	0	4.99	4.99	4.99
0	3.2	4	0.9	1.6	2.9	5.6	4.99	5.2	3.7	0	1	4.99	2	4.99	4.99	4.99	4.99	4.99	4.99
0	0	6	2	4.99	4.99	5.6	4.4	4.99	4.99	3	0	4.99	0	4.99	4.99	4.99	4.99	37	16
3	1	3	0	2.1	4.99	6	4.99	3.3	3	4.99	4.99	4.99	4.99	4.99	22	4.99	4.99	4.99	4.99
0	4.9	6	0.03	4.99	0	4.99	5	7	0	4	0.55	4.99	4.99	4.99	4.99	4.99	4.99	4.99	4.99
4.99	4.99	2.5	0	4.99	4.99	4.99	0	4	4.99	4.99	4.99	4.99	4.99	4.99	4.99	4.99	4.99	4.99	4.99
0	0	0	1.4	0	8	0	4.99	0	3	4.99	4.99	4.99	4.99	52	4.99	4.99	4.99	0	4.99
0	0	4.9	0	4.99	0	4.99	3	4.99	4.99	4.99	4.99	4.99	4.99	0	0	4.99	0	6.33	4.99
4.99	4.99	0	4.99	4	3	4.99	0	0	5	4.99	4.99	4.99	4.99	4.99	4.99	8	4.99	4.99	4.99
4.9	0	0	0	0	4.99	8	4	4	4.99	4.99	4.99	1	4.99	4.99	0	4.99	4.99	1.1	4.99
0	4.99	6.7	4.99	1	4.99	6.4	4.99	4.99	4.99	4.99	4.99	4.99	0	72.2	4.99	3.5	2.7	4.99	4.99
1	0	3	0.3	4.99	4.99	4.99	4.99	4.99	4.99	4.99	4.99	4.99	4.99	4.99	4.99	4.99	4.99	4.99	4.99
4.99	0	4.9	0	4.99	4.99	4.99	4.99	4.99	4.99	4.99	4.99	3.5	4.99	4.99	26	4.99	4.99	4.99	4.99
1	4.99	4.9	2	4.99	4.99	4.99	4.99	4.99	4.99	0	4.99	4.99	4.99	4.99	4.99	4.99	0	4.99	4.99
4.99	1	4.9	4.99	4.99	4.99	4.99	4.99	4.99	4.99	3.5	0	4.99	4.99	4.99	3.2	4.99	4.99	4.99
4.99	0	4.9	4.99	4.99	50	4.99	4.99	4.99	0	4.99	4.99	8	4.99	2.4	4.99	4.99	4.99	4.99
4.99	4.99	4.9	0	4.99	4.99	4.99	4.99	4.99	4.99	4.99	4.99	4.99	4.99	8	8	8	4.99	4.99
4.99	4.99	4.9	4.99	4.99	4.99	0	4.99	4.99	4.99	4.99	4.99	4.99	4.99	4.99	120	4.99	1	4.99
4.99	0.499	0	4.99	11	4.99	2.4	4.99	0	4.99	4.99	4.99		4.3			4.99	4.99
4.99	4.99	2.1	4.99	4.99	0	4.99	0	3	4.99	3.44	3.5		4.99			4.99
4.99	4.99	4.9	4.99	0	4.99	4.99	4.99	4.99	0.87	4.99			117			4.99
4.99	4.99	4.5	8	4.99	4.99	6.3	4.99	5	4.99				4.99
4.99	4.99	4.9	4.99	0	4.99	4.99	4.99	0.499					4.99
0.5	0		4.99	1.3	4.99	6.6	4.99	4.99
4.99	5.98		4.99	4.99	4.99		6	4.99
0	1		4.99	4.99	4		4.99	2.2
4.99	4.99		0	54	4.99		2.2	4.99
8	4.99		4.99	4.99	5.5
1.8	4.99		4.99	3.8
3.2	4.99		0.5	2.4
			4.99
			0.5
			4.99
			4.99
