# Supplementary material for: Evaluation of INSTAND e.V.’s external quality assessment for C-reactive protein and procalcitonin
Source: PLoS One. 2019 Aug 16;14(8):e0221426. doi: 10.1371/journal.pone.0221426 (PMC6697325; doi:10.1371/journal.pone.0221426)
Supplement: S2 Table — This table contains the raw results of the EQA participants without any correction. Results from obvious swap of samples are highlighted in green. Results that were excluded because they exceede the calibration by > 20% in at least one sample are highlighted in orange. (XLSX) [file pone.0221426.s002.xlsx]

## Sheet: PCT_high_all
PCT-EQA - All results,positive samples
Additional Information
This table contains the raw results of the EQA participants without any correction. Results from obvious swap of samples are highlighted in green. Results that were excluded because they exceede the calibration by > 20% are highlighted in orange
April 2008	November 2008	May 2009	November 2009	April 2010	November 2010	April 2011	November 2011	May 2012	November 2012	May 2013	November 2013	May 2014	November 2014	May 2015	November 2015	May 2016	November 2016	June 2017	November 2017
4	0.02	3.73	0.024	1.64	0.03	0.02	4	0.018	0.04	0	0.01	0.05	3.1	0	0.05	0.01	0.032	9.86	0.05
7.58	0.18	3.85	1.6	1.85	0.8	0.043	7.481	0.03	0.1	0.02	0.04	3	4.7	0.02	4.4	0.02	0.04	10	3.78
7.7	0.24	4.23	1.76	1.87	0.81	0.068	9.1	0.04	0.72	0.02	2.93	3.4	5.12	0.02	4.85	0.02	0.43	11.6	3.85
7.963	0.24	4.7	1.77	1.88	0.9	0.9	9.35	0.05	3	1.66	3	6.3	5.53	0.024	4.86	2	0.76	12	4.01
8	0.25	4.84	1.8	2.063	0.9	0.911	9.47	1.5	3.07	1.77	4.24	6.5	6	0.05	4.97	3.1	0.98	12.2	4.3
8.2	0.259	4.85	1.8	2.21	0.91	0.93	9.78	2.34	3.5	3	4.5	6.5	6.13	11.3	5.04	4.15	1.04	13.8	4.34
8.29	0.26	5.09	1.85	2.21	0.98	0.93	9.96	2.59	3.6	3.2	4.83	6.56	6.14	11.5	5.15	4.2	1.47	14.5	4.59
8.37	0.26	5.13	1.87	2.22	0.98	0.94	10	2.68	3.69	7.53	4.85	6.6	6.21	11.6	5.17	4.24	1.6	14.5	5
8.39	0.26	5.2	1.89	2.25	1	0.97	10.45	2.79	3.77	8.6	5	6.71	6.43	11.68	5.23	4.3	1.6	14.8	5.07
8.5	0.3	5.21	1.92	2.29	1.03	0.99	10.5	3	3.8	8.72	5.08	6.91	6.51	12.2	5.23	4.33	1.61	15.4	5.1
8.6	0.3	5.26	1.93	2.295	1.032	0.998	10.7	3.28	3.8	8.8	5.15	6.93	6.6	12.77	5.31	4.33	1.69	15.4	5.14
8.72	0.3	5.3	1.96	2.3	1.05	1	11.15	3.32	3.82	8.88	5.46	6.96	6.63	13.1	5.35	4.59	1.77	15.4	5.19
8.74	0.3	5.3	1.96	2.3	1.06	1	11.16	3.32	3.84	9.03	5.56	7	6.65	13.4	5.35	4.63	2.14	15.5	5.25
8.8	0.3	5.4	1.99	2.31	1.06	1	11.18	3.34	3.86	9.04	5.59	7.03	6.69	13.46	5.35	4.9	2.2	15.6	5.335
8.93	0.3	5.45	1.99	2.32	1.08	1.03	11.3	3.35	3.9	9.1	5.66	7.1	6.7	13.7	5.35	4.92	2.34	15.7	5.5
9.15	0.3	5.49	1.99	2.34	1.08	1.04	11.32	3.39	3.91	9.11	5.82	7.17	6.71	13.8	5.38	5.04	2.38	15.9	5.52
9.26	0.303	5.5	2	2.37	1.09	1.045	11.36	3.39	3.92	9.15	5.82	7.28	6.74	13.84	5.4	5.08	2.4	15.9	5.58
9.26	0.31	5.5	2	2.37	1.09	1.06	11.4	3.4	4.04	9.2	5.88	7.34	6.76	13.9	5.42	5.13	2.45	16.2	5.6
9.29	0.31	5.57	2	2.38	1.1	1.06	11.47	3.4	4.07	9.25	5.88	7.35	6.76	13.9	5.42	5.49	2.48	16.3	5.6
9.48	0.31	5.65	2	2.39	1.1	1.08	11.47	3.4	4.07	9.32	5.9	7.35	6.78	14	5.47	5.57	2.5	16.4	5.6
9.75	0.32	5.65	2.01	2.4	1.11	1.09	11.54	3.4	4.1	9.49	5.91	7.39	6.85	14.3	5.48	5.57	2.52	16.4	5.63
9.78	0.33	5.75	2.01	2.43	1.11	1.1	11.56	3.4	4.1	9.51	5.99	7.44	6.88	14.4	5.48	5.61	2.59	16.5	5.64
9.82	0.33	5.77	2.02	2.44	1.11	1.11	11.57	3.4	4.13	9.57	6	7.47	6.88	14.4	5.5	5.66	2.63	16.5	5.65
9.95	0.33	5.77	2.02	2.44	1.11	1.11	11.6	3.41	4.18	9.75	6	7.48	6.9	14.42	5.52	5.7	2.68	16.7	5.66
10	0.33	5.79	2.03	2.45	1.11	1.11	11.62	3.41	4.19	9.93	6.02	7.48	6.92	14.5	5.59	5.78	2.74	16.7	5.68
10	0.34	5.8	2.04	2.48	1.12	1.11	11.64	3.45	4.23	9.98	6.05	7.55	6.95	14.6	5.63	5.81	2.76	16.8	5.68
10	0.35	5.82	2.04	2.49	1.13	1.11	11.69	3.45	4.24	10	6.08	7.56	6.95	14.66	5.69	5.83	2.82	16.8	5.7
10	0.35	5.84	2.06	2.5	1.13	1.13	11.74	3.46	4.25	10	6.09	7.56	6.97	14.75	5.7	5.88	2.83	16.9	5.72
10	0.35	5.84	2.09	2.5	1.15	1.15	11.77	3.47	4.26	10	6.13	7.56	7.05	14.82	5.7	5.88	2.8395	17	5.72
10.18	0.35	5.86	2.09	2.51	1.15	1.16	11.8	3.48	4.3	10.01	6.14	7.6	7.06	14.9	5.7	5.92	2.87	17	5.73
10.2	0.35	5.9	2.1	2.51	1.16	1.17	11.9	3.49	4.32	10.05	6.14	7.62	7.08	14.9	5.7	5.94	2.89	17.1	5.77
10.3	0.353	5.91	2.1	2.52	1.16	1.17	11.93	3.5	4.32	10.1	6.22	7.66	7.08	15	5.75	5.95	2.91	17.1	5.8
10.3	0.36	5.95	2.1	2.52	1.16	1.18	11.96	3.5	4.32	10.11	6.23	7.67	7.08	15.03	5.75	5.96	2.92	17.2	5.8
10.4	0.36	5.97	2.125	2.55	1.16	1.19	12	3.51	4.35	10.17	6.25	7.69	7.1	15.05	5.77	5.99	2.94	17.2	5.8
10.4	0.36	6	2.13	2.56	1.17	1.19	12	3.53	4.39	10.25	6.26	7.72	7.1	15.2	5.78	6	2.94	17.3	5.82
10.4	0.36	6	2.13	2.57	1.17	1.2	12.1	3.55	4.42	10.29	6.27	7.73	7.1	15.37	5.79	6	2.95	17.3	5.83
10.49	0.36	6	2.14	2.57	1.17	1.2	12.1	3.57	4.46	10.29	6.28	7.77	7.14	15.4	5.79	6.01	2.97	17.3	5.83
10.57	0.36	6.01	2.15	2.58	1.17	1.2	12.1	3.57	4.5	10.35	6.3	7.77	7.16	15.4	5.8	6.06	2.98	17.4	5.85
10.6	0.36	6.01	2.15	2.59	1.17	1.2	12.1	3.58	4.51	10.4	6.33	7.79	7.17	15.6	5.81	6.07	3	17.4	5.85
10.7	0.367	6.08	2.16	2.59	1.17	1.21	12.1	3.58	4.54	10.44	6.33	7.8	7.19	15.77	5.83	6.09	3	17.4	5.85
10.7	0.37	6.09	2.17	2.6	1.17	1.21	12.14	3.59	4.6	10.5	6.34	7.81	7.2	15.8	5.85	6.1	3.06	17.4	5.87
10.71	0.37	6.14	2.17	2.64	1.17	1.22	12.2	3.64	4.6	10.6	6.37	7.84	7.21	15.8	5.86	6.1	3.09	17.4	5.87
10.73	0.37	6.16	2.17	2.64	1.18	1.22	12.2	3.68	4.67	10.6	6.37	7.85	7.22	15.9	5.87	6.13	3.11	17.5	5.88
10.74	0.37	6.2	2.19	2.66	1.19	1.22	12.3	3.68	4.67	10.63	6.38	7.85	7.23	15.9	5.87	6.15	3.14	17.5	5.88
10.75	0.38	6.21	2.2	2.66	1.2	1.22	12.3	3.69	4.67	10.66	6.4	7.86	7.23	16.04	5.88	6.16	3.18	17.5	5.9
10.76	0.38	6.22	2.2	2.67	1.227	1.23	12.34	3.72	4.69	10.7	6.4	7.88	7.23	16.1	5.9	6.16	3.2	17.6	5.9
10.78	0.387	6.24	2.2	2.67	1.23	1.23	12.41	3.76	4.7	10.7	6.41	7.91	7.27	16.2	5.9	6.18	3.21	17.7	5.91
10.79	0.39	6.3	2.2	2.68	1.23	1.24	12.5	3.76	4.71	10.76	6.41	7.92	7.3	16.3	5.91	6.2	3.22	17.8	5.93
10.93	0.39	6.31	2.2	2.68	1.23	1.25	12.5	3.761	4.73	10.8	6.46	7.92	7.3	16.34	5.92	6.22	3.26	17.8	5.94
11	0.4	6.31	2.2	2.7	1.23	1.26	12.68	3.77	4.76	10.8	6.47	7.93	7.31	16.44	5.95	6.22	3.28	17.9	5.94
11	0.4	6.33	2.21	2.7	1.23	1.26	12.7	3.8	4.78	10.8	6.47	7.94	7.31	16.45	5.96	6.25	3.3	18	5.95
11.03	0.4	6.34	2.21	2.7	1.24	1.26	12.87	3.8	4.82	10.8	6.47	7.95	7.32	16.48	5.96	6.27	3.33	18	5.99
11.09	0.4	6.35	2.21	2.71	1.24	1.27	12.9	3.81	4.82	10.8	6.48	7.96	7.32	16.485	5.97	6.29	3.34	18	5.99
11.1	0.4	6.35	2.22	2.72	1.24	1.27	13.03	3.85	4.83	10.8	6.48	7.98	7.35	16.5	5.97	6.29	3.35	18.1	6
11.1	0.4	6.36	2.22	2.72	1.245	1.27	13.05	3.85	4.84	10.86	6.48	7.99	7.38	16.56	5.98	6.29	3.35	18.2	6.01
11.27	0.4	6.39	2.22	2.74	1.25	1.275	13.08	3.87	4.86	10.9	6.51	8	7.38	16.59	5.98	6.3	3.38	18.2	6.02
11.4	0.4	6.4	2.22	2.74	1.25	1.279	13.1	3.91	4.87	10.9	6.51	8.02	7.38	16.77	5.99	6.3	3.38	18.2	6.02
11.5	0.4	6.4	2.23	2.74	1.25	1.28	13.11	3.92	4.88	10.9	6.59	8.02	7.45	16.8	6	6.3	3.4	18.2	6.03
11.57	0.41	6.4	2.23	2.74	1.25	1.28	13.16	3.93	4.9	10.92	6.62	8.06	7.45	16.8	6	6.31	3.41	18.3	6.04
11.7	0.41	6.4	2.24	2.75	1.25	1.28	13.4	3.93	5	10.94	6.62	8.06	7.47	16.82	6.01	6.31	3.43	18.3	6.04
11.7	0.41	6.4	2.24	2.75	1.25	1.28	13.4	4	5.04	10.98	6.65	8.07	7.5	16.92	6.01	6.39	3.44	18.4	6.06
12.1	0.41	6.41	2.25	2.75	1.26	1.28	13.46	4	5.05	10.98	6.65	8.08	7.5	17.09	6.01	6.4	3.59	18.5	6.07
12.1	0.41	6.47	2.26	2.76	1.26	1.281	13.5	4.01	5.08	10.99	6.66	8.08	7.5	17.1	6.02	6.41	3.59	18.5	6.07
12.2	0.41	6.49	2.26	2.78	1.27	1.285	13.51	4.02	5.08	11	6.67	8.09	7.52	17.1	6.03	6.42	3.59	18.5	6.08
12.4	0.42	6.49	2.26	2.79	1.28	1.29	13.62	4.025	5.09	11	6.69	8.1	7.53	17.11	6.03	6.44	3.61	18.5	6.09
12.5	0.42	6.5	2.27	2.79	1.28	1.29	13.69	4.03	5.1	11	6.7	8.1	7.59	17.2	6.03	6.46	3.61	18.5	6.1
12.53	0.42	6.5	2.27	2.79	1.28	1.29	13.76	4.08	5.12	11	6.7	8.1	7.6	17.22	6.04	6.47	3.63	18.5	6.1
12.6	0.42	6.56	2.29	2.79	1.28	1.3	13.9	4.1	5.14	11	6.7	8.12	7.7	17.26	6.05	6.49	3.65	18.5	6.1
12.7	0.42	6.58	2.29	2.82	1.28	1.3	13.9	4.1	5.15	11.01	6.71	8.13	7.72	17.28	6.07	6.49	3.65	18.8	6.12
12.7	0.42	6.59	2.29	2.83	1.28	1.3	13.9	4.1	5.16	11.02	6.71	8.13	7.73	17.3	6.07	6.49	3.66	18.8	6.14
12.7	0.42	6.6	2.3	2.83	1.29	1.3	13.9	4.1	5.16	11.04	6.77	8.14	7.75	17.3	6.09	6.5	3.67	18.8	6.15
12.87	0.42	6.641	2.3	2.84	1.29	1.3	13.93	4.11	5.2	11.05	6.78	8.15	7.77	17.4	6.1	6.5	3.68	18.9	6.15
12.9	0.42	6.65	2.32	2.86	1.29	1.3	14	4.12	5.25	11.1	6.78	8.2	7.78	17.4	6.12	6.52	3.7	18.9	6.16
13.1	0.43	6.66	2.32	2.87	1.3	1.31	14	4.13	5.25	11.1	6.79	8.2	7.78	17.44	6.14	6.52	3.7	18.9	6.17
13.4	0.43	6.67	2.33	2.88	1.3	1.31	14.035	4.15	5.25	11.12	6.79	8.23	7.8	17.5	6.15	6.53	3.7	18.9	6.17
13.42	0.43	6.68	2.33	2.89	1.31	1.32	14.1	4.15	5.25	11.12	6.8	8.23	7.8	17.5	6.18	6.54	3.7	19	6.18
13.52	0.43	6.71	2.34	2.89	1.31	1.33	14.13	4.16	5.26	11.16	6.8	8.24	7.81	17.55	6.18	6.55	3.71	19	6.18
13.9	0.43	6.75	2.35	2.89	1.31	1.33	14.17	4.16	5.27	11.2	6.8	8.25	7.87	17.6	6.19	6.57	3.71	19	6.2
13.9	0.434	6.75	2.35	2.89	1.31	1.33	14.2	4.16	5.27	11.24	6.81	8.255	7.89	17.63	6.19	6.58	3.72	19.1	6.2
14	0.44	6.797	2.4	2.89	1.315	1.33	14.2	4.17	5.28	11.3	6.82	8.28	7.89	17.7	6.19	6.58	3.72	19.2	6.2
14.04	0.44	6.8	2.4	2.9	1.316	1.33	14.2	4.19	5.29	11.3	6.84	8.29	7.89	17.79	6.19	6.58	3.73	19.2	6.21
14.3	0.44	6.8	2.4	2.9	1.32	1.35	14.26	4.2	5.3	11.3	6.84	8.3	7.9	17.8	6.21	6.59	3.75	19.2	6.25
14.5	0.44	6.8	2.4	2.9	1.32	1.35	14.35	4.2	5.3	11.3	6.84	8.3	7.92	17.82	6.22	6.6	3.76	19.2	6.25
14.9	0.44	6.85	2.4	2.9	1.33	1.35	14.36	4.2	5.3	11.3	6.86	8.3	7.93	17.91	6.235	6.6	3.77	19.3	6.25
14.9	0.45	6.85	2.4	2.92	1.33	1.35	14.4	4.2	5.3	11.3	6.86	8.34	7.96	17.91	6.24	6.61	3.79	19.4	6.26
15	0.45	6.86	2.41	2.93	1.33	1.35	14.45	4.21	5.32	11.35	6.86	8.38	7.98	17.95	6.24	6.62	3.81	19.4	6.27
15.1	0.46	6.87	2.41	2.93	1.33	1.36	14.47	4.21	5.32	11.35	6.88	8.4	8	18	6.28	6.62	3.81	19.4	6.28
15.32	0.47	6.88	2.43	2.94	1.34	1.36	14.49	4.21	5.37	11.39	6.9	8.4	8	18	6.29	6.62	3.825	19.5	6.3
15.4	0.47	6.9	2.43	2.94	1.34	1.36	14.5	4.22	5.37	11.4	6.9	8.4	8.06	18.01	6.29	6.64	3.83	19.5	6.3
15.5	0.48	6.94	2.45	2.96	1.34	1.37	14.5	4.22	5.4	11.4	6.92	8.41	8.06	18.04	6.3	6.65	3.84	19.5	6.31
15.59	0.484	6.95	2.45	2.994	1.35	1.37	14.5	4.24	5.4	11.4	6.93	8.43	8.08	18.05	6.32	6.65	3.85	19.5	6.31
15.6	0.5	7	2.47	3	1.35	1.37	14.52	4.24	5.4	11.4	6.94	8.44	8.09	18.16	6.35	6.68	3.88	19.5	6.33
16.11	0.5	7	2.49	3	1.35	1.37	14.7	4.24	5.4	11.4	6.95	8.45	8.14	18.2	6.37	6.69	3.88	19.6	6.35
16.4	0.51	7.1	2.49	3	1.36	1.37	14.74	4.25	5.4	11.5	6.97	8.47	8.16	18.2	6.38	6.7	3.92	19.6	6.36
16.5	0.65	7.1	2.5	3.03	1.36	1.379	14.75	4.28	5.42	11.5	7	8.47	8.19	18.2	6.38	6.7	3.93	19.6	6.38
16.6	1.7	7.16	2.5	3.03	1.36	1.38	14.8	4.29	5.44	11.5	7	8.48	8.2	18.3	6.39	6.7	3.98	19.7	6.39
17		7.18	2.51	3.04	1.36	1.38	14.9	4.3	5.45	11.5	7.01	8.5	8.2	18.3	6.4	6.71	3.98	19.8	6.4
18		7.4	2.53	3.05	1.36	1.38	14.91	4.3	5.47	11.5	7.03	8.52	8.26	18.3	6.4	6.71	3.99	19.8	6.4
18.6		7.57	2.55	3.05	1.37	1.38	14.99	4.3	5.49	11.5	7.04	8.55	8.31	18.3	6.4	6.71	4	19.8	6.43
18.91		7.88	2.6	3.06	1.37	1.38	15	4.32	5.5	11.5	7.04	8.55	8.34	18.4	6.41	6.72	4.01	19.8	6.44
19.2		7.9	2.62	3.07	1.37	1.38	15	4.33	5.51	11.51	7.04	8.57	8.38	18.46	6.47	6.72	4.01	19.8	6.44
19.3		7.94	2.64	3.07	1.38	1.39	15	4.34	5.51	11.57	7.05	8.58	8.48	18.47	6.5	6.73	4.05	19.9	6.45
19.35		8.11	2.69	3.08	1.38	1.39	15	4.35	5.52	11.58	7.06	8.6	8.5	18.48	6.52	6.75	4.05	20	6.45
		8.15	2.71	3.08	1.38	1.39	15.04	4.42	5.53	11.6	7.07	8.6	8.8	18.5	6.54	6.76	4.05	20	6.49
		8.34	2.713	3.09	1.38	1.4	15.1	4.45	5.53	11.6	7.08	8.61	8.8	18.5	6.55	6.77	4.06	20	6.49
		8.63	2.75	3.1	1.38	1.41	15.1	4.47	5.57	11.6	7.09	8.68	8.99	18.5	6.56	6.77	4.07	20.1	6.5
		8.64	2.79	3.1	1.38	1.41	15.1	4.5	5.6	11.6	7.09	8.7	9.19	18.5	6.57	6.78	4.1	20.1	6.5
		8.64	2.82	3.1	1.39	1.41	15.1	4.5	5.6	11.6	7.09	8.751	9.22	18.5	6.58	6.78	4.1	20.2	6.52
		8.65	2.85	3.11	1.39	1.42	15.12	4.5	5.6	11.6	7.11	8.77	9.29	18.5	6.58	6.8	4.1	20.2	6.53
		8.77	2.87	3.12	1.39	1.42	15.15	4.55	5.61	11.69	7.16	8.78	9.33	18.53	6.61	6.81	4.14	20.4	6.53
		8.95	2.89	3.2	1.396	1.43	15.2	4.56	5.61	11.7	7.21	8.78	9.35	18.6	6.62	6.82	4.14	20.4	6.53
		8.96	2.9	3.2	1.4	1.43	15.3	4.57	5.62	11.7	7.21	8.82	9.39	18.6	6.62	6.84	4.14	20.4	6.55
		9.2	2.9	3.22	1.4	1.43	15.32	4.57	5.64	11.7	7.23	8.82	9.5	18.6	6.62	6.89	4.14	20.5	6.55
		9.24	2.9	3.35	1.4	1.43	15.32	4.63	5.65	11.75	7.24	8.83	9.52	18.61	6.64	6.91	4.15	20.5	6.56
		9.31	2.9	3.43	1.4	1.44	15.37	4.65	5.67	11.8	7.25	8.84	9.7	18.65	6.68	6.915	4.17	20.6	6.56
		9.34	2.91	3.52	1.4	1.44	15.4	4.67	5.68	11.8	7.26	8.9	9.75	18.68	6.69	6.94	4.18	20.6	6.56
		9.38	2.96	3.61	1.44	1.44	15.4	4.69	5.7	11.8	7.27	8.9	9.75	18.76	6.7	6.95	4.19	20.6	6.57
		9.4	2.96	3.66	1.44	1.45	15.4	4.7	5.72	11.82	7.29	8.91	9.77	18.82	6.7	6.95	4.2	20.7	6.58
		9.4	2.96	3.81	1.48	1.45	15.4	4.7	5.73	11.82	7.3	8.93	9.82	18.83	6.7	6.98	4.24	20.8	6.58
		9.53	2.98	3.88	1.48	1.45	15.4	4.71	5.73	11.84	7.37	8.93	9.82	18.9	6.71	7	4.26	20.8	6.6
		9.58	2.98	3.9	1.49	1.45	15.4	4.797	5.74	11.85	7.37	8.97	9.86	18.9	6.76	7.02	4.27	20.9	6.6
		9.6	3	3.94	1.49	1.45	15.5	4.84	5.78	11.86	7.4	8.99	10	18.93	6.8	7.02	4.28	20.9	6.6
		9.7	3	3.95	1.5	1.47	15.52	4.86	5.79	11.88	7.4	9	10	19	6.83	7.03	4.29	20.9	6.61
		9.78	3.03	4.07	1.5	1.47	15.59	4.86	5.79	11.9	7.41	9.01	10.01	19	6.92	7.05	4.3	21	6.62
		9.9	3.04	4.14	1.5	1.47	15.6	4.87	5.79	11.9	7.428	9.05	10.05	19.04	6.95	7.06	4.32	21	6.63
		10	3.05	4.14	1.5	1.47	15.65	4.89	5.81	11.9	7.43	9.07	10.3	19.08	7.02	7.1	4.32	21	6.63
		10.1	3.07	4.16	1.51	1.48	15.68	4.96	5.84	11.93	7.5	9.07	10.4	19.1	7.03	7.12	4.34	21	6.64
		10.2	3.08	4.16	1.52	1.49	15.7	4.97	5.85	12	7.53	9.09	10.45	19.1	7.04	7.17	4.34	21.2	6.65
		10.4	3.08	4.18	1.52	1.5	15.71	5.01	5.87	12	7.55	9.1	10.61	19.1	7.1	7.2	4.35	21.3	6.66
		10.4	3.15	4.2	1.53	1.5	15.74	5.07	5.87	12	7.55	9.1	10.65	19.2	7.16	7.2	4.36	21.3	6.67
		10.56	3.17	4.22	1.56	1.5	15.8	5.1	5.9	12.05	7.57	9.1	10.71	19.2	7.17	7.2	4.36	21.3	6.69
		10.8	3.19	4.26	1.58	1.5	15.85	5.1	5.9	12.09	7.58	9.12	10.8	19.27	7.2	7.21	4.36	21.4	6.7
			3.2	4.29	1.6	1.5	15.91	5.3	5.91	12.1	7.59	9.16	10.8	19.29	7.2	7.22	4.37	21.4	6.708
			3.2	4.29	1.6	1.51	16	5.31	5.911	12.1	7.6	9.16	10.8	19.3	7.2	7.22	4.37	21.5	6.71
			3.2	4.31	1.61	1.51	16	5.31	5.94	12.11	7.64	9.17	10.83	19.3	7.24	7.23	4.38	21.5	6.72
			3.2	4.32	1.62	1.51	16.1	5.33	6	12.14	7.65	9.2	10.9	19.32	7.27	7.25	4.38	21.5	6.73
			3.23	4.35	1.62	1.51	16.11	5.34	6	12.19	7.659	9.25	11	19.44	7.3	7.25	4.4	21.6	6.73
			3.24	4.42	1.62	1.52	16.15	5.39	6.04	12.2	7.67	9.25	11.03	19.47	7.32	7.26	4.4	21.6	6.73
			3.25	4.42	1.63	1.52	16.16	5.4	6.1	12.27	7.7	9.27	11.1	19.6	7.32	7.29	4.4	21.7	6.73
			3.28	4.44	1.64	1.52	16.2	5.4	6.2	12.3	7.7	9.27	11.1	19.63	7.33	7.3	4.41	21.7	6.73
			3.29	4.47	1.64	1.54	16.2	5.4	6.27	12.3	7.72	9.274	11.4	19.7	7.34	7.31	4.43	21.7	6.78
			5.7	4.47	1.64	1.54	16.24	5.5	6.28	12.34	7.73	9.29	11.4	19.73	7.36	7.33	4.45	21.8	6.79
			10.8	4.48	1.64	1.55	16.3	5.51	6.29	12.4	7.75	9.34	11.4	19.8	7.4	7.35	4.46	21.8	6.79
				4.5	1.65	1.55	16.37	5.51	6.31	12.4	7.76	9.4	11.46	19.85	7.4	7.3785	4.47	21.9	6.81
				4.5	1.66	1.55	16.4	5.55	6.35	12.4	7.77	9.43	11.6	19.89	7.42	7.415	4.47	22	6.815
				4.55	1.67	1.55	16.48	5.56	6.4	12.4	7.79	9.45	11.7	20	7.44	7.42	4.47	22	6.82
				4.56	1.67	1.55	16.5	5.58	6.4	12.42	7.84	9.48	11.71	20.1	7.45	7.46	4.51	22	6.83
				4.58	1.67	1.55	16.6	5.593	6.46	12.5	7.86	9.53	11.75	20.1	7.5	7.5	4.52	22	6.835
				4.59	1.67	1.55	16.6	5.61	6.47	12.5	7.86	9.55	11.8	20.1	7.5	7.54	4.56	22	6.88
				4.62	1.67	1.55	16.8	5.66	6.53	12.51	7.9	9.57	11.8	20.3	7.503	7.56	4.56	22	6.88
				4.64	1.68	1.56	17.6	5.67	6.57	12.6	7.9	9.6	11.9	20.4	7.56	7.56	4.59	22.1	6.89
					1.68	1.57	17.8	5.67	6.6	12.6	7.92	9.61	12	20.4	7.61	7.61	4.6	22.1	6.89
					1.7	1.58	18	5.78	6.679	12.81	7.96	9.62	12.5	20.6	7.62	7.61	4.63	22.1	6.89
					1.71	1.58	18.29	5.8	6.7	12.9	7.96	9.63	12.61	20.67	7.71	7.7	4.66	22.4	6.9
					1.75	1.58	18.3	5.8	6.71	12.9	7.96	9.67	12.68	20.9	7.75	7.71	4.7	22.5	6.907
					1.75	1.58	18.3	5.81	6.74	13.08	7.974	9.69	12.72	20.9	7.76	7.77	4.75	22.5	6.95
					1.76	1.59	18.4	5.81	6.75	13.09	7.98	9.7	12.75	20.95	7.79	7.79	4.77	22.6	6.97
					1.83	1.59	18.4	5.84	6.8	13.12	7.99	9.75	12.82	21.1	7.9	7.82	4.82	22.6	7
					2	1.59	18.8	5.91	6.804	13.26	7.993	9.77	12.91	21.2	7.9	7.834	4.82	22.8	7
						1.59	19	5.93	6.85	13.4	8.05	9.8	12.93	21.28	8.16	7.85	4.84	23	7
						1.594	19.39	5.98	6.9	13.45	8.05	9.82	13.2	21.36	8.2	7.9	4.85	23	7
						1.6	19.8	6	6.96	13.5	8.07	9.829	13.3	21.4	8.27	7.9	4.89	23.3	7.02
						1.6	19.97	6	6.97	13.8	8.09	9.9	13.4	21.43	8.3	7.98	4.92	23.3	7.06
						1.6	19.97	6	7.01	14.14	8.1	9.91	13.9	21.48	8.31	8	4.94	23.4	7.07
						1.6	20.1	6.02	7.02	14.28	8.1	9.94	14	21.6	8.31	8.053	4.94	23.5	7.12
						1.6	20.1	6.13	7.04	14.38	8.13	9.94	14.03	21.6	8.44	8.074	5	23.6	7.12
						1.6	20.1	6.15	7.08	14.4	8.15	9.94	14.1	21.6	8.45	8.09	5	24	7.23
						1.6	20.24	6.2	7.08	14.4	8.15	9.95	14.1	21.69	8.54	8.1	5.04	24	7.24
						1.62	20.29	6.21	7.1	14.4	8.19	10	14.1	21.7	8.54	8.15	5.07	24	7.27
						1.62	20.4	6.21	7.11	14.44	8.19	10.3	14.12	21.78	8.57	8.2	5.07	24.2	7.32
						1.624	20.48	6.24	7.12	14.5	8.2	10.4	14.19	21.81	8.58	8.32	5.1	24.4	7.399
						1.63	20.65	6.25	7.15	14.51	8.23	10.46	14.3	22.07	8.58	8.38	5.1	24.6	7.54
						1.64	20.9	6.26	7.16	14.7	8.24	10.49	14.37	22.1	8.59	8.4	5.1	24.7	7.543
						1.64	21	6.28	7.2	14.71	8.25	10.5	14.37	22.12	8.61	8.42	5.18	24.8	7.55
						1.65	21.1	6.29	7.2	14.82	8.33	10.5	14.4	22.6	8.62	8.44	5.18	24.8	7.74
						1.65	21.11	6.3	7.27	14.9	8.35	10.59	14.49	22.7	8.7	8.45	5.2	24.9	7.79
						1.66	21.5	6.3	7.33	15.06	8.37	10.6	14.5	22.8	8.8	8.45	5.2	25	7.83
						1.66	21.5	6.31	7.33	15.1	8.4	10.8	14.5	23.1	8.85	8.47	5.21	25.2	7.83
						1.69	21.81	6.34	7.35	15.1	8.44	10.8	14.51	23.4	8.86	8.47	5.22	25.2	7.84
						1.7	22.2	6.36	7.37	15.21	8.45	10.88	14.53	23.6	8.86	8.53	5.26	25.3	7.88
						1.7	22.4	6.39	7.41	15.28	8.5	10.9	14.6	23.71	8.9	8.56	5.27	25.7	7.97
						1.72	22.42	6.4	7.42	15.4	8.5	10.98	14.74	23.8	8.92	8.59	5.32	25.8	8.11
						1.74	22.5	6.4	7.46	15.4	8.55	11.01	14.8	23.85	8.92	8.65	5.48	25.9	8.2
						1.75	22.5	6.43	7.47	15.4	8.59	11.02	14.82	24	8.94	8.66	5.5	25.9	8.2
						1.75	22.56	6.43	7.48	15.45	8.61	11.04	14.87	24.09	8.98	8.73	5.52	25.9	8.22
						1.79	22.6	6.5	7.52	15.45	8.66	11.1	14.88	24.5	9.01	8.8	5.55	26.5	8.28
						1.8	22.6	6.5	7.55	15.46	8.67	11.1	14.98	25.34	9.01	8.84	5.55	26.8	8.3
						1.82	22.7	6.52	7.58	15.6	8.73	11.1	15	25.5	9.02	8.93	5.77	26.8	8.37
						1.83	22.93	6.53	7.6	15.64	8.75	11.2	15.03	25.5	9.03	9	5.78	26.9	8.5
						1.84	23	6.55	7.6	15.68	8.78	11.2	15.1	25.58	9.04	9.08	5.89	27	8.5
						1.85	23.09	6.57	7.6	15.7	8.81	11.2	15.2	25.6	9.05	9.09	6.04	27.3	8.55
						1.86	23.1	6.58	7.61	15.7	8.82	11.25	15.2	25.8	9.1	9.1	6.05	27.6	8.55
						1.9	23.11	6.6	7.62	15.7	8.9	11.28	15.27	26	9.12	9.1	6.08	27.9	8.57
						1.9	23.18	6.61	7.62	15.8	8.92	11.3	15.3	26.01	9.15	9.16	6.09	28	8.59
						1.97	23.2	6.61	7.62	15.8	8.94	11.36	15.31	26.1	9.29	9.19	6.29	28	8.63
						2	23.4	6.65	7.66	15.8	8.96	11.39	15.41	26.2	9.3	9.22		28.1	8.73
						2.01	24.3	6.68	7.7	15.83	8.97	11.4	15.44	26.3	9.38	9.28		29	8.75
							26.96	6.69	7.7	15.87	8.99	11.46	15.5	26.5	9.63	9.3		29.6	8.79
								6.69	7.71	15.9	9.03	11.5	15.8	27.81	9.9	9.36		30.4	8.98
								6.74	7.73	15.9	9.03	11.5	15.85	27.91		9.4		31	9.01
								6.74	7.74	15.95	9.04	11.61	16	28.1		9.4		38.5	9.04
								6.75	7.74	16.18	9.18	11.7	16.2	99		9.4			9.51
								6.76	7.74	16.2	9.19	11.83	16.3			9.48			10
								6.78	7.77	16.2	9.2	11.88	16.31			9.5
								6.79	7.81	16.3	9.2	11.97	16.94			9.52
								6.8	7.82	16.3	9.2	11.99	17.48			9.52
								6.82	7.83	16.5	9.24	12	786			9.6
								6.84	7.84	16.6	9.28	12.07				10.3
								6.87	7.91	16.6	9.3	12.2				10.31
								6.88	7.96	16.68	9.38	12.2				10.4
								6.94	7.97	16.7	9.72	12.37				10.9
								6.97	7.97	16.8	9.73	12.75
								6.97	7.97	16.8	10.09	12.91
								6.98	7.99	16.85
								7.02	8	16.9
								7.09	8.07	17
								7.1	8.1	17.04
								7.2	8.19	17.16
									8.22	17.21
									8.32	17.3
									8.51	17.4
									8.52	17.9
									8.64
									10

## Sheet: PCT_low_all
PCT-EQA - All results,negative samples
Additional Information
This table contains the raw results of the EQA participants without any correction. Results from obvious swap of samples are highlighted in green. Results that were excluded because they exceede the calibration by > 20% are highlighted in orange
April 2008	November 2008	May 2009	November 2009	April 2010	November 2010	April 2011	November 2011	May 2012	November 2012	May 2013	November 2013	May 2014	November 2014	May 2015	November 2015	May 2016	November 2016	June 2017	November 2017
1	0.7	0.49	1.81	0.5	1.01	1.62	1	5.2	75	12.1	6.56	10.4	22	24.65	7.19	7.73	4.25	402	7.86
0.5	0.5	0.43	1.73	0.3	1	1.28	0.7	4.887	7.2	10.9	1	1	0.499	18.4	0.499	7.05	3.68	1.47	0.51
0.5	0.44	0.3	1	0.3	0.5	1.2	0.499	4.58	5.92	10	0.499	0.499	0.499	16.25	0.499	5	1	1.46	0.5
0.5	0.3	0.3	0.499	0.3	0.3	1	0.499	2	1	1	0.358	0.499	0.499	16.18	0.499	1.17	1	0.5	0.5
0.47	0.3	0.3	0.499	0.3	0.3	0.5	0.499	1	0.65	0.5	0.354	0.28	0.499	4.74	0.499	0.79	0.499	0.5	0.5
0.3	0.3	0.22	0.3	0.29	0.22	0.5	0.499	0.49	0.5	0.5	0.29	0.2	0.2	0.499	0.499	0.499	0.499	0.5	0.5
0.3	0.3	0.2	0.3	0.11	0.1	0.3	0.3	0.156	0.5	0.5	0.28	0.2	0.2	0.499	0.499	0.499	0.499	0.5	0.465
0.3	0.2	0.2	0.3	0.1	0.1	0.12	0.2	0.12	0.499	0.1	0.22	0.117	0.2	0.2	0.2	0.499	0.37	0.24	0.38
0.3	0.19	0.2	0.2	0.1	0.1	0.1	0.2	0.1	0.33	0.1	0.156	0.1	0.2	0.2	0.17	0.499	0.36	0.22	0.37
0.24	0.18	0.2	0.12	0.1	0.1	0.1	0.124	0.1	0.26	0.1	0.1	0.1	0.1	0.2	0.17	0.499	0.34	0.21	0.29
0.14	0.1	0.2	0.1	0.1	0.1	0.1	0.11	0.1	0.22	0.1	0.1	0.1	0.1	0.15	0.17	0.43	0.32	0.2	0.26
0.14	0.1	0.2	0.1	0.1	0.1	0.1	0.1	0.1	0.2	0.1	0.1	0.1	0.1	0.128	0.16	0.33	0.2	0.2	0.25
0.1	0.1	0.18	0.1	0.1	0.1	0.1	0.1	0.1	0.1	0.1	0.1	0.1	0.1	0.1	0.14	0.26	0.2	0.17	0.23
0.1	0.1	0.18	0.1	0.1	0.1	0.1	0.1	0.1	0.1	0.1	0.1	0.1	0.1	0.1	0.13	0.25	0.2	0.17	0.23
0.1	0.1	0.18	0.1	0.1	0.1	0.1	0.1	0.1	0.1	0.1	0.1	0.1	0.09	0.1	0.11	0.2	0.19	0.17	0.22
0.1	0.1	0.18	0.1	0.1	0.1	0.1	0.1	0.1	0.1	0.1	0.1	0.1	0.08	0.1	0.1	0.17	0.17	0.17	0.21
0.1	0.1	0.17	0.1	0.1	0.1	0.1	0.1	0.1	0.1	0.1	0.1	0.1	0.06	0.1	0.1	0.17	0.17	0.17	0.2
0.1	0.1	0.17	0.1	0.1	0.068	0.1	0.1	0.08	0.1	0.09	0.1	0.06	0.06	0.1	0.1	0.17	0.17	0.15	0.2
0.1	0.1	0.17	0.1	0.1	0.06	0.1	0.1	0.064	0.1	0.06	0.1	0.058	0.051	0.1	0.1	0.15	0.16	0.15	0.2
0.1	0.1	0.17	0.1	0.1	0.06	0.05	0.1	0.06	0.1	0.06	0.1	0.053	0.05	0.1	0.1	0.15	0.15	0.1	0.2
0.1	0.1	0.17	0.1	0.1	0.06	0.05	0.068	0.06	0.1	0.06	0.1	0.05	0.05	0.1	0.1	0.14	0.15	0.1	0.17
0.1	0.1	0.164	0.1	0.06	0.06	0.05	0.06	0.06	0.1	0.06	0.07	0.05	0.05	0.07	0.1	0.121	0.1	0.1	0.17
0.1	0.1	0.162	0.1	0.06	0.06	0.05	0.06	0.05	0.09	0.06	0.07	0.05	0.05	0.07	0.1	0.12	0.1	0.1	0.17
0.1	0.1	0.16	0.1	0.06	0.05	0.05	0.06	0.05	0.088	0.06	0.07	0.05	0.05	0.06	0.1	0.1	0.1	0.1	0.16
0.1	0.1	0.16	0.1	0.06	0.05	0.05	0.05	0.05	0.08	0.054	0.067	0.05	0.05	0.06	0.08	0.1	0.082	0.1	0.15
0.1	0.1	0.16	0.1	0.06	0.05	0.05	0.05	0.05	0.07	0.05	0.065	0.05	0.05	0.05	0.06	0.1	0.082	0.1	0.15
0.1	0.1	0.16	0.1	0.06	0.05	0.05	0.05	0.05	0.07	0.05	0.06	0.05	0.05	0.05	0.053	0.1	0.082	0.1	0.12
0.1	0.1	0.16	0.1	0.06	0.05	0.05	0.05	0.05	0.06	0.05	0.06	0.05	0.05	0.05	0.05	0.1	0.07	0.1	0.12
0.1	0.06	0.16	0.1	0.06	0.05	0.05	0.05	0.05	0.06	0.05	0.06	0.05	0.05	0.05	0.05	0.1	0.07	0.085	0.1
0.1	0.05	0.16	0.06	0.052	0.05	0.05	0.05	0.05	0.06	0.05	0.06	0.05	0.05	0.05	0.05	0.09	0.07	0.082	0.1
0.1	0.05	0.16	0.06	0.05	0.05	0.05	0.05	0.05	0.06	0.05	0.06	0.05	0.05	0.05	0.05	0.09	0.07	0.082	0.1
0.1	0.05	0.16	0.06	0.05	0.05	0.05	0.0499	0.05	0.06	0.05	0.056	0.05	0.05	0.05	0.05	0.082	0.07	0.082	0.1
0.1	0.05	0.159	0.06	0.05	0.05	0.05	0.0499	0.05	0.06	0.05	0.0527	0.05	0.05	0.05	0.05	0.082	0.06	0.06	0.1
0.1	0.05	0.15	0.06	0.05	0.05	0.05	0.0499	0.05	0.05	0.05	0.05	0.05	0.05	0.05	0.05	0.082	0.06	0.05	0.1
0.1	0.05	0.15	0.06	0.05	0.05	0.05	0.0499	0.05	0.05	0.05	0.05	0.05	0.05	0.05	0.05	0.06	0.06	0.05	0.099
0.1	0.05	0.15	0.0574	0.05	0.05	0.05	0.0499	0.05	0.05	0.05	0.05	0.05	0.05	0.05	0.05	0.06	0.052	0.05	0.082
0.1	0.05	0.15	0.05	0.05	0.05	0.05	0.0499	0.05	0.05	0.05	0.05	0.05	0.05	0.05	0.05	0.06	0.05	0.05	0.082
0.1	0.05	0.15	0.05	0.05	0.05	0.05	0.0499	0.05	0.05	0.05	0.05	0.05	0.05	0.05	0.05	0.06	0.05	0.05	0.082
0.09	0.05	0.15	0.05	0.05	0.05	0.05	0.0499	0.05	0.05	0.05	0.05	0.05	0.05	0.05	0.05	0.06	0.05	0.05	0.082
0.06	0.05	0.15	0.05	0.05	0.05	0.05	0.0499	0.05	0.05	0.05	0.05	0.05	0.05	0.05	0.05	0.06	0.05	0.05	0.082
0.05	0.05	0.15	0.05	0.05	0.05	0.05	0.0499	0.05	0.05	0.05	0.05	0.05	0.05	0.05	0.05	0.06	0.05	0.05	0.082
0.05	0.05	0.15	0.05	0.05	0.05	0.05	0.0499	0.05	0.05	0.05	0.05	0.05	0.05	0.05	0.05	0.06	0.05	0.05	0.06
0.05	0.05	0.15	0.05	0.05	0.05	0.05	0.0499	0.05	0.05	0.05	0.05	0.05	0.05	0.05	0.05	0.06	0.05	0.05	0.05
0.05	0.05	0.15	0.05	0.05	0.05	0.05	0.0499	0.05	0.05	0.05	0.05	0.05	0.05	0.05	0.05	0.06	0.05	0.05	0.05
0.05	0.05	0.147	0.05	0.05	0.05	0.05	0.0499	0.05	0.05	0.05	0.05	0.05	0.05	0.05	0.05	0.052	0.05	0.05	0.05
0.05	0.05	0.147	0.05	0.05	0.05	0.05	0.0499	0.05	0.05	0.05	0.05	0.05	0.05	0.05	0.05	0.051	0.05	0.05	0.05
0.05	0.05	0.14	0.05	0.05	0.05	0.05	0.0499	0.05	0.05	0.05	0.05	0.05	0.05	0.05	0.05	0.05	0.05	0.05	0.05
0.05	0.05	0.14	0.05	0.05	0.05	0.05	0.0499	0.05	0.0499	0.05	0.05	0.05	0.05	0.05	0.05	0.05	0.05	0.05	0.05
0.05	0.05	0.14	0.05	0.05	0.05	0.05	0.0499	0.05	0.0499	0.05	0.05	0.05	0.05	0.05	0.05	0.05	0.05	0.05	0.05
0.05	0.05	0.14	0.05	0.05	0.05	0.05	0.0499	0.05	0.0499	0.05	0.05	0.05	0.05	0.05	0.05	0.05	0.05	0.05	0.05
0.05	0.04	0.14	0.05	0.05	0.05	0.05	0.0499	0.05	0.0499	0.05	0.05	0.05	0.05	0.05	0.05	0.05	0.05	0.05	0.05
0.05	0.04	0.135	0.05	0.05	0.05	0.05	0.0499	0.05	0.0499	0.05	0.05	0.05	0.05	0.05	0.05	0.05	0.05	0.05	0.05
0.05	0.04	0.13	0.05	0.05	0.05	0.05	0.0499	0.05	0.0499	0.05	0.05	0.05	0.05	0.05	0.05	0.05	0.05	0.05	0.05
0.05	0.04	0.13	0.05	0.05	0.05	0.05	0.0499	0.05	0.0499	0.05	0.05	0.05	0.05	0.05	0.05	0.05	0.05	0.05	0.05
0.05	0.03	0.13	0.05	0.05	0.05	0.05	0.0499	0.05	0.0499	0.05	0.05	0.05	0.05	0.05	0.05	0.05	0.05	0.05	0.05
0.05	0.03	0.13	0.05	0.05	0.05	0.05	0.0499	0.05	0.0499	0.05	0.05	0.05	0.05	0.05	0.05	0.05	0.05	0.05	0.05
0.05	0.03	0.13	0.05	0.05	0.05	0.05	0.0499	0.05	0.0499	0.05	0.05	0.05	0.05	0.05	0.05	0.05	0.05	0.05	0.05
0.05	0.03	0.13	0.05	0.05	0.05	0.05	0.0499	0.05	0.0499	0.05	0.05	0.05	0.05	0.05	0.05	0.05	0.05	0.05	0.05
0.05	0.03	0.13	0.05	0.05	0.05	0.05	0.0499	0.05	0.0499	0.05	0.05	0.05	0.05	0.05	0.05	0.05	0.05	0.05	0.05
0.05	0.03	0.13	0.05	0.05	0.05	0.05	0.0499	0.05	0.0499	0.05	0.05	0.05	0.05	0.05	0.05	0.05	0.05	0.05	0.05
0.05	0.03	0.13	0.05	0.05	0.05	0.05	0.0499	0.05	0.0499	0.05	0.05	0.05	0.05	0.05	0.05	0.05	0.05	0.05	0.05
0.05	0.0251	0.129	0.05	0.05	0.05	0.05	0.0499	0.05	0.0499	0.05	0.05	0.05	0.05	0.05	0.05	0.05	0.05	0.05	0.05
0.05	0.02	0.129	0.05	0.049	0.05	0.05	0.0499	0.05	0.0499	0.05	0.05	0.05	0.05	0.05	0.05	0.05	0.05	0.05	0.05
0.05	0.02	0.12	0.05	0.046	0.05	0.05	0.0499	0.05	0.0499	0.05	0.05	0.05	0.05	0.05	0.05	0.05	0.05	0.05	0.05
0.05	0.02	0.12	0.05	0.044	0.05	0.05	0.0499	0.05	0.0499	0.05	0.05	0.05	0.05	0.05	0.05	0.05	0.05	0.05	0.05
0.05	0.02	0.12	0.05	0.042	0.05	0.05	0.0499	0.05	0.0499	0.05	0.05	0.05	0.05	0.05	0.05	0.05	0.05	0.05	0.05
0.04	0.02	0.115	0.05	0.04	0.05	0.05	0.0499	0.05	0.0499	0.05	0.05	0.05	0.05	0.05	0.05	0.05	0.05	0.05	0.05
0.04	0.02	0.111	0.05	0.04	0.05	0.05	0.0499	0.05	0.0499	0.05	0.05	0.05	0.05	0.05	0.05	0.05	0.05	0.04	0.05
0.04	0.02	0.11	0.05	0.04	0.048	0.05	0.0499	0.05	0.0499	0.05	0.05	0.05	0.05	0.05	0.05	0.05	0.05	0.04	0.05
0.04	0.02	0.11	0.05	0.04	0.048	0.05	0.0499	0.05	0.0499	0.05	0.05	0.05	0.05	0.05	0.05	0.05	0.05	0.04	0.05
0.0353	0.02	0.11	0.05	0.04	0.044	0.05	0.0499	0.05	0.0499	0.05	0.05	0.05	0.05	0.05	0.04	0.05	0.05	0.031	0.05
0.03	0.02	0.11	0.05	0.04	0.04	0.05	0.0499	0.05	0.0499	0.05	0.05	0.05	0.05	0.05	0.04	0.05	0.05	0.03	0.05
0.03	0.02	0.11	0.05	0.04	0.04	0.04	0.0499	0.05	0.0499	0.05	0.05	0.05	0.05	0.04	0.04	0.05	0.05	0.03	0.04
0.03	0.02	0.11	0.05	0.04	0.04	0.04	0.0499	0.05	0.0499	0.05	0.05	0.05	0.05	0.04	0.04	0.05	0.05	0.03	0.04
0.03	0.02	0.11	0.05	0.037	0.04	0.04	0.0499	0.05	0.0499	0.05	0.05	0.05	0.05	0.04	0.038	0.05	0.05	0.03	0.04
0.03	0.02	0.11	0.05	0.032	0.04	0.04	0.0499	0.05	0.0499	0.05	0.05	0.05	0.05	0.04	0.037	0.05	0.05	0.028	0.035
0.025	0.02	0.11	0.05	0.032	0.04	0.04	0.0499	0.05	0.0499	0.05	0.05	0.05	0.042	0.038	0.036	0.05	0.05	0.025	0.034
0.02	0.02	0.11	0.05	0.031	0.04	0.04	0.0499	0.05	0.0499	0.05	0.05	0.05	0.04	0.03	0.033	0.05	0.05	0.025	0.0325
0.02	0.02	0.11	0.05	0.03	0.04	0.04	0.0499	0.05	0.0499	0.05	0.05	0.05	0.04	0.03	0.03	0.05	0.05	0.023	0.0311
0.02	0.02	0.106	0.047	0.03	0.039	0.032	0.0499	0.05	0.0499	0.05	0.05	0.0431	0.04	0.03	0.03	0.05	0.05	0.021	0.031
0.02	0.02	0.1	0.043	0.03	0.038	0.032	0.0499	0.05	0.0499	0.05	0.05	0.041	0.04	0.03	0.03	0.05	0.05	0.021	0.031
0.02	0.02	0.1	0.04	0.03	0.037	0.031	0.04	0.05	0.0499	0.05	0.05	0.04	0.04	0.03	0.03	0.05	0.05	0.02	0.03
0.02	0.02	0.1	0.04	0.03	0.035	0.03	0.04	0.05	0.0499	0.05	0.05	0.04	0.04	0.03	0.03	0.05	0.05	0.02	0.03
0.02	0.02	0.1	0.04	0.03	0.035	0.03	0.04	0.05	0.0499	0.05	0.05	0.04	0.036	0.03	0.03	0.05	0.05	0.02	0.03
0.02	0.02	0.1	0.04	0.024	0.033	0.03	0.04	0.05	0.0499	0.05	0.05	0.04	0.035	0.03	0.03	0.05	0.05	0.02	0.03
0.02	0.02	0.1	0.04	0.024	0.033	0.03	0.04	0.05	0.0499	0.05	0.05	0.04	0.035	0.03	0.03	0.05	0.05	0.02	0.03
0.02	0.02	0.1	0.04	0.022	0.03	0.03	0.0374	0.05	0.0499	0.05	0.05	0.04	0.034	0.03	0.03	0.05	0.05	0.02	0.03
0.02	0.01	0.1	0.037	0.021	0.03	0.03	0.036	0.05	0.0499	0.05	0.05	0.04	0.033	0.03	0.03	0.05	0.05	0.02	0.03
0.02	0.005	0.1	0.032	0.02	0.03	0.03	0.033	0.05	0.0499	0.05	0.05	0.04	0.03	0.03	0.03	0.05	0.048	0.02	0.03
0.02	0	0.1	0.03	0.02	0.03	0.03	0.0321	0.05	0.0499	0.05	0.05	0.0382	0.03	0.03	0.03	0.05	0.048	0.02	0.03
0.01	0	0.1	0.03	0.02	0.03	0.03	0.03	0.05	0.0499	0.04	0.05	0.036	0.03	0.03	0.03	0.05	0.047	0.02	0.03
0.01	0	0.1	0.03	0.02	0.03	0.03	0.03	0.05	0.0499	0.04	0.05	0.035	0.03	0.03	0.029	0.05	0.0465	0.02	0.03
0.01	0	0.1	0.03	0.02	0.03	0.03	0.03	0.05	0.0499	0.04	0.05	0.03	0.03	0.03	0.028	0.05	0.046	0.02	0.03
0.01	0	0.1	0.03	0.02	0.03	0.03	0.03	0.05	0.0499	0.04	0.05	0.03	0.03	0.028	0.028	0.05	0.045	0.02	0.03
0.002	0	0.1	0.029	0.02	0.03	0.03	0.03	0.05	0.0499	0.04	0.048	0.03	0.03	0.024	0.026	0.05	0.044	0.02	0.03
0		0.1	0.025	0.02	0.03	0.03	0.03	0.047	0.0499	0.04	0.045	0.03	0.03	0.023	0.026	0.05	0.044	0.02	0.03
0		0.1	0.022	0.02	0.03	0.03	0.03	0.0465	0.0499	0.04	0.045	0.03	0.03	0.023	0.026	0.05	0.044	0.02	0.03
0		0.1	0.02	0.02	0.029	0.03	0.03	0.044	0.0499	0.04	0.044	0.03	0.03	0.023	0.025	0.05	0.044	0.02	0.03
0		0.1	0.02	0.02	0.029	0.03	0.03	0.04	0.0499	0.04	0.044	0.03	0.03	0.023	0.025	0.05	0.043	0.02	0.03
0		0.1	0.02	0.02	0.029	0.03	0.03	0.04	0.0499	0.04	0.043	0.03	0.03	0.023	0.025	0.045	0.042	0.02	0.03
0		0.1	0.02	0.02	0.028	0.029	0.03	0.04	0.0499	0.04	0.041	0.03	0.029	0.021	0.025	0.043	0.042	0.02	0.03
0		0.1	0.02	0.02	0.025	0.027	0.029	0.04	0.0499	0.04	0.041	0.03	0.029	0.02	0.025	0.043	0.041	0.02	0.03
		0.1	0.02	0.02	0.025	0.027	0.029	0.04	0.0499	0.04	0.041	0.03	0.028	0.02	0.023	0.042	0.041	0.02	0.03
		0.1	0.02	0.02	0.024	0.026	0.027	0.04	0.0499	0.04	0.04	0.03	0.027	0.02	0.022	0.041	0.04	0.02	0.03
		0.1	0.02	0.02	0.024	0.026	0.026	0.04	0.0499	0.04	0.04	0.029	0.026	0.02	0.022	0.041	0.04	0.02	0.03
		0.094	0.02	0.02	0.024	0.025	0.0257	0.04	0.0499	0.04	0.04	0.026	0.026	0.02	0.022	0.041	0.04	0.02	0.028
		0.094	0.02	0.02	0.023	0.0246	0.025	0.04	0.0499	0.032	0.04	0.026	0.025	0.02	0.0213	0.041	0.04	0.02	0.028
		0.09	0.02	0.02	0.0209	0.024	0.022	0.04	0.049	0.03	0.04	0.025	0.024	0.02	0.021	0.04	0.04	0.02	0.024
		0.09	0.02	0.02	0.02	0.023	0.02	0.04	0.045	0.03	0.04	0.025	0.022	0.02	0.021	0.04	0.04	0.02	0.023
		0.09	0.02	0.02	0.02	0.023	0.02	0.04	0.04	0.03	0.04	0.024	0.022	0.02	0.02	0.04	0.04	0.02	0.02
		0.09	0.02	0.02	0.02	0.022	0.02	0.04	0.04	0.03	0.04	0.022	0.022	0.02	0.02	0.04	0.04	0.02	0.02
		0.09	0.02	0.02	0.02	0.022	0.02	0.04	0.04	0.03	0.04	0.022	0.021	0.02	0.02	0.04	0.04	0.02	0.02
		0.09	0.02	0.02	0.02	0.021	0.02	0.036	0.04	0.03	0.04	0.021	0.021	0.02	0.02	0.04	0.04	0.02	0.02
		0.09	0.02	0.02	0.02	0.02	0.02	0.033	0.04	0.03	0.04	0.021	0.021	0.02	0.02	0.04	0.04	0.02	0.02
		0.09	0.02	0.02	0.02	0.02	0.02	0.03	0.04	0.03	0.04	0.021	0.02	0.02	0.02	0.04	0.04	0.02	0.02
		0.09	0.02	0.02	0.02	0.02	0.02	0.03	0.04	0.03	0.04	0.02	0.02	0.02	0.02	0.04	0.04	0.02	0.02
		0.085	0.02	0.02	0.02	0.02	0.02	0.03	0.04	0.03	0.04	0.02	0.02	0.02	0.02	0.04	0.04	0.02	0.02
		0.085	0.02	0.02	0.02	0.02	0.02	0.03	0.04	0.03	0.04	0.02	0.02	0.02	0.02	0.04	0.04	0.02	0.02
		0.08	0.02	0.02	0.02	0.02	0.02	0.03	0.04	0.03	0.04	0.02	0.02	0.02	0.02	0.04	0.04	0.02	0.02
		0.08	0.02	0.02	0.02	0.02	0.02	0.03	0.04	0.03	0.04	0.02	0.02	0.02	0.02	0.04	0.04	0.02	0.02
		0.08	0.02	0.02	0.02	0.02	0.02	0.03	0.04	0.03	0.04	0.02	0.02	0.02	0.02	0.04	0.04	0.02	0.02
		0.08	0.02	0.02	0.02	0.02	0.02	0.03	0.039	0.03	0.04	0.02	0.02	0.02	0.02	0.04	0.037	0.02	0.02
		0.08	0.02	0.02	0.02	0.02	0.02	0.03	0.039	0.03	0.04	0.02	0.02	0.02	0.02	0.039	0.037	0.02	0.02
		0.08	0.02	0.02	0.02	0.02	0.02	0.03	0.0387	0.0243	0.04	0.02	0.02	0.02	0.02	0.038	0.037	0.02	0.02
		0.08	0.02	0.02	0.02	0.02	0.02	0.03	0.038	0.023	0.04	0.02	0.02	0.02	0.02	0.037	0.036	0.02	0.02
		0.08	0.02	0.02	0.02	0.02	0.02	0.03	0.035	0.0225	0.04	0.02	0.02	0.02	0.02	0.036	0.036	0.02	0.02
		0.07	0.02	0.02	0.02	0.02	0.02	0.03	0.035	0.02	0.04	0.02	0.02	0.02	0.02	0.035	0.035	0.02	0.02
		0.07	0.02	0.02	0.02	0.02	0.02	0.03	0.035	0.02	0.04	0.02	0.02	0.02	0.02	0.035	0.035	0.02	0.02
		0.07	0.02	0.02	0.02	0.02	0.02	0.03	0.034	0.02	0.04	0.02	0.02	0.02	0.02	0.035	0.035	0.02	0.02
		0.07	0.02	0.02	0.02	0.02	0.02	0.03	0.034	0.02	0.04	0.02	0.02	0.02	0.02	0.035	0.034	0.02	0.02
		0.07	0.02	0.02	0.02	0.02	0.02	0.03	0.033	0.02	0.04	0.02	0.02	0.02	0.02	0.035	0.033	0.02	0.02
		0.06	0.02	0.02	0.02	0.02	0.02	0.03	0.033	0.02	0.04	0.02	0.02	0.02	0.02	0.035	0.032	0.02	0.02
			0.02	0.02	0.02	0.02	0.02	0.03	0.031	0.02	0.04	0.02	0.02	0.02	0.02	0.034	0.032	0.02	0.02
			0.02	0.02	0.02	0.02	0.02	0.03	0.031	0.02	0.04	0.02	0.02	0.02	0.02	0.033	0.031	0.02	0.02
			0.02	0.02	0.02	0.02	0.02	0.03	0.03	0.02	0.04	0.02	0.02	0.02	0.02	0.033	0.03	0.02	0.02
			0.02	0.02	0.02	0.02	0.02	0.03	0.03	0.02	0.04	0.02	0.02	0.02	0.02	0.032	0.03	0.02	0.02
			0.02	0.02	0.02	0.02	0.02	0.03	0.03	0.02	0.04	0.02	0.02	0.02	0.02	0.032	0.03	0.02	0.02
			0.02	0.02	0.02	0.02	0.02	0.03	0.03	0.02	0.04	0.02	0.02	0.02	0.02	0.031	0.03	0.02	0.02
			0.02	0.02	0.02	0.02	0.02	0.03	0.03	0.02	0.04	0.02	0.02	0.02	0.02	0.031	0.03	0.02	0.02
			0	0.02	0.02	0.02	0.02	0.03	0.03	0.02	0.04	0.02	0.02	0.02	0.02	0.031	0.03	0.02	0.02
			0	0.01	0.02	0.02	0.02	0.029	0.03	0.02	0.038	0.02	0.02	0.02	0.02	0.03	0.03	0.02	0.02
			0	0.01	0.02	0.02	0.02	0.029	0.03	0.02	0.038	0.02	0.02	0.02	0.02	0.03	0.03	0.02	0.02
			0	0.003	0.02	0.02	0.02	0.028	0.03	0.02	0.038	0.02	0.02	0.02	0.02	0.03	0.03	0.02	0.02
				0	0.02	0.02	0.02	0.028	0.03	0.02	0.037	0.02	0.02	0.02	0.02	0.03	0.03	0.02	0.02
				0	0.02	0.02	0.02	0.027	0.03	0.02	0.037	0.02	0.02	0.02	0.02	0.03	0.03	0.02	0.02
				0	0.02	0.02	0.02	0.027	0.03	0.02	0.037	0.02	0.02	0.02	0.02	0.03	0.03	0.02	0.02
				0	0.02	0.02	0.02	0.026	0.03	0.02	0.037	0.02	0.02	0.02	0.02	0.03	0.03	0.02	0.02
				0	0.02	0.02	0.02	0.0255	0.03	0.02	0.035	0.02	0.02	0.02	0.02	0.03	0.03	0.02	0.02
				0	0.02	0.02	0.02	0.025	0.03	0.02	0.034	0.02	0.02	0.02	0.02	0.03	0.03	0.02	0.02
				0	0.01	0.02	0.02	0.025	0.03	0.02	0.033	0.02	0.02	0.02	0.02	0.03	0.03	0.02	0.02
				0	0.01	0.02	0.02	0.024	0.03	0.02	0.033	0.02	0.02	0.02	0.02	0.03	0.03	0.02	0.02
					0.01	0.02	0.02	0.024	0.03	0.02	0.032	0.02	0.02	0.02	0.02	0.03	0.03	0.02	0.02
					0.01	0.02	0.02	0.024	0.03	0.02	0.032	0.02	0.02	0.02	0.02	0.03	0.03	0.02	0.02
					0	0.02	0.02	0.024	0.03	0.02	0.032	0.02	0.02	0.02	0.02	0.03	0.03	0.02	0.02
					0	0.02	0.02	0.024	0.03	0.02	0.032	0.02	0.02	0.02	0.02	0.03	0.03	0.02	0.02
					0	0.02	0.02	0.023	0.03	0.02	0.031	0.02	0.02	0.02	0.02	0.03	0.029	0.02	0.02
					0	0.02	0.02	0.023	0.029	0.02	0.031	0.02	0.02	0.02	0.02	0.03	0.029	0.02	0.02
					0	0.02	0.02	0.021	0.029	0.02	0.03	0.02	0.02	0.02	0.02	0.03	0.028	0.02	0.02
					0	0.02	0.02	0.0205	0.024	0.02	0.03	0.02	0.02	0.02	0.02	0.03	0.025	0.02	0.02
						0.02	0.02	0.02	0.0218	0.02	0.03	0.02	0.02	0.02	0.02	0.03	0.024	0.02	0.02
						0.02	0.02	0.02	0.0213	0.02	0.03	0.02	0.02	0.02	0.02	0.03	0.02	0.02	0.02
						0.02	0.02	0.02	0.02	0.02	0.03	0.02	0.02	0.02	0.02	0.03	0.02	0.02	0.02
						0.02	0.02	0.02	0.02	0.02	0.03	0.02	0.02	0.02	0.02	0.03	0.02	0.02	0.02
						0.02	0.02	0.02	0.02	0.02	0.03	0.02	0.02	0.02	0.02	0.03	0.02	0.02	0.02
						0.02	0.02	0.02	0.02	0.02	0.03	0.02	0.02	0.02	0.02	0.03	0.02	0.02	0.02
						0.02	0.02	0.02	0.02	0.02	0.03	0.02	0.02	0.02	0.02	0.03	0.02	0.02	0.02
						0.02	0.02	0.02	0.02	0.02	0.03	0.02	0.02	0.02	0.02	0.03	0.02	0.02	0.02
						0.02	0.02	0.02	0.02	0.02	0.03	0.02	0.02	0.02	0.02	0.03	0.02	0.02	0.02
						0.02	0.02	0.02	0.02	0.02	0.03	0.02	0.02	0.02	0.02	0.03	0.02	0.02	0.02
						0.02	0.02	0.02	0.02	0.02	0.03	0.02	0.02	0.02	0.02	0.03	0.02	0.02	0.02
						0.02	0.02	0.02	0.02	0.02	0.03	0.02	0.02	0.02	0.02	0.03	0.02	0.02	0.02
						0.02	0.02	0.02	0.02	0.02	0.03	0.02	0.02	0.02	0.02	0.03	0.02	0.02	0.02
						0.02	0.02	0.02	0.02	0.02	0.03	0.02	0.02	0.02	0.02	0.029	0.02	0.02	0.02
						0.02	0.02	0.02	0.02	0.02	0.03	0.02	0.02	0.02	0.02	0.027	0.02	0.02	0.02
						0.02	0.02	0.02	0.02	0.02	0.03	0.02	0.02	0.02	0.02	0.027	0.02	0.02	0.02
						0.02	0.02	0.02	0.02	0.02	0.03	0.02	0.02	0.02	0.02	0.027	0.02	0.02	0.02
						0.02	0.02	0.02	0.02	0.02	0.03	0.02	0.02	0.02	0.02	0.025	0.02	0.02	0.02
						0.02	0.02	0.02	0.02	0.02	0.03	0.02	0.02	0.01	0.02	0.025	0.02	0.02	0.02
						0.02	0.02	0.02	0.02	0.02	0.0297	0.02	0.02	0.01	0.02	0.025	0.02	0.02	0.02
						0.02	0.02	0.02	0.02	0.02	0.029	0.02	0.02	0.01	0.02	0.024	0.02	0.02	0.02
						0.01	0.02	0.02	0.02	0.02	0.029	0.02	0.02	0.01	0.02	0.024	0.02	0.02	0.02
						0.01	0.02	0.02	0.02	0.02	0.028	0.02	0.02	0.01	0.02	0.023	0.01	0.02	0.02
						0.01	0.02	0.02	0.02	0.02	0.026	0.02	0.02	0.01	0.02	0.023	0.01	0.02	0.02
						0.0056	0.02	0.02	0.02	0.02	0.025	0.02	0.02	0.01	0.02	0.022	0.01	0.02	0.02
						0	0.02	0.02	0.02	0.02	0.025	0.02	0.02	0.01	0.02	0.02	0.01	0.01	0.02
						0	0.02	0.02	0.02	0.02	0.022	0.02	0.01	0.01	0.01	0.02	0.01	0.01	0.02
						0	0.02	0.02	0.02	0.02	0.02	0.02	0.01	0.01	0.01	0.02	0.01	0.01	0.02
						0	0.02	0.02	0.02	0.02	0.02	0.02	0.01	0.01	0.01	0.02	0.01	0.01	0.02
						0	0.02	0.02	0.02	0.02	0.02	0.02	0.01	0.01	0.01	0.02	0.01	0.01	0.016
						0	0.02	0.02	0.02	0.02	0.02	0.02	0.01	0.01	0.01	0.02	0.0039	0.01	0.01
						0	0.02	0.02	0.02	0.02	0.02	0.02	0.01	0.01	0.01	0.02	0	0.01	0.01
						0	0.019	0.02	0.02	0.02	0.02	0.02	0.01	0.01	0.01	0.02	0	0.01	0.01
						0	0.01	0.02	0.02	0.02	0.02	0.02	0.01	0.01	0.01	0.02	0	0	0.01
						0	0.01	0.02	0.02	0.02	0.02	0.02	0.01	0.01	0.01	0.02	0	0	0.01
						0	0.01	0.02	0.02	0.02	0.02	0.02	0.01	0	0	0.02	0	0	0.01
						0	0	0.02	0.02	0.02	0.01	0.02	0.01	0	0	0.02	0	0	0.01
						0	0	0.02	0.02	0.02	0.01	0.015	0.01	0	0	0.02		0	0.01
							0	0.02	0.02	0.02	0.01	0.01	0.01	0	0	0.02		0	0.01
								0.02	0.02	0.02	0.01	0.01	0.01	0	0	0.02		0	0.01
								0.02	0.02	0.02	0.01	0.01	0	0		0.02		0	0.01
								0.02	0.02	0.02	0.01	0.01	0	0		0.02		0	0.01
								0.02	0.02	0.02	0.01	0.01	0	0		0.01			0.01
								0.02	0.02	0.02	0.01	0.01	0			0.01			0
								0.02	0.02	0.02	0	0.01	0			0.01			0
								0.02	0.02	0.02	0	0.01	0			0.01			0
								0.02	0.02	0.02	0	0.01	0			0.01
								0.02	0.02	0.02	0	0	0			0
								0.02	0.02	0.02	0	0				0
								0.02	0.02	0.01	0	0				0
								0.01	0.02	0.01	0	0				0
								0.01	0.02	0.01	0	0				0
								0	0.02	0.01	0	0
								0	0.02	0.01		0
								0	0.02	0.01
								0	0.02	0.01
								0	0.02	0.002
								0	0.01	0
								0	0.01	0
									0.01	0
									0.01	0
									0.01	0
									0	0
									0
									0

## Sheet: PCT_high_r14
PCT-EQA -Manufacturer r014, positive samples
Additional Information
This table contains the raw results of the EQA participants without any correction. Results from obvious swap of samples are highlighted in green. Results that were excluded because they exceede the calibration by > 20% are highlighted in orange
April 2008	November 2008	May 2009	November 2009	April 2010	November 2010	April 2011	November 2011	May 2012	November 2012	May 2013	November 2013	May 2014	November 2014	May 2015	November 2015	May 2016	November 2016	June 2017	November 2017
16.11	0.4	9.78	2.96	4.59	1.62	1.58	22.5	6.61	8.1	17.9	8.97	11.5	16.2	22.07	8.98	8.66	5.55	22.1	8.37
15.59	0.4	9.58	3.08	4.47	1.51	1.6	3	6.74	7.58	16.2	8.9	9.94	14.12	23.71	8.54	9.4	5.5	29	8.3
15	0.3	8.11	3.2	4.5	1.67	1.59	18.8	6.4	6.4	17.3	9.19	11.1	14.1	25.5	8.9	9.1	4.75	31	9.04
12.7	0.26	10.1	3.2	4.2	1.75	1.43	23.1	5.07	0.1	16.2	8.55	10.49	14.8	27.81	9.04	8.56	6.09	25.2	8.98
14.04	0.36	9.53	3.04	3.94	1.76	1.5	3	5.31	7.66	15.9	7.67	11.5	16.94	18.83	8.59	8.47	4.94	17.6	7.97
14.5	0.24	8.77	3.29	4.5	1.5	1.58	22.6	5.4	7.96	14.38	8.37	9.61	14.6	21.6	8.16	9.6	5.78	26.8	7.83
15.32	0.26	8.15	3.25	4.44	1.62	1.24	26.96	6.53	6.4	16.8	7.57	11.36	12.61	27.91	9.15	9.19	5.26	22	7.24
19.3	0.4	9.38	2.9	3.81	1.44	1.51	22.7	6.13	7.37	14.4	8.82	9.16	15.44	23.1	8.54	10.3	5.55	20.8	8.55
12.1	0.43	10.4	2.6	4.07	1.52	1.62	3	6.31	6.57	1.66	8.25	12.2	14.82	26.2	8.94	7.61	3	24.7	8.5
13.9	0.26	10.2	2.98	3.61	1.64	1.6	19	6.61	7.35	16.85	8.5	10.3	14.51	24.09	9.9	9.16	3.7	24.8	8.63
18.6	0.36	10.56	3.23	4.14	1.83	1.86	19.39	7.2	7.74	1.77	8.05	10.4	16.31	26.3	9.01	9.52	5.77	25.2	9.01
10.71	0.25	8.64	3.19	4.48	1.71	1.6	18.29	5.81	0.72	16.3	8.73	10.46	16.3	24.5	8.57	9.5	5.48	25	8.73
15.4	0.3	8.95	2.9	4.56	1.44	1.43	3	6.55	7.1	13.5	8.92	11.97	14.74	22.8	9.63	8	5.89	29.6	9.51
19.35	0.33	9.4	10.8	4.58	1.56	1.75	19.97	6.76	7.62	13.8	9.04	11.7	17.48	21.6	8.61	9.36	6.05	28	8.57
18.91	0.3	9.34	2.82	4.18	1.65	1.72	23.4	6.24	6.31	15.4	9.73	10.9	14.88	11.6	8.58	9.4	2.87	22	7.54
13.1	0.34	9.4	3.28	4.26	1.68	1.57	23.11	3	4.76	17.4	9.72	7.99	14.5	26.5	7.1	6.7	4.7	22.1	7.23
15.5	0.3	9.31	3.07	4.55	1.5	1.48	20.29	6.52	7.52	13.08	7.77	11.88	15.03	25.58	8.85	10.31	4.6	25.8	6.95
13.9	0.4	8.64	2.98	4.64	1.67	1.66	3	5.93	8	14.51	10.09	11.4	14.1	20.9	8.8	9.28	5.07	27.3	7.06
12.53		8.65	2.91	4.31	1.64	1.55	19.8	6.74	7.74	15.45	9.2	0.05	14.37	20.4	8.2	8.93	5.52	25.9	8.59
16.5		7.16	2.71	4.35	1.64	1.9	3	6	7.71	16.18	9.38	8.06	14.3	25.8	9.3	9	6.29	25.9	8.55
14.9		8.63	3.24	4.29	1.63	1.8	21.81	6.26	6.29	15.9	9.28	11.1	12.91	26	8.92	9.1	4.84	23.3	8.22
		9.6	3.2	4.62	1.3	1.55	22.6	6.6	7.99	17.21	8.35	12	15.27	25.5	7.56	8.53	4.14	30.4	8.28
		8.34	2.96	4.16	1.66	1.84	21.5	6.97	8.32	16.9	8.67	9.94	14.53	24	8.31	7.71	1.61	27	7.83
		10	2.9	3.88	1.75	1.85	20.65	6.87	7.97	14.28	8.44	11.28	15	23.6	7.9	10.4	6.04	24	7.55
		9.7	2.85	4.32	1.58	1.6	18	6.21	8.19	15.28	9.03	11.2	14.87	20.1	9.1	9.52	4.85	24.9	8.75
		9.9	2.41	3.95	1.7	1.59	18.4	5.98	8.07	16.6	8.09	9.67	10.3	21.78	8.45	6.72		28	8.79
		8.96		4.22	1.6	1.9	3	5.91	6.28	12.42	8.07	10.6	14.49	20.95	9.29	8.73		24.6
		7.88		3.9	1.62	1.97	20.1	6.57	6.75	16.7	8.24	11.3	15.2	26.1	0.05	8.44
		9.24		4.16	1.67	1.52	20.4	6.97	7.73	14.9	7.64	11.1	13.9	23.85	8.62	6.58
		7.57			1.25	1.64	3	6.58	7.48	15.64	9.24	10.59	15.1	26.01	8.58	9.48
					1.53	1.74	24.3	6.84	7.47	15.8	7.3	11.2	14.1	25.6	8.31	8.8
						1.82	22.4	6.36	5.94	17.16	8.96	10.8	15.41	21.4	9.12
						1.11	20.48	6.34	7.46	15.8	8.13	9.95	13.2	23.4	9.05
						2	20.24	6.4	7.61	15.7	7.4	11.2	15.8	20.1	8.3
						1.83	3	6.28	7.33	16.6	7.43	8.44	14		8.86
						1.6	23	6.43	7.81	14.71	3	11.25	15.5
						1.09	23.09	6.94	7.84	14.14	8.2	11.01	14.19
						1.27	22.93	6.39	8.22	14.4	9.3	12.37	9.52
						1.5	3	6.5	7.08	14.5	8.33	9.94	14.37
							22.42	6.69	7.42	16.8	7.98	9.91	11.9
							4	6.43	7.97	15.8	7.55	12.75	12.68
							22.5	6.15	7.6	15.06	8.1	10.98	12.93
							14.45	6.29	7.91	15.95	7.6		12.75
							22.56	5.84	5.74	15.21	9.18		12.82
							21.1	0.05	7.97	16.5	7.73		15.2
							20.9	6.88	7.6	15.68	8.78
							18.3	6.02	7.62	17.04	8.75
							22.2	6.78
							20.1	7.1
							18.4	5.34
							4
							18.3
							21
							23.2
							17.8
							14.26
							23.18
							3
							21.5
							20.1
							19.97
							21.11

## Sheet: PCT_low_r14
PCT-EQA - Manufacturer r014, negative samples
Additional Information
This table contains the raw results of the EQA participants without any correction. Results from obvious swap of samples are highlighted in green. Results that were excluded because they exceede the calibration by > 20% are highlighted in orange
April 2008	November 2008	May 2009	November 2009	April 2010	November 2010	April 2011	November 2011	May 2012	November 2012	May 2013	November 2013	May 2014	November 2014	May 2015	November 2015	May 2016	November 2016	June 2017	November 2017
0.05	0.05	0.07	0.05	0	0.05	0.05	0.0499	0	0.0499	0.05	0.05	0	0.05	0.05	0.05	0.05	0.05	0.05	0.05
0.05	0.05	0.1	0.05	0.05	0.05	0.05	1	0.05	0.0499	0.05	0.05	0.05	0.05	0.05	0.05	0.05	0.05	0.02	0
0.05	0	0.08	0.1	0.05	0.05	0.05	0.0499	0.05	0.0499	0.05	0.05	0.05	0.05	0.05	0.05	0.05	0.05	0.1	0.1
0.01	0.05	0.1	0.05	0.05	0.05	0.05	0.0499	0.05	7.2	0.05	0.05	0.05	0.05	0.05	0.05	0.05	0.05	0.05	0.05
0.05	0.05	0.18	0.05	0.05	0.05	0.05	1	0.05	0.499	0.05	0.05	0.05	0.05	0.05	0.05	0.05	0.05	0.05	0.05
0.05	0.05	0.07	0.05	0.05	0	0.05	0.0499	0.05	0.0499	0.05	0.05	0.05	0.05	0.05	0.05	0.05	0.05	0.05	0.05
0.05	0.05	0.09	0.05	0.05	0.05	0.05	0.0499	0.05	0.0499	0.05	0.05	0.05	0.05	0.05	0.05	0.05	0.05	0.05	0.05
0.05	0.05	0.08	0.05	0.05	0.05	0.05	0.0499	0.05	0.0499	0.05	0.05	0.05	0.05	0.05	0.05	0.05	0.05	0.05	0.05
0.05	0.05	0.09	0.05	0.05	0.05	0.05	1	0.05	0.0499	0.05	0.05	0.05	0.05	0.05	0.05	0.05	1	0.05	0.05
0.05	0.05	0.1	0.05	0.05	0.05	0.05	0.0499	0.05	0.0499	0.05	0.05	0.05	0.05	0.05	0.05	0.05	0.01	0.05	0.05
0	0.05	0.09	0.05	0.05	0.05	0	0.0499	0.49	0.0499	0.05	0.05	0.05	0.05	0.05	0.05	0.05	0.05	0.05	0.05
0.05	0.05	0.08	0.05	0.05	0.05	0.05	0.0499	0.05	0.0499	0.05	0.05	0.05	0.05	0.05	0.05	0.05	0.05	0.05	0.05
0.05	0.05	0.08	0.05	0.05	0.05	0.05	1	0.05	0.0499	0.05	0.05	0.05	0.05	0.05	0.03	0.05	0.05	0.05	0.05
0.05	0.05	0.085	0.12	0.1	0.05	0.05	0.0499	0.05	0.0499	0.05	0.05	0.05	0.05	0.05	0.05	0.05	0.05	0.05	0.05
0.05	0.05	0.1	0.05	0.1	0.05	0.05	0.0499	0.05	0.0499	0.05	0.05	0.05	0.05	0	0.05	0.05	0.05	0.05	0.05
0.05	0.05	0.08	0	0.05	0.05	0.05	0.0499	1	0.0499	0.04	0.05	0.05	0.05	0.05	0.02	0.05	0.05	0.05	0.05
0.05	0.05	0.1	0.05	0.05	0.05	0.05	0.0499	0.05	0.0499	0.05	0.05	0.05	0.05	0.05	0.05	0.05	0.05	0.05	0.05
0.05	0.05	0.1	0.05	0	0.05	0.05	1	0.05	0.0499	0.05	0.05	0.05	0.05	0.05	0.05	0.05	0.05	0.05	0.05
0.05		0.07	0.2	0.05	0.05	0.05	0.0499	0.05	0.0499	0.06	0.05	10.4	0.05	0.07	0.05	0.05	0.05	0.05	0.05
0.05		0.06	0.05	0.03	0.02	0.05	1	0.05	0.0499	0.05	0.05	0.05	0	0.05	0.05	0.05	0.05	0.05	0.05
0.05		0.1	0.05	0.05	0.05	0.05	0.0499	0.05	0.0499	0.05	0.05	0.05	0.05	0.05	0.05	0.05	0.05	0.05	0.05
		0.12	0.05	0.05	0.05	0.05	0.0499	0.05	0.05	0.05	0.05	0.05	0.05	0.05	0.05	0.05	0.05	0.05	0.05
		0.08	0.05	0.05	0.05	0.05	0.0499	0.05	0.0499	0.03	0.05	0.05	0.05	0.05	0.05	0.05	0.05	0.05	0.05
		0.1	0.05	0.05	0.05	0.5	0.05	0.05	0.0499	0.05	0	0.05	0.05	0.05	0.05	0.05	0.05	0.05	0.05
		0.09	0.05	0.05	0.05	0	0.0499	0.03	0.0499	0.05	0.05	0.05	0.05	0.05	0.05	0.05	0.05	0.05	0.05
		0.1	0.05	0.05	0.05	0.05	0.0499	0.05	0.0499	0.02	0.05	0.05	0	0.05	0.05	0.05		0.05	0.05
		0.11		0.05	0.05	0.05	1	0.05	0.0499	0.05	0.05	0.05	0.05	0.05	0.05	0.05		0.05
		0.09		0.05	0.05	0.05	0.0499	0.05	0.03	0.05	0.05	0	0.05	0.05	7.19	0.05
		0.07		0.05	0.05	0.05	0.0499	0.05	0.0499	0.05	0.05	0.05	0.05	0.05	0.05	0.05
		0.07			0.05	0.05	1	0.05	0.0499	0.05	0.05	0.05	0	0.499	0.05	0.05
					0.05	0.05	0.0499	0.05	0.65	0.05	0.05	0.05	0.05	0.05	0.499	0.499
						0.05	0.0499	0.05	0.0499	0.05	0	0.05	0.05	0.05	0.05
						0.05	0.0499	0.05	0.0499	0.02	0	0.05	0.05	0.05	0.05
						1	0.0499	0.05	0.0499	0.05	0.05	0.05	0.05	0.1	0.1
						0.05	1	0.05	0.0499	0.03	0	0.05	0.05		0.05
						0.05	0.0499	0.05	0.0499	0.05	1	0.05	0.05
						0.05	0.0499	0.05	0.02	0.05		0.05	0.05
						0.05	0.0499	0.05	0.0499	0.05	0.05	0.05	0.05
						0.1	1	0.05	0.0499	0.05	0.05	0.05	0.05
							0.499	0.12	0.0499	0.05	0.01	0.05	0.05
							1	0.05	0.0499	0.05	0.02	0.05	0.05
							0.05	0.05	0.0499	0.05	0.05	0.05	0.05
							0.0499	0.05	0.0499	0.05	0.05		0.05
							0.05	0.05	0.0499	0.05	0.05		0.05
							0.0499	0.05	0.05	0.05	0.05		0.05
							0.0499	0.05	0.0499	0.05	0
							0.05	0.05	0.0499	0.05	0.05
							0.0499	0.05
							0.0499	0.05
							0.0499	0.05
							1
							0.0499
							0.0499
							0.0499
							0.0499
							0.0499
							0.0499
							1
							0.0499
							0.05
							0.0499
							0.0499

## Sheet: PCT_high_r82
PCT-EQA - Manufacturer r082, positive samples
Additional Information
This table contains the raw results of the EQA participants without any correction. Results from obvious swap of samples are highlighted in green. Results that were excluded because they exceede the calibration by > 20% are highlighted in orange
April 2008	November 2008	May 2009	November 2009	April 2010	November 2010	April 2011	November 2011	May 2012	November 2012	May 2013	November 2013	May 2014	November 2014	May 2015	November 2015	May 2016	November 2016	June 2017	November 2017
11.7	0.3	6.41	2.06	2.88	1.38	1.38	16.48	4.57	7.33	12.1	6.86	8.55	7.45	17.82	5.98	5.88	3.71	27.9
13.52	0.36	5.2	2.55	3.03	1.29	1.285	15	3.45	5.42	11.9	8.1	9.1	11.4	23.8	6.8	8.1	4.77	22.4	6.55
12.87	0.4	5.95	2.3	2.89	1.33	0.94	14.8	4.21	5.47	9.32	4.85	8.83	7.7	19.89	5.98	6.77	0.04	16.7	6.28
10.49	0.36	6.5	3.17	3.08	1.5	1.19	15.65	4.025	5	11.88	6.59	8.45	7.75	19.73	5.91	6.89	3.35	18.2	6.4
10.7	0.41	5.57	2	3.03	1.32	1.65	15.4	4.22	4.1	13.4	6.4	7.85	6	0.02	5.5	6.29	4.41	11.6	7.12
10	0.51	6	2.2	2.59	1.49	1.5	12.1	3.39	5.3	11.3	7.04	8.1	8.48	20.1	6.83	6.22	4.27	24	5.8
12.7	0.65	5.65	2.4	2.52	1.34	1.39	11.16	5.5	6.9	11.2	6.34	9.27	9.35	15.4	7.17	7.46	4.36	17.5	7.543
9.15	0.32	6.2	3.08	3.05	1.26	1.7	13.4	4.1	0.04	15.4	7.428	9.2	8.38	15.9	7.75	7.22	0.76	19.6	6.35
10.75	0.44	6.6	2.69	3.07	1.11	1.39	12.1	6.5	3.92	11.01	6.33	12.2	7.35	16.92	6.19	7.2	4.18	17.8	6.07
8.8	0.47	6.68	2.22	3.1	1.25	1.36	10.5	4.3	4.18	12.19	6.25	6.3	6.88	15.6	6.4	6.44	4.4	19.5	6.66
9.26	0.45	7.1	1.93	4.14	1.15	1.63	15	3.93	7.11	11.5	8.61	7.93	7.87	16.3	5.86	8.38	2.4	17.1	6.73
15.1	0.42	5.49	2.27	3.66	1.28	1.55	16.6	5.1	4.24	12.5	6.69	8.24	11.1	18.05	6.02	6.7	3.76	20	7.12
11.57	0.35	6.641	2.4	2.21	1.37	1.06	12.2	4.32	5.911	12.4	5.9	9.274	7.45	21.69	5.78	8.42	4.14	19.1	5.82
11.5	0.41	6.94	3.15	2.34	1.16	1.56	11.47	5.78	6	10.1	7.76	8.255	7.23	17.4	6.09	6.71	3.93	17.4	6.2
7.963	0.4	6.35	2.15	3.2	1.17	1.52	16.16	3.51	5.4	10.8	7.9	8.6	10.8	18.5	6.7	6.06	5.32	18.3	6.97
12.6	0.43	6.4	2.01	2.79	1.4	1.45	10.45	6.3	5.51	10.98	6.23	9.55	8.14	16.8	6.3	8.2	3.68	16.9	6.58
9.78	0.37	6.08	2.21	2.96	1.31	1.28	15.68	3.34	5.29	10.8	8.15	7.98	7.59	14.3	7.42	6.27	3	17.4	5.19
13.4	0.38	5.75	2.17	2.93	0.98	1.55	12.3	3.58	7.7	11.82	8.05	7.95	10.71	18.82	5.35	7.5	4.35	21.3	6.39
9.75	0.42	6.49	2.2	2.71	1.38	1	12.87	6	7.41	11	7.99	11.99	11.03	21.28	5.23	5.04	5.1	17.7	5.94
12.4	0.02	6.36	1.6	2.83	1.38	1.2	13.9	5.8	6.7	11.35	7.37	9.29	7.23	18.5	6.61	8.15	2.91	15.9	6.18
10	0.37	4.23	2.35	2.57	1.35	1.38	15.1	4.7	5.52	10.9	6.93	8.47	10.4	19.32	7.9	6.64	5.21	14.5	4.3
10.3	0.41	5.97	2.23	2.59	1.28	1.28	9.35	4.2	5.67	11.4	7.5	9.07	10	20.4	7.36	7.82	3.4	20	6.6
11.09	0.4	5.8	2.75	2.84	1.39	0.911	14.4	5.67	7.15	11.6	7.659	9.57	6.76	14.4	7.16	7.06	4.94	17	6.04
17	0.42	5.45	2.23	2.93	1.6	1.16	9.78	5.61	5.87	10.7	6.71	11.83	8.8	16.8	5.95	7.2	3.7	21.4	5.9
9.48	0.387	6.86	1.99	2.49	1.36	1.33	11.8	5.81	4.82	9.93	9.2	12.07	7.1	17.95	6.62	9.4	3.67	19.2	5.73
10.78	0.35	6.75	2.15	4.42	1.26	1.11	11.36	4.08	5.45	11.7	7.05	7.56	7.3	17.3	7.2	6.52	4.4	15.6	6.04
10.57	0.41	5.84	2.27	3	1.37	1.23	11.6	4.86	4.39	15.1	8.23	8.48	14.4	16.77	6	4.63	4.37	21.7	6.07
8.2	0.42	6.8	3	2.72	1.18	1.38	16.4	4.67	6.2	11.12	8.81	8.15	7.17	19.44	9.02	7.23	4.14	19.4	5.9
11.27	0.4	6.09	2.01	3.35	1.17	1.22	15.04	2.34	5.91	9.75	7.06	10.88	11.75	21.2	4.86	6.41	3.65	18.9	6.78
11.4	0.47	3.73	2.22	2.29	1.33	1.65	15.6	5.51	6.679	11.7	6	7.28	6.88	13.9	7.02	9.3	0.98	25.9	6.58
4	0.4	10.4	2.24	2.44	1.09	1.59	16.8	4.71	5.64	13.09	6.14	8.06	15.3	13.9	6.32	6.42	3.09	17.2	6.53
11.03	0.18	5.4	2.32	2.87	1.08	1.11	11.18	5.51	5.61	0	5.56	8.02	8.34	16.04	8.86	6.53	3.71	15.7	6.67
14.3	0.44	5.9	3	2.22	1.17	1.35	12.34	4.25	7.55	12.27	7.9	9.25	7.8	22.12	6.35	6.39	4.38	17.3	5.88
10.7	0.37	6.4	2.1	2.55	1.032	1.379	14.2	3.4	6.804	11.75	6.47	7.77	14.03	17.26	7.2	10.9	3.85	19.4	6.69
11.1	0.46	7	2.14	2.74	1.39	1.17	11.54	6.21	4.46	10.29	5.59	8.23	7.78	17.09	6.15	6.1	3.83	20.1	6.73
8.39		5.86	2.29	2.48	1.61	1.35	16.37	5.58	7.2	8.6	6.41	7.92	7.38	22.7	5.4	6.29	5.18	18.5	6.56
7.58		6.5	5.7	2.21	1.19	0.97	13.9	4.29	6.96	15.45	6.09	7.91	7.3	18.4	6.37	7.02	3.44	18.5	6.2
11.1		7.1	2.33	2.64	1.11	1	16.1	5.56	5.87	11.4	6.84	10.5	8.09	17.5	5.96	6.94	5.07	19.7	6.15
8.37		6.47	2.4	2.39	1.1	1.47	14.17	4.16	5.26	11.5	7.03	8.1	6.71	17.22	5.69	5.88	4.38	19.6	7.07
7.7		5.13	2.02	3.11	1.28	0.998	12.2	4.65	5.3	10.9	7.55	9.7	8.31	14.5	6.54	9.22	4.24	18	6.73
16.4		7	2.47	2.994	0.9	1.51	13.5	3.85	7.12	0.02	7.7	8.07	4.7	18.3	6.28	6.3	3.61	24	7.02
10.74		6.71	2.16	2.89	0.9	1.11	7.481	4.34	4.32	11.8	6.8	7	11	18.5	6.38	6.3	4.32	19.8	4.34
8.5		5.79	2.17	2.52	1.36	0.9	15.4	4.22	5.5	11.3	7.09	8.2	14.98	18.5	6.38	6.54	4.34	21.5	6.83
8.6		6	3.03	2.45	1.31	1.281	14	3.58	5.78	10.44	8.19	7.44	6.69	13.1	7.44	6.81	4.06	14.8	6.835
10.4		5.09	2.09	4.42	1.227	1.045	12.41	3.32	4.71	10.6	5.82	8.82	11.8	18.68	6.62	6.1	4.92	18.2	5.14
11		4.84	2.22	2.92	1.3	1.52	14.35	3.4	5.79	12.51	8.99	8.08	8.16	17.8	6.24	6.49	2.89	22.1	6.49
9.29		5.77	1.99	2.58	1.67	1.54	16.2	4.797	4.3	14.4	6.3	9.8	10.45	17.6	6.24	7.35	4.05	17.4	6.09
12.2		5.84	2.5	2.64	1.48	1.58	15.5	4.21	5.25	14.82	6.47	11.61	6.78	17.7	6.41	4.33	4	21.2	6.33
14.9		9.2	2.2	3.04	1.23	1.38	12	3.72	7.2	10.7	7.96	8.97	7.93	11.5	6.14	8.09	4.46	23.4	6.25
9.26		6.4	1.77	2.68	1.25	1.47	12.5	4.17	5.79	7.53	7.01	9.16	9.22	19.29	7.71	7.21	4.28	18.9	5.99
11.7		6.8	2.29	2.7	0.98	1.69	14.5	4.19	3.84	10	6.81	8.34	7.23	18.16	7.79	7.22	3.88	20.6	5.85
10.2		6.87	2.29	2.56	1.36	1.36	14.035	3.55	4.7	11.69	7.75	7.79	11.71	19.1	5.9	6.4	4.45	18.8	6.31
10		6.8	2.03	2.7	1.4	1.3	14.74	5.01	4.32	11.6	6.8	8.23	6.21	13.84	6.57	7.05	2.94	18.8	5.94
8.93		6.01	2.49	2.9	1.17	0.068	14.52	4	5.3	10.29	6.48	8.78	12.5	18.2	7.76	6.25	5.2	21.3	5.68
12.1		6.56	1.8	3	1.35	1.3	11.56	3.69	7.27	8.72	7.96	9.43	10.61	21.6	5.7	5.66	4.36	17	6.6
13.42		4.85	1.87	2.063	1.4	1	16.3	3.41	5.16	12.09	7	7.85	6.13	18.48	7.27	6.07	4.17	19	6.21
8.72		6.16	2.24	2.37	1.52	1.54	14.47	4.21	4.13	10.25	7.29	9.82	7.81	16.34	6.01	6.71	5.18	15.5	6.17
10.79		3.85	2.45	2.79	1.12	1.45	15	3.39	4.23	11.57	7.26	11.04	10.8	14.9	6.22	6.75	4.82	15.4	6.45
10		5.5	2.04	1.87	1.316	1.3	14.9	0.04	3.77	12	7.7	8.09	6.92	16.82	5.81	8.4	4.32	20.9	5.8
12.9		5.26	3.05	3.43	1.31	1.28	13.69	4.3	5.4	15.4	9.2	7.69	7.5	19	5.9	6.91	2.5	17.5	6.31
		6.31	2.2	2.3	1.25	1.35	14	4.1	3.91	11.4	6.14	7.84	9.86	18.6	7.3	7.56	4.26	20.6	6.06
		6.88	2.21	2.94	1.38	1.3	15.3	0.03	5.1	11.4	8.19	9.75	11.4	15.8	5.59	8.053	5.2	18.2	6.73
		6.34	2.89	1.88	1.16	1.35	11.47	3.53	7.16	10.11	7.86	8.25	7.96	19.2	6.39	7.7	3.11	20.4	7.399
		6.14	1.99	2.5	1.245	1.45	12.1	3.41	5.4	11.39	7.07	7.6	8.06	17.1	7.32	6.62	3.33	18.9	6.1
		6.21	2.2	2.86	1.09	1.22	15.52	4.96	4.42	11.3	5.88	9.45	7.14	15.2	7.4	6.84	4.47	20.4	6.5
		7.4	2.2	2.74	1.4	1.15	9.47	4.63	5.37	10.6	6.02	7.72	7.77	19	6.07	6.62	5.27	19.8	5.72
		6.31	2.34	2.9	1.28	1.37	11.93	4.5	5.12	15.46	6.46	9.01	12	18.76	5.79	7.1	4.19	13.8	7
		5.91	3.2	3.09	1.24	1.2	11.74	4.15	4.86	10.63	6.51	8.58	7.89	19.3	6.03	6.5	3.81	20.2	6.815
		6.22	0.024	2.31	1.34	1.35	9.1	4	7.01	11.6	6.67	10	7.08	18.9	6.7	8.84	2.14	21.6
		5.65	2.1	3.05	1.36	1.624	13.4	5.8	6.8	11.9	7.37	8.78	11.7	20.3	5.83	6.68	4.43	19.6
		6.3	2.45	4.29	1.2	1.6	4	4.33	6.6	13.26	7.09	7.1	10.8	17.91	6.71	8.59	1.69
		7.94	2.79	2.82	1.49	1.75	11.9	3.49	5.65	10.8	7.58	9.53	7.19	16.48	6.95	4.92	4.51
		5.3	2.35	3	1.33	1.17	13.11	4.5	7.83	11.5	7.92	10.5	6.74	17.63	5.35	6.61	4.14
		6.4		2.89	1.23	1.279	11.69	4.16	5.37	9.15	7.96	8.4	10.65	19.6	8.27	5.99	2.8395
		5.77		3.07	1.48	1.6	13.08	3.8	7.08	9.98	7.993	7.67	6.9	17.91	7.503	7.834
				2.74	1.29	1.41	11.3	5.67	7.02	10	6.92	8.13	9.75	20	5.63	7.415
				2.72	1.16	1.45	12.5	5.1	4.88	9.03	5.91	6.5	10.9	18.01	5.52	7.98
				2.9	1.25	1.27	15.7	7.09	6.46	3	7.72	8.5	11.8	15	9.03	6.915
				2.75	1.24	1.42	12.14	3.4	8.64	11.5	6.26	6.56	10.83	20.6		9.08
				2.51	1	1.55	10	5.66	8.51	12	6.48	8.14	7.21	0.05		7.3785
				3.12	1.08	0.043	10.7	0.018	5.15	10	5.66	9.09	7.08	18.93
					1.03	1.45	14.2	3.57	5.05	16.68	6.79	8.751	6.6	16.44
						1.11	11.4	5.4	5.2	11.1	6.48	9.34	7.6	18.9
						1.55	12.1	5.4	5.62	10.5	5.99	9.05	7.1	18.53
						1.59	14.5	4.1	4.73	11.02	6.7	8	7.05	21.36
						1.66	15.32	6.68	3	11.05		8.43		19.63
						1.7	12.7	2.59	5.7	11.7		8.52
						0.93	12.68	4.13	4.82	11.9		6.71
						1.18	13.62	4.55	5.27	10.8		7.48
						1.42	17.6	5.55	10	11.58		8.1
						1.49		6	7.7	14.7
						1.51		4.89	6.71
						1.62		3.761	5.08
						1.37		4.57	4.6
						1.44		5.593	5.6
						1.55		6.2	4.67
						1.64		4.02	5.72
						1.26		4.01	3.8
						1.37		4.56	4.54
						1.5		3.46	4.87
						1.25		4.5	5.4
						1.4		4.42	6.97
						1.26			4.25

## Sheet: PCT_low_r82
PCT-EQA - Manufacturer r082, negative samples
Additional Information
This table contains the raw results of the EQA participants without any correction. Results from obvious swap of samples are highlighted in green. Results that were excluded because they exceede the calibration by > 20% are highlighted in orange
April 2008	November 2008	May 2009	November 2009	April 2010	November 2010	April 2011	November 2011	May 2012	November 2012	May 2013	November 2013	May 2014	November 2014	May 2015	November 2015	May 2016	November 2016	June 2017	November 2017
0.3	0.3	0.16	0.02	0.02	0.035	0.02	0.02	0.02	0.03	0.02	0.02	0.02	0.02	0.02	0.03	0.02	0.03	0.05	0.02
0.1	0.1	0.11	0.1	0.02	0.02	0.02	0.02	0.025	0.33	0.023	0.04	0.03	0.02	0.03	0	0	0.044	0.1	0.03
0	0.1	0.15	0.05	0.02	0.02	0.02	0.02	0.03	0.02	0.02	0.056	0.1	0.02	0.02	0.02	0.02	4.25	0.02	0.02
0.02	0.05	0.16	0.05	0.02	0.1	0.025	0.02	0.0205	0.02	0.02	0.04	0.02	0.02	0.02	0.02	0.02	0.02	0.021	0.03
0.09	0.1	0.08	0.03	0.1	0.06	0.02	0.02	0.05	0.06	0.02	0.03	0.02	0.026	16.25	0.026	0.035	0.048	0.02	0.05
0.1	0.3	0.15	0.05	0.02	0.02	0.1	0.1	0.02	0.02	0.02	0.03	0.02	0.02	0.02	0.02	0.02	0.05	0.05	0.02
0.1	0.3	0.17	0.05	0.02	0.02	0.02	0.1	0.1	0.1	0.1	0.04	0.03	0.05	0.05	0.05	0.06	0.05	0.24	0.06
0.02		0.16	0.3	0.04	0.03	0.02	0.02	0.04	5.92	0.05	0.06	0.02	0.02	0.02	0.02	0.03	0.045	0.06	0.02
0.01	0.0251	0.15	0.3	0.04	0.06	0.05	0.04	0.05	0.02	0.04	0.03	0.05	0.03	0.02	0.02	0.03	0.0465	0.02	0.099
0.1	0.5	0.3	0.02	0.06	0.04	0.02	0	0.04	0.02	0.02	0.04	0.02	0.02	0.02	0.02	0.03	0.06	0.085	0.02
0.02	0.01	0.3	0.04	0.05	0.06	0.12	0.02	0.03	0.03	0.06	0.156	0.02	0.02	0.03	0.025	0.06	0.06	0.02	0.02
0.3	0.03	0.1	0.05	0.3	0.01	0.02	0.11	0.02	0.02	0.03	0.03	0.021	0.06	0.02	0.02	0.03	0.07	0.02	0.0311
0.3	0.02	0.164	0.499	0.03	0.03	0.02	0.03	0.04	0.06	0.09	0.04	0.06	0.02	0.06	0.02	0.082	0.03	0.021	0.02
	0.03	0.49	0.05	0	0.02	0.027	0.03	0.06	0.024	0.1	0.03	0.02	0.02	0.01	0.06	0.03	0.03	0.02	0.5
0.0353	0.02	0.22	0.1	0.03	0.1	0.03	0.1	0.024	0.088	0.02	0.1	0.03	0.09	0.02	0.02	0.03	0.042	0.1	0.02
0.025	0.02	0.18	0.05	0.1	0.02	0.1	0.499	0.08	0.02	0.03	0.03	0.117	0.02	0.128	0.02	0.06	0.037	0.1	0.03
0.47	0.03	0.13	0.02	0.06	0.029	0.02	0.02	0.02	0.09	0.5	0.1	0.02	0.02	0.02	0.11	0.035	1	0.02	0.03
0.1	0.02	0.11	0.029	0.02	0.01	0.02	0.03	0.064	0.02	0.02	0.358	0.029	0.03	0.02	0.02	0.1	0.05	0.02	0.02
0.03	0.04	0.1	0.02	0.02	0.033	0.02	0.0374	0.05	0.07	0.1	0.05	0.05	0.02	0.03	0.02	0.02	0.1	0	0.02
0.1	0.44	0.13	0.02	0.02	0.05	0.03	0.022	0.03	0.08	0.0243	0.05	0.03	0.02	0.1	0.03	0.1	0.01	0.02	0.03
0.5	0.02	0.094	0.05	0.02	0	0.022	0.02	0.1	0.04	0.05	0.06	0.02	0.1	0.02	0.1	0.01	0.05	0	0.02
0	0.02	0.15	0.02	0.02	0.05	0.02	0.06	0.02	0.1	0.02	0.22	0.1	0.05	0.1	0.1	0.05	0.36	0.02	0.02
0.01	0	0.094	0.05	0.05	0.02	0.02	0.0499	0.1	0.04	0.06	0.0527	0.05	0.02	0.01	0.02	0.04	0.05	0.04	0.024
0.05	0.02	0.13	0.02	0.1	0.05	0.05	0.03	0.03	0.049	0.04	0.032	0.02	0.02	0.05	0.05	0.43	0	0.02	0.03
0.02	0.1	0.13	0.02	0.02	0.02	0	0.01	0.02	0.0499	0.03	0.05	0.05	0.02	0.02	0.02	0.05	0.04	0.02	0.02
0.05	0.04	0.17	0.022	0.05	0.024	0.05	0.0321	0.021	0.02	0.02	0.04	0.04	0.02	0.02	0	0.043	0.05	0.02	0.05
0.02	0.02	0.111	0.032	0.02	0.22	0.02	0.0499	0.05	0.06	0.05	0.01	0.02	0.05	0.05	0.02	0.04	0.032	0.02	0.02
0.02	0.005	0.2	0.05	0.02	0.02	0.02	0.02	0.03	0.05	0.0225	0.043	0.02	0.02	0.02	0.05	0.035	0.04	0.02	0.02
0.02	0.03	0.16	0.02	0.11	0.025	0.02	0.02	0.06	0.03	0.02	0.029	0.05	0.051	0.05	0.02	0.04	0.02	0.02	0.02
0.02	0	0.085	0.04	0.02	0.05	0.05	0.02	0.03	0.0213	0.02	0.04	0.02	0.03	0.02	0.499	0.05	0.03	0.02	0.02
1	0.04	0.11	0.05	0.04	0.03	0.027	0.02	0	0.1	0.03	0.02	0.02	0.05	0.02	0.02	0.025	0.04	0.02	0.02
0.03	0.1	0.11	0.02	0.02	0.02	0.02	0.02	0.03	0.02	10.9	0.03	0.01	0.02	0.01	0.05	0.06	0.043	0.02	0.02
0.24	0.06	0.13	1	0.02	0.03	0.031	0.02	0.02	0.0499	0.05	0.1	0.05	0.03	0.04	0.02	0.04	0.042	0.02	0.03
0.04	0.18	0.15	0.02	0.29	0.0209	0.032	0.03	0.02	0.0218	0.02	0.05	0.02	0.05	0.02	0.02	0.02	0.033	0.02	0.02
0.1	0.03	0.135	0.03	0.02	0.023	0.02	0.03	0.05	0.035	0.04	0.038	0.02	0.02	0.02	0.02	0.03	0.05	0.02	0.02
0.05		0.1	0.02	0.02	0.05	0.05	0.02	0.02	0.05	0.02	0.04	0.02	0.05	0.05	0.1	0.025	0.04	0.02	0.26
0.04		0.106	0.1	0.02	0.048	0	0.02	0.02	0.0499	0.05	0.044	0.02	0.029	0.02	0.02	0.027	0.02	0.02	0.05
0.1		0.1	0.05	0.02	0.024	0.01	0.02	0.03	0.02	0.02	0.032	0.1	0.04	0.02	0.033	0.03	0.05	0.025	0
0.1		0.17	0.04	0.02	0.02	0.02	0.02	0.04	0.03	0.02	0.04	0.02	0.499	0.02	0.037	0.03	0.037	0.02	0.02
0.002		0.15	1.73	0.1	0.068	0.02	0.026	0.024	0.02	0.05	0.03	0.1	0.021	0.1	0.036	0.05	0.05	0.05	0.02
0.3		0.15	0.02	0.04	0.1	0.02	0	0.03	0.039	12.1	0.05	0.05	0.02	0.05	0.021	0.045	0.01	0.02	0.02
0.03		0.159	0.02	0.03	0.03	0.03	0.0257	0.02	0.029	0	0.05	0.02	0.02	0.02	0.02	0.05	0.05	0.02	0.02
0		0.11	0.02	0.1	0.02	0	0.02	0.02	0	0.02	0.04	0.02	0.05	0.02	0.022	0.035	0.03	0.02	0.01
0		0.1	0.05	0.02	0.04	0.0056	0.02	0.05	0.0387	0.02	0	0.02	0.02	0.02	0.05	0.05	0.07	0.05	0.028
0.5		0.11	0.05	0	0.1	0.02	0.02	0.02	0.031	0.02	0.04	0.036	0.03	0.02	0.04	0.05	0.05	0.02	0.02
0.1		0.09	0.06	0.02	0.037	0.04	0.02	0	0.02	0.054	0.06	0.02	0.02	0.02	0.05	0.03	0.01	0.01	0.03
0		0.11	0.1	0.02	0.05	0.05	0.1	0.0255	0.02	0.04	0.04	0.02	0.01	0.02	0.02	0.1	0.035	0.02	0.02
0.01		0.15	0.1	0.02	0.02	0.05	0.02	0.03	0.034	0.05	0.04	0.05	0.05	0.023	0.01	0.121	0.05	0.05	0.02
0		0.2	0	0.04	0.02	0.02	0.2	0.02	0.03	0.03	0.07	0.04	0.02	0.03	0.02	0.05	0.052	0.02	0.02
0.05		0.15	0.037	0.037	0.03	0.02	0.05	0.02	0.03	0.04	0.038	0.04	0	0.02	0.499	0.03	0.024	0.025	0.031
0.1		0.1	0.047	0.04	0.05	0	0.02	0.02	0.02	0.05	0.04	0.05	0.02	0.05	0.02	0.03	0.035	0.02	0.02
0.03		0.162	0.04	0.02	0.3	0.021	0.027	0.02	0.1	0.04	0.04	0.02	0.035	0.02	0.02	0.05	0.032	0.02	0.02
0.5		0.17	0.06	0.02	0	0.02	0.02	0.02	0.03	0.02	0.05	0	0.02	0	0.02	0.03	0.03	0.02	0.03
0.03		0.129	0.03	0.01	0.02	1.28	0.02	0.02	0.04	0.04	0.01	0.02	0.06	0.02	0.02	0.041	0	0.1	0.02
0.02		0.18	0.02	0	0.05	0.1	0.0499	0.02	0.05	0.02	0.03	0.03	0.01	0.03	0.05	0.032	0.05	0.031	0.02
0.14		0.08	0.02	0.024	0	0.02	0.02	0.024	0.05	0.02	0.04	0.02	0.029	0.02	0.01	0.024	0.02	0.02	0.02
0.1		0.16	0.1	0.032	0.05	0.03	0.02	0.02	0.03	0.02	0.041	0.03	0.03	0.01	0.02	0.034	0.03	0.02	0.02
0.1		0.09	0.02	0.02	0.025	0.03	0.02	0.05	0.01	0.05	0.04	0.01	0.04	0.03	0.03	0.04	0.031	0.02	0.01
0.06		0.11	0.05	0.01	0.028	0.04	0.0499	5.2	0.01	0.02	0.1	0.02	0.02	0.024	0.02	0.05	0.02	0.02	0.02
0.14		0.09	0.05	0.049	0.02	0.023	0.0499	0.04	0.02	0.05	0.05	0.02	0.05	0.02	0.02	0.05	0.05	0.02	0.02
		0.11	0.05	0	0.044	0.02	0.033	0.02	0.02	0.05	0.037	0.02	0.01	0.02	0	0.024	0.03	0.02	0.03
		0.1	0.02	0.032	0.05	0.03	0.02	4.58	0.0499	0.04	0.04	0.03	0.03	0.02	0.025	0.037	0.05	0.02	0.02
		0.16	0.1	0.02	0.02	0.02	0.03	0.05	0.03	0.03	0.07	0.02	0.02	0.05	0.022	0.04	0.03	0.04	0.0325
		0.14	0.02	0.024	0.06	0.02	0.1	0.02	0.03	0.02	0.04	0.05	0.028	0.05	0.01	0.03	0	0	0.02
		0.17	0.02	0.02	0.03	0.02	0.02	0.05	0.0499	0.02	0.04	0.05	0.02	0.01	0.02	0.03	0.04	0.02	0.03
		0.2	0.06	0.02	0.02	0.05	0.06	0.02	0.04	0	0.03	0.02	0.499	0.02	0.03	0.04	0.05	0.02	0.02
		0.15	0.06	0.1	0.02	0.029	0.03	0.04	0.02	0.05	0.03	0.03	0	0.02	0.02	0.03	0.02	0.02	0.5
		0.1	0.1	0.5	0.02	0	0.1	0.024	0.02	0.02	0.04	0.02	0.499	0.02	0.02	0.02	0.02	0.02	0.02
		0.1	1.81	0.02	0.02	0.05	0.019	0.05	0.05	0.03	0.354	0	0.02	0.02	0.499	0.499	0.04	0.02
		0.1	0.02	0.02	0.02	0.0246	0.02	0.04	0.04	0.03	0.05	0.28	0.04	0	0.02	0.05	0.04	0.02
		0.2	0.05	0.05	0.1	0	1	0.036	0.1	0.04	0.06	0.02	0.02	0.05	0.02	0.05	0.05
		0.43	0.05	0.05	0.1	0.05	0.02	0.05	0.05	0.02	0.05	0.04	0.03	0.2	0.02	0.05	0.029
		0.09	0.06	0.06	0.5	0.05	0.036	0.02	0.0499	0.02	0.28	0.0431	0.04	0.01	0.02	0.03	0.05
		0.13		0.02	0.02	0.1	0.02	0.029	0.02	0.04	0.04	0.02	0.01	0.03	0.05	0.03	0.06
		0.16		0	0.02	0.1	0.02	0.03	0.04	0.02	0.026	0.05	0.02	0.02	0.0213	0.023
				0.02	0.06	0.03	0.02	0.02	0.03	0.5	0.029	0.02	0.02	0.02	0.03	0.033
				0.06	0.1	0.04	0.02	0	0.02	0.03	0.04	0.02	0.02	0.02	0.02	0.06
				0.3	0.04	0.02	0.1	0.05	0.06	1	0.04	0.02	0.2	0.06	0.05	0.039
				0.02	0.1	0.03	0.03	0.02	0	0.02	0.02	0.01	0.025	0.05		0.05
				0.02	0.1	0.03	0.499	0.03	0.0499	0.04	0.045	0.058	0.02	24.65		0.06
				0.06	0.05	1.62	0.04	4.887	0.02	0	0.025	0.02	0.02	0.01
					0.05	0.1	0.1	0.03	0.038	0.05	0.034	0.0382	0.02	0.02
						0.02	0.02	0.03	0.03	0.05	0.01	0.03	0.02	0.02
						0.03	0.04	0.03	0.03	0.032	0.038	0.02	0.02	0.05
						0.02	0.06	0.03	0.02	0.02	0.02	0.02	0.02	0.03
						0.03	0.029	0.05	1	0.03		0.02		0.02
						0.02	0.0499	0.02	0.06	0.02		0.025
						0.02	0.029	0.033	0.02	0.04		0.05
						0.04	0.02	0.03	0.05	0.02		0.02
						0.1	0.02	0.02	0.5	0.02		0.02
						0.5		0.05	0.0499	0.05
						0.04		0.03	0.05
						0.024		0.156	0.034
						0		0.02	0.04
						0.02		0.027	0.035
						0.05		0.03	0.03
						0.03		0.03	0.039
						0.02		0.02	0.04
						0.02		0.024	0.01
						0.05		0.02	0.02
						0.03		0.03	0.03
						0.02		0.04	0.0499
						0.02			0.05

## Sheet: PCT_high_r149
PCT-EQA - Manufacturer r149, positive samples
Additional Information
This table contains the raw results of the EQA participants without any correction. Results from obvious swap of samples are highlighted in green. Results that were excluded because they exceede the calibration by > 20% are highlighted in orange
April 2008	November 2008	May 2009	November 2009	April 2010	November 2010	April 2011	November 2011	May 2012	November 2012	May 2013	November 2013	May 2014	November 2014	May 2015	November 2015	May 2016	November 2016	June 2017	November 2017
	0.42	6.58	2.19	2.78	1.25	1.37	15.4	3.87	5.57	10.4	6.37	7.55	8.2	99	5.77	6.95	3.84	23.6	6.3
	0.33	6.24	2.22	2.43	1.39	1.26	15.8	3.59	5.79	11	5.15	7.96	8.5	18.6	5.7	6.6	4.01	19	6.12
	0.42	6.01	1.96	2.37	1.13	0.93	11.15	4.2	4.26	11.12	6.05	9.63	7.06	22.1	6.92	5.57	4.05	17.2	6.88
	0.259	6.33	2.17	2.6	1.34	1.38	13.9	4.87	6.1	10.92	6.9	7.35	6.51	16.1	6.52	6.7	3.825	21.4	6.49
	0.434	6.39	2	2.67	1.33	1.2	11.77	2.79	4.69	12.9	6.82	8.4	7.1	17.3	5.8	5.96	3.2	17.8	6.9
	0.35	6.59	1.8	2.75	1.06	0.02	13.16	3.77	4.32	11.5	6.97	7.62	7.31	16.56	6.62	0.02	3.66	17.9	5.65
	0.367	6.95	2.4	2.83	1.11	1.37	9.96	3.4	5.4	10.99	9.03	7.92	8.2	19.1	6.1	7.31	3.98	22.8	5.72
	0.353	5.3	1.76	2.76	0.91	1.23	12.1	3.92	5.44	11.85	6.71	8.29	8	17.4	6.01	7.02	2.34	18	7
	0.39	6.49	2.32	2.4	1.35	1.29	16.24	4.35	5.73	11.5	6.79	8.08	8.06	0.024	5.85	7	3.72	21.8	6.63
	0.303	5.5	1.85	2.66	1.11	1.13	13.1	3.57	5.53	11.16	6.84	8.82	7.73	18.6	5.04	6.3	3.61	18.8	6.7
	0.42	6.65	2.25	2.5	0.8	1.03	13.05	3.32	5.85	12.9	7.24	9	7.32	17.79	5.42	5.61	3.75	22.6	6.72
	0.484	5.82	2.64	2.51	1.1	1.2	13.93	3.28	5.27	12.14	6.4	7.73	7.53	19.08	6.19	6.55	1.47	15.9	6.01
	0.39	6.75	1.89	2.38	1.17	1.43	15.12	3.4	5.14	0.02	5.46	6.96	5.53	18	6.04	6.78	0.032	16.2	6.82
	0.44		1.96	2.79	1.37	0.99	15.1	4.2	5.73	12.81	7.16	7.39	8.26	19.2	5.92	6	2.2	16.7	5.64
	0.44		2.1	2.66	1.32	1.06	11.64	4.11	5.28	11.4	6.22	7.03	7.78	16.485	5.7	6.46	4.07	12.2	6.02
			2.3	2.75	1.4	1.44	15.85	3.47	5.16	10.86	6.78	6.5	7.8	19.47	4.85	6.13	4.82	20.4	5.6
			2.09	3.06	1.28	1.5	14.1	4.1	5.68	10.05	6.33	7.8	7.5	18.65	6.19	6.69	2.74	16.4	6.4
			2.26	2.3	1.17	1.47	15.1	3.45	5.08	11.82	6.86	7.35	7.89	17.2	6	7.25	3.88	15.4	6.5
			2.13	2.74	1.23	1.41	16	4.45	5.25	11.24	6	7.77	7.16	0	5.7	5.83	4.59	19.9	6.2
			2.33	2.7	1.28	1.19	13.9	4.47	5.32	11.51	6.94	8.47	7.08	19.8	6.07	6.47	2.45	20.7	6.36
			2.13	2.32	1.17	1.33	15.91	3.4	3.07	10.9	6.38	6.91	7.5	17.1	6.5	6.62	3.21	17.5	5.6
				2.68	1.36	1.275	14.49	3.85	4.51	12.05	7.59	9.27	6.95	17.44	6.235	6.58	4.56	21	5.85
				2.79	1.17	1.51	14.75	4.24	5.25	11.3	6.78	7.47	6.85	14.6	6.58	6.31	4.47	20.6	6.89
				2.89	1.24	1.43	16	3.8	5.61	10.17	6.51	8.91	8.19	18.04	5.87	6.29	3.7	16.5	6.03
					1.13	1.41	15.32	3.81	5.84	12.3	6.84	8.28	7.27	19.1	6.47	6.09	3.18	17.3	6.44
						1.3	12.3	4.15	5.53	10.01	6.47	8.9	7.92	18.2	5.87	6.15	2.59	19	6.79
						1.28	14.2	4.24	5.9	10.8	7.21	7.81	7.47	17.55	6.01	4.15	2.68	21.3	6.64
						1.31	13.03	3.93	4.35	11.8	7	7.88	7.38	17.28	6.7	6.57	4.47	16.8	5.88
						1.21	15.74	4.2	5.04	11.84	6.86	8.6	7.9	15.37	5.35	6.82	4.1	17.3	6.08
						1.44	12	3.68	4.78	12.34	6.37	8.68	6.63	18.61	6.18	6.49	3.59	23.5	6.71
						1.28	15.15	3.48	5.09	11.1	5.88	9.1	7.22	18.3	5.48	6.22	4.4	18.4	6.26
						1.22	15.4		4.84	12.2	6.62	7.66	6.65	18.46	6.58	5.92	3.06	16.3	6.25
						1.21	15		4.9	11	0.04	8.4	6.7	18	6.21	6.5	4.37	18.1	6.53
							14.7		4.1	10.94	6.88	7.94	7.89	14.82	5.75	6.16	4.2	16.8	5.93
							16.6		4.67	9.49	6.95	8.41	7.38	13.46	5.97	6	4.36	17.4	6.55
							14.5			9.2	5	7.34	6.14	15.9	5.48	5.78	1.77	19.8	6.45
							16.2			10.76	4.24	7.86	6.95	19.3	5.42	6.65	3.79	12	6.44
							16.11			8.8	5.08	7.48	6.43	16.5	5.79	6.65	4.63	22.6	5.77
							12.9			9.25	6.62	8.02	7.32	19.04	4.4	6.6	1.04	17.1	6.89
							13.76				6.27	8.55	8.8	21.43	6.18	6.8	2.76	22	6.65
							11.96				6.08	6.6	7.98	19.7	5.17	5.81	3.41	19.2	6.3
							15.2				4.83	8.38	8	15.77	5.35	6.77	4.34	18.5	6.02
											7.09	8.12	7.2	17.5	6.05	5.7	4.1	19.5	5.25
												6.93	5.12	18.5	6.69	6.78	4.05	18.5	5.85
												8.7	7.31	18.5	5.97	6.31	4.15	17.4	6.56
												7.56	7.72	18.2	6.29	6.59	2.82	19.2	5.6
												7.17	6.76	19.85	6.4	7.03	2.83	19.3	6.63
														0.02	5.99		1.6	19.8	6.27
														18.3	5.47			16.5	6.1
														18.3				21	6.1
														16.2				19.2	6.18
																		21.5	4.59
																		20.5

## Sheet: PCT_low_r149
PCT-EQA - Manufacturer r149,negative samples
Additional Information
This table contains the raw results of the EQA participants without any correction. Results from obvious swap of samples are highlighted in green. Results that were excluded because they exceede the calibration by > 20% are highlighted in orange
April 2008	November 2008	May 2009	November 2009	April 2010	November 2010	April 2011	November 2011	May 2012	November 2012	May 2013	November 2013	May 2014	November 2014	May 2015	November 2015	May 2016	November 2016	June 2017	November 2017
	0.02	0.13	0.02	0.06	0.039	0.03	0.02	0.027	0.02	0.02	0.04	0.02	0.022	0.02	0.02	0.023	0.0039	0.02	0.03
	0.02	0.14	0.025	0.052	0.02	0.02	0.02	0.025	0.02	0	0.03	0.03	0.04	0.04	0.02	0.03	0.02	0.02	0.02
	0.02	0.14	0.02	0.06	0.02	0.02	0.02	0	0.05	0.02	0.04	0.02	0.02	0.02	0.02	0.035	0.02	0.02	0.02
	0.02	0.115	0.06	0.02	0.03	0.02	0.02	0.02	0.02	0.02	0.1	0.025	0.03	0.02	0.028	0	0.044	0.02	0.02
	0.02	0.129	0.02	0.02	0.029	0.02	0.02	0.02	0.02	0.02	0.1	0.02	0	0.023	0.02	0.029	0.1	0.02	0.02
	0.02	0.13	0.1	0.04	0.04	1.2	0.02	0.028	0.03	0.02	0.041	0.02	0.2	0.1	0.026	7.05	0.036	0.02	0.02
	0.02	0.15	0.02	0.02	0.02	0.023	0.02	0.03	0.02	0.02	0.04	0.022	0.03	0.02	0.1	0.041	0.028	0.02	0.2
	0.02	0.12	0.02	0.021	0.02	0.03	0.7	0.04	0.033	0.02	0.067	0.02	0.02	0.2	0.02	0.03	0.035	0.02	0.02
	0.03	0.16	0.03	0.1	0.024	0.03	0.02	0.04	0.02	0.02	0.044	0.02	0.02	18.4	0.02	0.03	0.034	0.02	0.02
	0.02	0.11	0.02	0.02	0.02	0.02	0.02	0.02	0.045	0.02	0.04	0.041	0.021	0.03	0.03	0.1	0.03	0.02	0.02
	0.03	0.14	0.02	0.02	0.04	0.04	0.2	0.026	0.02	0.02	0.037	0.02	0.022	0.03	0.02	0.04	0.1	0.03	0.02
	0.02	0.13	0.02	0.03	0.03	0.02	0.02	0.02	0.03	0.05	0.045	0.02	0	0.023	0.03	0.03	0.044	0.02	0.1
	0.02	0.147	0.02	0.02	0.04	0.032	0.124	0.06	0.05	10	0.07	0.02	0.042	0.03	0.04	0.031	3.68	0.02	0.02
	0.02		0.02	0.02	0.02	0.02	0.04	0.03	0.05	0.02	0.04	0.02	0.021	0.1	0.02	0.03	0.02	0.02	0.034
	0.02		0.02	0.06	0.035	0.02	0.05	0.02	0.029	0.02	0.033	0.02	0.02	0.03	0.053	0.02	0.04	0.02	0.02
			0.02	0.02	0.048	0.026	0.499	0.04	0.033	0.02	0.05	0.02	0.02	0.028	0.02	0.05	0.05	0.02	0.02
			0.02	0.031	0.02	0.04	0.02	0.02	0.03	0.03	0.033	0	0.02	0.038	0.02	0.499	0.05	0.03	0.03
			0.02	0.02	0.02	0.02	0.02	0.044	0.02	0.02	0.035	0.02	0.02	0.02	0.02	0.04	0.05	0.028	0
			0.02	0.02	0.02	0.02	0.02	0.029	0.04	0.03	0.05	0.02	0.02	0	0	0.043	0.03	0.5	0.03
			0.02	0.046	0.038	0.02	0.02	0.04	0.03	0.02	0.05	0.2	0.02	0.02	0.02	0.025	0.041	0.02	0.05
			0.02	0.04	0.02	0.02	0.02	0.02	0.02	0.02	0.032	0.02	0.2	0.02	0.02	0.02	0.02	0.05	0.03
				0.02	0.02	0.03	0.02	0.02	0.02	0.03	0.037	0.02	0.027	0.023	0.025	0.051	0.04	0.02	0.02
				0.044	0.02	0.02	0.02	0.047	0.06	0.02	0.032	0.021	0.02	0.023	0.023	0.022	0.05	0.02	0.04
				0.022	0.02	0.02	0.02	0.02	0.02	0.02	0.03	0.02	0.02	0.02	0.02	0.02	0.029	0.02	0.02
					0.029	0.02	0.02	0.1	0.26	0.02	0.04	0.02	0.02	0.03	0.02	0.04	0.02	0.02	0.02
						0	0.02	0.04	0.02	0.02	0.05	0.024	0.02	0.02	0.029	0.02	0.03	0.02	0.02
						0	0.02	0.02	0.02	0.06	0.031	0.026	0.024	0.02	0.1	0.06	0.03	0.02	0.02
						0.01	0.02	0.02	0.02	0.03	0.03	0.02	0.026	0.02	0.022	0.031	0.03	0.02	0.03
						0.02	0.02	0.02	0.02	0.02	0.028	0.04	0.03	0.02	0.03	0.03	0.05	0.02	0.02
						0.02	0.02	0.02	0.02	0.02	0.04	0.04	0.05	0.02	0.02	0.33	0.03	0.02	0.03
						0.02	0.02	0.023	0.035	0.02	0.02	0.02	0.02	0.03	0.02	0.027	0.04	0.02	0.12
						0.02	0.02		0.02	0.02	0.02	0.02	0.02	0.07	0.05	0.04	0.03	0.02	0.03
						0.02	0.02		0.02	0.02	0.02	0.04	0.02	0.02	0.026	0.02	0.044	0.02	0.02
							0.04		0.02	0.02	0.03	0.02	0.022	0.02	0.03	0	0.04	0.02	0.02
							0.02		0.02	0.02	0.03	0.02	0.02	0.02	0.028	0.02	0.04	0.02	0.03
							0.02			0.002	0.022	0.02	0.02	0.02	0.02	0.052	0.03	0.02	0.02
							0.02			0.02	0.03	0.02	0.033	0.02	0.02	0.03	0.046	0.02	0.02
							0.02			0.02	0.04	0.01	0.02	0.02	0.02	0.03	0.04	0.02	0.03
							0.02			0.02	0.041	0.022	0.036	0.021	0.025	0.036	0.02	0.02	0.02
							0.02				0.037	0.02	0.02	0.03	0.02	0.041	0.02	0.02	0.22
							0.02				0.04	0.02	0.03	0.02	0.02	0.033	0.03	0.03	0.02
							0.02				0.05	0.021	0.02	0.02	0.02	0.02	0.04	0.02	0.035
											0.065	0.02	0.02	0	0.03	0.03	0	0.02	0.02
												0.02	0.02	0.02	0.021	0.041	0.05	0.02	0.04
												0	0.02	0	0.02	0.02	0.02	0.02	0.03
												0.02	0.02	0.02	0.02	0.04	0.04	0	0.02
												0.053	0.034	0.02	0	0.027	0.05	0.02	0.02
														16.18	0.02		0.037	0.02	0.02
														0	0.02			0.02	0.02
														0.02				0.023	0.03
														0.02				0.02	0.02
																		0.02	0.02
																		0.02

## Sheet: PCT_others_high
PCT-EQA - Other manufacturers, positive samples
Additional Information
This table contains the raw results of the EQA participants without any correction. Results from obvious swap of samples are highlighted in green. Results that were excluded because they exceede the calibration by > 20% are highlighted in orange
April 2008	November 2008	May 2009	November 2009	April 2010	November 2010	April 2011	November 2011	May 2012	November 2012	May 2013	November 2013	May 2014	November 2014	May 2015	November 2015	May 2016	November 2016	June 2017	November 2017
12.7	0.31	6	2.5	2.94	1.16	1.36	15.37	3.5	3.8	9.1	6.8	8.2	16	20.9	8.92	8.45	5.1	21.7	0.05
8.74	1.7	7.18	2.43	3.2	1.11	1.29	14.99	6.98	5.32	12.3	6.65	12.91	15.85	12.77	5.88	6.98	3.3	20.2	5
10	0.33	4.7	2.62	2.9	1.38	1.04	14.91	6.82	7.04	15.6	6.13	9.77	12.72	25.34	5.96	6.49	3.73	21.5	6.6
12.5	0.36	6.797	2.125	2.25	0.81	1.33	11.62	6.65	7.6	11.3	8.45	8.61	7.52	21.7	8.44	6.71	3.98	21	6.907
18	0.48	10.8	2.4	2.67	1.31	1.31	15.4	6.75	3.82	11.6	8.59	9.829	13.3	14.66	7.4	7.9	4.1	26.9	7.27
19.2	0.35	6.4	2.26	4.47	1.38	1.58	15.1	7.02	7.74	11.6	6.28	8.99	9.82	14	7.24	8.45	6.08	19.5	5.83
15.6	0.24	6.9	2	2.44	1.67	1.33	15.71	5.39	7.82	12.11	6.7	9.17	9.7	14.42	6.03	5.08	5	21	6.73
8	0.43	6.85	2.41	3.1	1.23	1.3	11.57	4.24	7.62	15.7	8.5	8.57	10.01	22.6	6.4	6.72	4.52	27.6	3.85
10.76	0.33	5.21	2.26	3.22	1.05	1.08	16.15	4.12	4.83	15.87	7.04	8.93	9.82	16.59	7.45	0.01	2.38	20	6.15
10.3	0.37	6.67	1.92	2.89	1.15	2.01	16.5	3.64	6.35	12.6	7.23	7.56	786	13.4	7.62	7.25	3.7	22	5.1
9.82	0.31	7.9	2.43	2.57	1.396	1.27	15.4	6.3	3.9	10.98	8.4	8.13	9.77	21.1	6.56	7.3	4.66	18.9	5.87
11	0.35	6.85	2.51	3.1	1.29	1.29	13.46	3.35	4.5	16.3	2.93	9.48	9.5	14.4	7.2	7.85	3.38	20.9	5.5
10.73	0.42	6.35	2.9	1.85	1.5	1.594	14.13	3.91	5.81	9.11	7.27	8.3	3.1	19.27	5.15	7.26		22	7.74
10.18	0.41	6.66	2.02	2.295	1.06	1.32	15.59	5.3	6.04	10.35	6.9	3.4	9.29	28.1	9.01	6.2	1.6	19.5	6.56
9.95	0.41		2	3.52	1.315	1.55	14.36	5.31	5.51	14.44	5.82	9.69	13.4	12.2	9.38	7.12	2.95	10	10
10.4	0.5		2.49	3.08	2	1.47	13.51	6.25	5.9	10.8	7.53	10.8	15.31	21.81	8.7	0.02	3.92	19.5	7.84
14	0.43		2.04	1.64	0.03	1.39	11.32	5.33	6.47	11.6	7.79	11.39	14.5	11.68	5.38	5.95	3.22	38.5	7.79
10.93	0.38		2.4		1.68	1.1		3.76	4.07	11.5	7.4	11.46	10.05	11.3	5.23	9.09	5.04	28.1	8.11
16.6	0.44		2.53		1.27	1.38		4.84	5.25	11	4.5	11.02	9.33	15.03	6.19	2	5	26.8	6
8.29	0.31		2.713		1.64	1.79		4.7	3.86	11.8	6.66	9.62	8.99	14.75	6.55	8.65	3.59	25.3	6.16
10.4	0.36		2.96		1.23	1.22		6.69	4.6	9.04	8.94	9.12	11.6	13.7	5.75	6.01	5.1	23	5.58
10.6	0.43		2.87			1.33		4.69	5.3	12.4	8.66	3	11.1	14.9	5.31	7.9	3.14	14.5	6.43
	0.3		2.21					4.28	3.69	12.4	8.15	9.25	9.19	15.4	7.33	5.49	3.65	20.5	7.88
	0.45							3.76	5.49	12	6.7	8.84	9.75	15.8	7.5	5.94	2.92	22	5.83
	0.5							3.5	3.6	3.2	6.77	9.07	10	15.05	6.29	5.57	2.52	25.7	5.52
	0.36							4.97	4.19	15.7	6.65	9.1	11.4	13.8	7.04	6.58	0.43	20.1	5.66
	0.42							1.5	3.5	10.66	0.01	9.4	9.39	21.48	7.5	7.17	2.98	23	5.95
	0.3							3.68	6.53	15.1	7.08	8.93	6.97	18.47	6.64	6.16	3.99	20.8	5.7
								6.79	7.77	17	7.41	9.6	8.08	20.67	7.61	4.3	3.72	18.5	6.61
								6.8	8.52	15.83	7.25	8.3	11.46	16.45	7.34	5.13	3.26	22.5	5.68
								2.68	6.27	9.51	7.65	8.9		17.11	7.03	3.1	3.34	22.5	5.335
								4.16	4.67	11.04	7.86	8.77			6.76	4.24	2.94	20.9	6.57
								4.3	6	11.3	7.04	9.9			4.97	4.59	2.63	18.5	6.89
								4.03	4.04	11	7.974	8.3			6.68	4.33	2.48	9.86	6.81
								4.86	4.07	9.57	6.41				7.32	4.2	2.97	15.4	3.78
									5.6	12.5	7.11				6.03	4.9	3.35	24.8	4.01
									5.6	12.4	7.21				6.12	6.95	4.29	19.4	5.87
									6.85	13.12	7.84					7.79	3.63	18	6.25
									6.74	11.86						6.76	3.43	21.9	6.53
										12.6						7.42	4.3	21.6	6.38
										11.35						7.2	3.28	23.3	6.79
										11.93						7.29	3.38	24.2	6.14
										12.1						7.61	4.89	26.5	6.708
										13.45						7.33	3.81	21.8	6.62
										8.88						7.56	4.01	24.4	5.91
																7.54	4.56	18.2	6.88
																7.77	5.22	18.5	7.32
																6.73	3.77	18.3	5.07
																8.47	3.59	21.7	6.17
																6.52		19.8	6.52
																8.074		16.4	7
																8.32			5.99
																6.18			5.63
																			5.8

## Sheet: PCT_others_low
PCT-EQA - Other manufacturers, positive samples
Additional Information
This table contains the raw results of the EQA participants without any correction. Results from obvious swap of samples are highlighted in green. Results that were excluded because they exceede the calibration by > 20% are highlighted in orange
April 2008	November 2008	May 2009	November 2009	April 2010	November 2010	April 2011	November 2011	May 2012	November 2012	May 2013	November 2013	May 2014	November 2014	May 2015	November 2015	May 2016	November 2016	June 2017	November 2017
0.1	0	0.1	0	0.1	0.02	0.02	0.02	0.1	0.1	0	0.04	0.02	0.01	0.2	0.05	0.05	0.05	0	7.86
0.04	0.7	0.1	0.1	0.1	0	0.01	0.03	0.05	0.07	0.02	0.02	0.05	0.05	0.01	0.02	0.17	0.07	0.02	0.1
0.1	0	0.1	0.05	0.05	0.1	0.02	0.02	0.05	0.0499	0.05	0.03	0.05	0.05	0.05	0.04	0.03	0.03	0.02	0.02
0.1	0.1	0.147	0.043	0.042	0.01	0.1	0.068	0.05	0.0499	0.02	0.05	0.1	0.08	0.05	0.05	0.038	0.04	0.082	0.016
0.05	0.1	0.12	0.04	0.02	0.04	0.02	0.02	0.05	0.02	0.02	0.05	0.026	0.05	0.01	0.05	0.082	0.082	0.02	0.03
0.05	0.1	0.3	0.02	0.05	0.02	0.05	0.03	0.05	0.0499	0.02	0.1	0.05	0.02	0.1	0.01	0.04	0.047	0.03	0.031
0.05	0.1	0.2	0.499	0.3	0.05	0.026	0.02	0.05	0.0499	0.02	0	0	0	0.03	0.1	0.03	0.499	0.02	0.02
0.1	0.1	0.18	0.3	0	0.3	0.02	0.02	0.02	0.0499	0.05	0	0.02	0.01	0.05	0.038	0.042	0.02	0.01	0.2
0.02	0.05	0.1	0.1	0.03	0.01	0.05	0.3	0.02	0.0499	0.05	0.04	0.01	0.1	0.02	0.01	5	0.041	0.02	0.01
0.1	0.1	0.14	0.1	0.003	0	0.05	0	0.0465	0	0.1	0.05	0.1	22	0.01	0.02	1.17	0.01	0.082	0.1
0.02	0.02	0.1	0.1	0.02	0.033	0.3	0.02	0	75	0.02	0.05	0.02	0.01	0.02	0.01	0.2	0.02	1.46	0.21
0.04	0.3	0.1	0	0.05	0.02	0.03	0.1	0.028	0.02	0	0.29	0.01	0.1	0.499	0.499	0.05	0.2	0.22	0.23
0.1	0.2	0.16	0.04	0.3	0.05	0.1	0.0499	0.04	0.02	0.02	0.1	0.1	0.499	0.1	0.17	0.01	0.02	0.02	0.02
0.1	0.1	0.2	0.02	0.1	0.04	0	0.02	0.05	0.0499	0.05	0.06	0.499	0.1	0.01	0.01	0.499	0.499	0.17	0.29
0.1	0.19		0.02	0.1	0.1	0.022	0.01	0.02	0.22	0.05	0.01	0.1	0.01	4.74	0.499	0.031	0.03	0.5	0.5
0.1	0.1		0.1	0.1	1	0.02	0.01	0.05	0.02	0.05	0.04	0.01	0.05	0.05	0.02	7.73	0.02	0.01	0.1
0.1	0.05		0.03	0.02	1.01	0.05	0.025	0.05	0.0499	0.1	0.05	0.05	0.05	0.1	0.1	0.25	0.17	0.1	0.02
0.02	0		0.1		0.05	0.1		0.02	0.0499	0.06	0.1	0.499	0.1	0.15	0.17	0.01	0.01	0.5	0.05
0.1	0.02		0.1		0.03	0.02		0.05	0.031	0.01	0.499	0.05	0.01	0.02	0.14	0.499	0.082	0.02	0.082
0.1	0.04		0.0574		0.05	0.05		0.1	0.2	0.02	0.1	0.015	0.01	0.01	0.16	0.05	0.05	0.05	0.23
0.1	0.02		0.05		0.03	0.05		0.05	0.1	0.01	0.01	0.1	0.035	0.01	0.13	0.1	0.082	0.082	0.17
0.02	0.1		0.1			0		0.1	0.04	0.01	0.05	1	0.01	0.01	0.17	0.082	0.05	402	0.15
	0.1		0.1					0.01	0.01	0.02	0	0.02	0.01	0.01	0.03	0.15	0.15	0.1	0.12
	0.1							0.02	0.03	0.1	0.048	0.05	0.01	0.01	0.01	0.1	0.17	0.15	0.5
	0.1							2	0.5	0.5	0.1	0.03	0.01	0.01	0.01	0.17	0.34	0.17	0.25
	0.02							0.05	0.02	0.04	0.01	0.035	0.04	0	0.02	0.01	0	0.17	0.01
	0.1							0	0.1	0.1	6.56	0.02	0.02	0.04	0.1	0.14	0.2	0.05	0.05
	0.05							0.1	0.1	0.01	0.01	0.04	0.02	0.02	0.04	0.05	0.15	0	0.17
								0.05	0.02	0.05	0.025	0.01	0.02	0.04	0.03	0.02	0.16	0.05	0.15
								0.05	0.02	0.05	0.05	0.01	0.2	0.05	0.08	0.17	0.2	0.15	0.38
								0.03	0.0499	0.02	0.03	0.05		0.02	0.02	0	0.04	0	0.465
								0.01	0.1	0.1	0.04	0.02			0.02	0	0.32	0.17	0.16
								0.1	0.0499	0.02	0.1	0.2			0.02	0.12	0.499	0.1	0.04
								0.03	0.01	0.02	0.0297	0.03			0.02	0.26	0.17	0.17	0.51
								0.023	0.03	0.01	0.03				0.2	0.09	0.37	1.47	0.17
									0.04	0.04	0.05				0.02	0.79	0.07	0.2	0.37
									0.02	0.1	0.031				0.025	0.05	0.02	0.2	0.2
									0.04	0.01	0.03					0.06	0.04	0.21	0.01
									0.02	0.06						0.06	0	0.02	0.01
										0.01						0.05	0.01	0.01	0.01
										0.02						0.09	0.01	0.01	0.01
										0.02						0.02	0.02	0.01	0.01
										0.04						0.05	0.07	0.01	0.01
										0.02						0.06	0.19	0.01	0.01
										0.1						0.01	0.025	0	0.01
																0.04	0.05	0	0.03
																0.15	0.048	0.1	0.1
																0.03	0.03	0.04	0.01
																0.03	0.036	0.5	0.028
																0.03		0.02	0.02
																0.035		0.02	0.023
																0.04			0.02
																0.032			0.2
																			0.02
