# Supplementary material for: Evaluation of INSTAND e.V.’s external quality assessment for C-reactive protein and procalcitonin
Source: PLoS One. 2019 Aug 16;14(8):e0221426. doi: 10.1371/journal.pone.0221426 (PMC6697325; doi:10.1371/journal.pone.0221426)
Supplement: S3 Table — The legend for the different colours are indicated in the corresponding table sheets. (XLSX) [file pone.0221426.s003.xlsx]

## Sheet: single Labs_CRP
Comparison of the value distribution of CRP measurements of single laboratories in comparison to the median result of all participants
EQA	CRP [mg/L] -Median of results of all participants	CRP[mg/l] Laboratory 1	Lab. 1 %-Difference from total median	CRP[mg/l] Laboratory 2	Lab. 2 %-Difference from total median	CRP[mg/l] Laboratory 3	Lab. 3 %-Difference from total median	CRP[mg/l] Laboratory 4	Lab. 4 %-Difference from total median
January 2013	40	46	15	36.9	-7.75	67	67.5	35	-12.5
May 2013	66.75	75	12.3596	68.3	2.3221	110	64.794	58	-13.1086
August 2013	27.5	31	12.7273	27.6	0.363636	27	-1.81818	24	-12.7273
November 2013	15.7	13	-17.1975	15.8	0.636943	24	52.8662	15	-4.4586
January 2014	53	49	-7.54717	53.6	1.13208	62.6	18.1132	55	3.77358
May 2014	94.5	87	-7.93651	103.6	9.62963	100	5.82011	104	10.0529
August 2014	128.5	119	-7.393	95.5	-25.6809	128.6	0.077821	137	6.61479
October 2014	125.3	117	-6.6241	118	-5.82602	137.5	9.73663	146	16.5204
January 2015	23.2	21	-9.48276	23.4	0.862069	48.8	110.345	24	3.44828
April 2015	89.5	83	-7.26257	93.63	4.61453	104	16.2011	93	3.91061
August 2015	133.1	135	1.4275	121	-9.09091	128.8	-3.23065	100	-24.8685
October 2015	109.5	100	-8.6758	114	4.10959	133	21.4612	117	6.84932
January 2016	105.1	97	-7.70695	102.5	-2.47383	140	33.2065	108	2.75928
May 2016	86.3	85	-1.50637	87.4	1.27462	104	20.5098	92	6.60487
September 2016	56	50	-10.7143	56.9	1.60714	66.8	19.2857	62	10.7143
October 2016	19.2	15	-21.875	19.9	3.64583	16.8	-12.5	19	-1.04167
January 2017	85.8	82	-4.4289	85.9	0.11655	97.6	13.7529	88	2.5641
May 2017	67	56	-16.4179	68.6	2.38806	75.8	13.1343	66	-1.49254
September 2017	65	53	-18.4615	63.2	-2.76923	69.7	7.23077	63	-3.07692
November 2017	70.9	58	-18.1946	58.9	-16.9252	84.4	19.0409	65	-8.32158
Legend:
red	immunturbidimetric methods
green	nephelometric methods
blue	immunologic methods
orange	dry-chemistry methods

## Sheet: single Labs_PCT
Comparison of the value distribution of measurements measurements of single laboratories in comparison to the median result of all participants
EQA	PCT [ng/mL] -Median of results of all participants	PCT [ng/mL] Laboratory 5	Lab. 1 %-Difference from total median	PCT [ng/mL] Laboratory 6	Lab. 2 %-Difference from total median	PCT [ng/mL] Laboratory 7	Lab. 3 %-Difference from total median
April 2008	11.03	15	35.9927	16.4	48.6854
November 2008	0.39	0.4	2.5641	0.51	30.7692	0.39	0
May 2009	6.5	8.77	34.9231	4.48	-31.0769	5.9	-9.23077
November 2009	2.3	3.15	36.9565	3.08	33.913	2.01	-12.6087
April 2010	2.89	4.2	45.3287	3.66	26.6436	2.22	-23.1834
November 2010	1.315	1.76	33.8403	1.35	2.6616	1.08	-17.8707
April 2011	1.38	1.62	17.3913	1.63	18.1159	1.11	-19.5652
November 2011	14.995	18.29	21.974	16.6	10.7036	11.64	-22.3741
May 2012	4.57	6.13	34.1357	6.3	37.8556	3.58	-21.663
November 2012	5.675	6.57	15.7709	5.4	-4.84581	5.73	0.969163
May 2013	11.7	16.8	43.5897	12.4	5.98291	10.9	-6.83761
November 2013	7.09	7.57	6.7701	8.61	21.4386	6.47	-8.74471
May 2014	8.751	11.5	31.4136	9.55	9.13039	8.07	-7.78197
November 2014	8.5	15.44	81.6471	10.8	27.0588	7.38	-13.1765
May 2015	18.465			16.8	-9.01706	18.3	-0.893582
November 2015	6.47			7.42	14.6832	5.4	-16.5379
May 2016	6.78	8.56	26.2537	8.42	24.1888	6.1	-10.0295
November 2016	4	4.75	18.75	3.76	-6	3.09	-22.75
June 2017	19.8	25.2	27.2727	19.5	-1.51515	17.2	-13.1313
November 2017	6.45	8.98	39.2248	6.07	-5.89147	5.6	-13.1783
Legend:
red	manufacturer r014
green	manufacturer r082
blue	manufacturer r149
